1 **Title: Mechanism of recurrent outbreak of the scarlet fever**  
2 **epidemics in mainland China**

3 Meirong Sun<sup>1, #</sup>, Meijia Li<sup>2, #</sup>, Naem Haihambo<sup>2, #</sup>, Huiwen Zhang<sup>3</sup>, Zhizhen  
4 Zhang<sup>4</sup>, Xixi Zhao<sup>5, 6</sup>, Bin Wang<sup>5, 6</sup>, Mingrou Guo<sup>7</sup> and Chuanliang Han<sup>8, \*</sup>

5

6 <sup>1</sup>School of Psychology, Beijing Sport University, Beijing, 100084, China

7 <sup>2</sup>Faculty of Psychology and Center for Neuroscience, Vrije Universiteit Brussel,  
8 1050 Brussels, Belgium

9 <sup>3</sup>School of Public Policy, University of Maryland College Park, College Park, MD  
10 20742, USA

11 <sup>4</sup>Department of Mathematics and Statistics, University of Massachusetts at  
12 Amherst, Amherst, USA.

13 <sup>5</sup>The National Clinical Research Center for Mental Disorders & Beijing Key  
14 Laboratory of Mental Disorders, Beijing Anding Hospital, Capital Medical  
15 University, Beijing, 100088, China

16 <sup>6</sup>Advanced Innovation Center for Human Brain Protection, Capital Medical  
17 University, 100191, Beijing, China

18 <sup>7</sup>Department of Psychology, The Chinese University of Hong Kong, Hong Kong,  
19 China

20 <sup>8</sup>School of Biomedical Sciences and Gerald Choa Neuroscience Institute, The  
21 Chinese University of Hong Kong, Hong Kong SAR, China

22 # Equally contributed

23

24 **\*Corresponding author:**

25 Chuanliang Han

26 Email: [hanchuanliang2014@163.com](mailto:hanchuanliang2014@163.com)

27

28 **Keywords:** scarlet fever; periodical characteristics; epidemics; recrudescence;

29 **public health**  
NOTES: This preprint reports new research that has not been certified by peer review and should not be used to guide clinical practice.

30

31 **Acknowledgments:**

32 This work was funded by the Fundamental Research Funds for Central  
33 Universities (2021TD010), Open project of Beijing Key Laboratory of Mental  
34 Disorders (2020JSJB02), the National Natural Science Foundation of China  
35 (82201701), Beijing Municipal Hospital Research and Development Project  
36 (PX2021068), Advanced Innovation Center for Human Brain Protection Project  
37 (3500-12020137)

38

39 **Conflicts of interest statement:**

40 The co-authors declare that the research was conducted in the absence of any  
41 commercial or financial relationships that could be construed as a potential  
42 conflict of interest.

43

44 **Contributors:** CH, ML, XZ conceived and designed the study. CH, ML, NH,  
45 BW, MS contributed to the literature search, CH, ML contributed to data  
46 collection. CH contributed to the data analysis, and the interpretation of results.

47 All authors contributed to writing the paper.

48

49

50

## 51 **Abstract**

52 In mainland China, most infectious diseases occur once a year, except for  
53 scarlet fever, which has been steadily breaking out twice a year in recent years.  
54 Over the years, the recurrence of scarlet fever, a contagious disease  
55 characterized by a distinctive red rash, has been a focus of attention. However,  
56 the oscillatory mechanism of scarlet fever remains unclear. This study aimed to  
57 uncover how meteorological factors contribute to the recrudescence of scarlet  
58 fever in mainland China. The study used a longitudinal public dataset covering  
59 31 provinces in mainland China, containing 14 years of monthly scarlet fever  
60 infections, along with available local meteorological data. Power spectrum  
61 analysis was conducted on time series data, and correlation analyses were  
62 performed to assess the relationship between the oscillatory nature of  
63 epidemics and meteorological factors. We found that the scarlet fever  
64 epidemics generally occur twice a year in various provinces of China, and the  
65 timing of these outbreaks' peaks progressively from southern to northern  
66 regions. Furthermore, we established an atlas that shows the relationship  
67 between scarlet fever oscillation and meteorological factors. Our findings  
68 indicated a significant correlation between the oscillation characteristics of  
69 scarlet fever in 50% of provinces and each natural meteorological factor. Our  
70 study presents a detailed description of the temporal and spatial changes in the  
71 oscillatory characteristics of scarlet fever for the first time and explores the  
72 oscillatory characteristics of natural meteorological conditions and their  
73 correlation with the number of scarlet fever infections. These findings could  
74 serve as a valuable guide for government prevention and control measures for  
75 the scarlet fever epidemic.

76

## 77 Introduction

78 Scarlet fever, also known as scarlatina, is an acute respiratory infectious  
79 disease caused by group A hemolytic streptococcal bacteria [1]. The disease is  
80 spread through direct person-to-person transmission via airborne droplets,  
81 saliva, and wounds. Patients and carriers are the main sources of infection.  
82 Crowded places, such as schools and daycare centers can facilitate  
83 transmission. Scarlet fever can affect individuals of all age groups worldwide,  
84 although it is most prevalent among children aged 5 to 15 years. Children under  
85 the age of 3 are less likely to contract this condition [2–5].

86

87 An important feature of infectious diseases is their recurrent nature [6–8], which  
88 shows significant periodic oscillations over time [9–14]. In mainland China, most  
89 infectious diseases have annual outbreaks, with specific diseases having their  
90 own distinct outbreaks [9,10]. Scarlet fever, in particular, displays distinct  
91 oscillatory or recurring outbreak characteristics. Unlike other infectious  
92 diseases, such as influenza, which typically break out once a year, scarlet fever  
93 breaks out twice a year. The underlying mechanism driving its oscillatory  
94 infection remains unclear. The repeated outbreaks of scarlet fever have  
95 become a public health concern [15]. There have been some preliminary  
96 studies on the temporal dynamics of scarlet fever in various countries and  
97 regions around the world, including the United Kingdom [16–19], the  
98 Netherlands [20], South Korea [21], and Chinese Hong Kong[22–24]. In  
99 mainland China [25,26], previous studies have also delved into more precise  
100 geographical locations at a provincial-level [27–29], or city-level [4,28,30–33].  
101 However, a systematic examination of scarlet fever’s oscillatory characteristics  
102 is still lacking.

103

104 The occurrence of scarlet fever's epidemic form is determined by multiple  
105 factors, including environmental conditions, the nature and prevalence of the

106 microorganism, distribution factors, and host population resistance. Among the  
107 environmental factors, climate and seasons are particularly significant. Notably,  
108 scarlet fever is observed in both tropical and temperate regions, and its  
109 incidence roughly correlates with the geographical location of a given  
110 country[30]. This correlation can be attributed to meteorological factors. Natural  
111 meteorological factors play an important role, affecting the transmission of  
112 infectious diseases[7,34,35]. Specifically, temperature (°C), precipitation (mm),  
113 humidity (%), and sunshine hours (h) are commonly studied meteorological  
114 factors that have been associated with many diseases, such as epidemic  
115 hemorrhagic fever [36–41], malaria [34,42–54], rabies [55], plague [56,57], and  
116 cholera [12,58]. These meteorological factors are frequently available in public  
117 data, allowing for the examination of their relationship with diseases. Some  
118 initial research has investigated the relationship between scarlet fever and  
119 meteorological factors in Chinese Mainland[4,28,59,60], even delving into  
120 possible connections between scarlet fever and pollution[61,62]. For example,  
121 a study focusing on the Beijing region of China revealed that the incidence of  
122 scarlet fever peaks between May and June (spring to early summer),  
123 accompanied by minor surges in incidence from November to early January  
124 (mid-autumn to mid-winter) [63]. Although these previous studies have explored  
125 the relationship between meteorological factors, environmental factors, and  
126 scarlet fever, the contribution of these natural factors to the oscillation of scarlet  
127 fever is currently unclear. China has notably diverse climate conditions, with a  
128 distinctive feature being the stark variation between regions. The northern part  
129 of the country has a “subarctic” climate, characterized by colder temperatures,  
130 while the southern regions are predominantly influenced by tropical weather  
131 patterns. This stark contrast makes China an excellent region for investigating  
132 the impact of meteorological factors on scarlet fever outbreaks.

133

134 If meteorological factors predominantly influence scarlet fever, it is reasonable  
135 to propose a hypothesis: the characteristics of infectious disease oscillations

136 will exhibit significant shifts with changes in regional location. This shift is likely  
137 to be related to latitude or longitude, and the geographical location of a region  
138 on Earth is closely related to its corresponding climatic conditions, thereby  
139 affecting the number of infections of related infectious diseases, such as scarlet  
140 fever.

141

142 Therefore, in this study, we used public data from the China Public Health  
143 Science Data Center on scarlet fever in 31 provinces of China and the  
144 meteorological data of 31 provinces published in the China Statistical Yearbook  
145 spanning over 14 years to provide a detailed account of the temporal and  
146 spatial changes of the periodic characteristics of scarlet fever infections in  
147 mainland China, and to explore the oscillatory characteristics of natural  
148 meteorological conditions and their relationship with the number of people  
149 infected with scarlet fever. A research paradigm for analyzing oscillations will  
150 also be established to explore the relationship between the characteristics of  
151 scarlet fever oscillations and natural meteorological factors.

152

153

## 154 **Methods**

### 155 **Data and Sources**

156 Time series data on all available monthly reported and confirmed cases of  
157 scarlet fever in 31 administrative regions (23 provinces, 5 autonomous regions,  
158 4 municipalities, and 2 special administrative regions, excluding Taiwan, Hong  
159 Kong, and Macau due to unavailable data) of mainland China from 2005 to 2018  
160 were obtained from the Data Center of the China Public Health Science  
161 (Chinese Center for Disease Control and Prevention). We did not include recent  
162 years' data due to the impact of COVID-19 and the resulting lockdowns in China,  
163 which have significantly affected the natural property of the temporal dynamics  
164 of scarlet fever.

165

166 Monthly reported data of meteorological elements, including temperature,  
167 precipitation, humidity and sunshine hours, were obtained for 31 provinces in  
168 mainland China from January 2005 to December 2018 were obtained from the  
169 China Statistical Yearbook 2006–2019. The meteorological data included in this  
170 study are continuous values that vary with time, which directly reflect the actual  
171 natural conditions each month. This dataset is publicly available worldwide and  
172 is reported annually.

173

### 174 **Ethical Considerations**

175 This study used public data from the China Public Health Science Data Center  
176 and the China Statistical Yearbook. Our study did not involve any interventions  
177 with human participants. This study was approved by the Ethics Committee of  
178 Beijing Sport University (2022142H), China.

179

### 180 **Power Spectrum Analysis**

181 Data processing was performed using custom scripts in MATLAB  
182 ([www.mathworks.com](http://www.mathworks.com)). Spectrum analysis was utilized to quantify fluctuations

183 and the recurrence of epidemics for scarlet fever (Fig 1C) and the natural  
184 factors (Fig 2). Similar methods have been applied in various biomedical fields,  
185 such as life sciences [64–66], neuropsychological disorders [67–69], infectious  
186 diseases [11,70–73], etc. The power spectral density (PSD) for each infectious  
187 disease was computed using the multi-taper method with the Chronux  
188 toolbox[74], an open-source, data analysis toolbox (Chronux) available at  
189 <http://chronux.org>.

190

### 191 **Tuning curves**

192 The tuning curve of the monthly infected cases illustrates an essential profile of  
193 the outbreak of scarlet fever in mainland China (Fig 1B), which gives a direct  
194 monthly snapshot of the situation based on historical data. We assumed that all  
195 infectious diseases included in this study follow a similar annual trend each year  
196 considered in this study, as previously researched [9,11]. Thus, we took the  
197 monthly average number of infected cases and computed them into a tuning  
198 curve (Eq 1). Each infectious disease in this study has a tuning curve, revealing  
199 a clear oscillatory pattern within a year. This method is also employed to  
200 measure the tuning curve of meteorological elements (Fig 2).

$$201 \text{ Tuning curve (Month)} = \frac{\text{sum}(\text{infected cases}(\text{Month}))}{N} \quad (1)$$

202 , where N is the number of the year.

203

### 204 **Preferred month and selectivity of the epidemic outbreak**

205 Two disease indices were defined: preferred month and infection selectivity (Fig  
206 1D-G), which are important indicators that show the infectious property of the  
207 epidemics caused by the disease in a year. The preferred month index  
208 represents the month with the highest number of infection cases in a year. The  
209 selectivity index for infection is defined as 1 minus the ratio of the minimum and  
210 the maximum number of infected cases in a year. A higher selectivity index  
211 (closer to 1) indicates that outbreaks are concentrated within specific months,



212 while a lower index (closer to 0) implies a more year-round occurrence.

213

### 214 **Data Filtering**

215 To preserve the most obvious periodic information, the original continuous data  
216 were high-pass filtered 2.5 times per year and low-pass at 1.5 times per year  
217 (Fig 4A). Both the high-pass and low-pass filters were zero-phased FIR filters  
218 (third-order Butterworth filter), which filter the data in both forward and  
219 backward directions to nullify any phase delays introduced by each filter.

220

### 221 **Correlation Analysis**

222 The Pearson correlation was used to measure the relationship between  
223 properties of the tuning curve and the locations of each province (Fig 1H).  
224 Additionally, Pearson correlations were used to evaluate the relationship  
225 between infected cases (Fig 3; also for filtered data in Fig 4) and meteorological  
226 elements, respectively.

227

### 228 **Statistical Methods**

229 Multiple t-tests with Bonferroni correction were used to compare the oscillation  
230 characteristics before and after 2011 (Fig 5).

231

232

## 233 **Results**

### 234 **Spatiotemporal patterns of scarlet fever incidences in mainland China**

235 This study examined monthly data of confirmed cases of scarlet fever in 31  
236 provinces in China spanning from January 2005 to December 2018 (Fig 1).  
237 Figure 1A shows the time series data of scarlet fever in 10 representative  
238 provinces, with the topographic map displayed above. Evidently, each province  
239 displays distinct oscillatory patterns in its scarlet fever outbreaks as depicted by  
240 their tuning curves (Fig 1B) and power spectrum (Fig 1C). These oscillations

241 manifest with different peaks, occurring once, twice, or even three times a year.  
242 Notably, the power spectrum prominently highlights the occurrence of a  
243 biannual peak as the most significant pattern.

244

245 Through an in-depth analysis of oscillation characteristics, we observed a  
246 decreasing trend in the selectivity of scarlet fever from northwest to southeast  
247 (Fig 1D). Scarlet fever has biannual outbreaks, with peaks occurring during both  
248 the warm (April to September) and cold seasons (October to March). Then, the  
249 dominance level was calculated as the ratio of the number of cases in the warm  
250 peak and cold peak. The results indicate that in the southwest region, more  
251 infections occur during the warm season, while in the northeast region, more  
252 infections occur during the cold season (Fig 1E). Further, we compute the  
253 preferred month during both the warm and cold seasons (Fig 1FG). Intriguingly,  
254 our analysis revealed that the timing of scarlet fever's peak in the southeast  
255 consistently precedes that in the northwest region. Furthermore, to verify the  
256 statistical significance of the shift, we conducted Pearson correlations between  
257 the properties (Fig 1D-F) and the provinces' locations (latitudes and longitudes,  
258 Fig 1H). The selectivity is positively correlated with the latitude but not longitude,  
259 while the dominance level does not correlate with the locations. The preferred  
260 month in warm seasons is positively correlated with the latitude but not with the  
261 longitude, but the preferred month in cold seasons is positively correlated with  
262 both latitude and longitude.

263

#### 264 **Periodic phenomena of meteorological elements in 31 provinces in China**

265 Through the display of the oscillation characteristics, especially the temporal  
266 characteristics of scarlet fever, our findings reveal a gradual change from south  
267 to north or vice versa among various provincial capitals in China. This indicates  
268 that natural meteorological factors can potentially influence the incidence of  
269 scarlet fever, due to the substantial climate variations between northern and  
270 southern China. Therefore, we further explored the oscillatory characteristics of

271 various climate factors (Fig 2) and then conducted a power spectrum analysis  
272 of the time series data encompassing temperature, precipitation, humidity, and  
273 sunshine hours across 31 provinces in China (Fig 2A-D). Notably, all four  
274 meteorological elements in most provinces in China exhibit evident oscillatory  
275 patterns over time. Temperature and precipitation follow a yearly cyclical pattern,  
276 while humidity and sunshine hours may exhibit either strong or weak biannual  
277 periodicity. These outcomes suggest a potential correlation between epidemics  
278 in certain provinces and these meteorological elements.

279

### 280 **Relationship between the scarlet fever infection and meteorological** 281 **elements in China**

282 From the observation of the average infected cases of the scarlet fever  
283 epidemic and the average meteorological elements, scarlet fever infections  
284 may be influenced by several natural factors. Therefore, we then investigated  
285 the relationship between the scarlet fever outbreaks and meteorological  
286 elements in each province in China based on correlation analyses.

287

288 Several scatter plots are shown in Figure 3A. For different provinces, we found  
289 that there are different associations between the number of people infected with  
290 scarlet fever and natural factors, indicating that distinct regions may require  
291 tailored strategies to address the same disease. This diversity is further  
292 illustrated in Figure 3B. In China, 27% of provinces exhibit a correlation  
293 between scarlet fever outbreaks and temperature (with 20% positive correlation  
294 and 7% negative correlation), while 23% of provinces exhibit a correlation  
295 between scarlet fever outbreaks and precipitation (with 13% positive correlation  
296 and 10% negative correlation). Furthermore, 45% of provinces show a  
297 correlation between scarlet fever outbreaks and humidity (with 19% positive  
298 correlation and 26% negative correlation), and 42% of provinces display a  
299 correlation between scarlet fever outbreaks and sunshine hours (with 32%  
300 positive correlation and 10% negative correlation).

301

302 Specifically, the topographic map (Fig 3C) highlights the regional distribution.  
303 Notably, provinces with a significant positive correlation between scarlet fever  
304 epidemics and temperature are clustered in the southwest region, while those  
305 with a significant negative correlation with temperature are found in the  
306 southern region. The influence of precipitation appears to be relatively minimal,  
307 showing the least impact, as indicated by the provinces involved. Positive  
308 correlations with precipitation are mainly found in the central and southern  
309 regions, while sporadic provinces with negative correlation in the southern and  
310 northern regions. Provinces that are positively correlated with humidity are  
311 mainly situated in the southern regions, while those that are negatively  
312 correlated with humidity are mainly in north and northeast areas of China.  
313 Furthermore, the provinces displaying a positive correlation with daylight hours  
314 are primarily found in the southwest and north regions, while those with a  
315 negative correlation are mainly found in the northwest and central southern  
316 regions.

317

318 In sum, scarlet fever outbreaks are affected by various meteorological types  
319 across most provinces in China, and this impact cannot be attributed to a single  
320 factor, but rather a combination of factors (Fig 3D). Further analysis revealed  
321 that only 10 provinces were affected by a single meteorological factor, while  
322 more provinces were affected by multiple factors concurrently.

323

### 324 **Relationship between the periodic characteristics of scarlet fever** 325 **infection and meteorological elements in mainland China**

326 In the analysis above, we found that scarlet fever epidemics are closely related  
327 to natural meteorological factors. However, simply analyzing the correlation  
328 between the number of infected cases and meteorological indicators does not  
329 fully explain the role of periodic oscillations in this context. To tackle this problem,  
330 we first filter the original continuous time series data of scarlet fever infections,

331 retaining the data with a biannual frequency. Next, we standardize the filtered  
332 data on a yearly basis by calculating the z-score, considering that the amplitude  
333 of outbreaks varies from year to year. This process ensured comparability even  
334 when dealing with data from different scales. Then trend information was  
335 removed, retaining only the periodic information of the original data retained  
336 (Fig. 4A first two rows). We then analyzed the correlation between the z-score  
337 value and various meteorological indicators. Similarly, the results indicate  
338 diverse correlations between the z-score and meteorological factors across  
339 different provinces (Fig 4B).

340

341 When considering the entire country, more provinces display significant  
342 outcomes, especially the influence of temperature, which is more pronounced  
343 (Fig 4C). Specifically, 42% of provinces exhibit a correlation between scarlet  
344 fever oscillations and temperature (with 23% showing positive correlation and  
345 19% showing negative correlation), while another 42% of provinces are  
346 observed to show a correlation between scarlet fever oscillations and  
347 precipitation (with 13% positive correlation and 29% negative correlation).  
348 Additionally, 48% of provinces reveal a correlation between oscillations and  
349 humidity (with 3% positive correlation and 45% negative correlation), and 52%  
350 of provinces display a correlation between scarlet fever oscillations and  
351 sunshine hours (with 39% positive correlation and 13% negative correlation).

352

353 Specifically, regarding regional distribution (Fig 4D), provinces in the southwest  
354 region show significant positive correlations between scarlet fever oscillations  
355 and temperature, while those in the central and southern regions exhibit  
356 significant negative correlations with temperature. The provinces that are  
357 positively correlated with precipitation are mainly located in the central and  
358 southern regions, while the northern region mainly shows a negative correlation  
359 to the precipitation. Provinces that are positively correlated with humidity are  
360 mainly observed in Qinghai in the western region, while those that are

361 significantly negatively correlated with temperature are concentrated in  
362 northern China. Finally, provinces that are positively correlated with sunshine  
363 hours are mainly located in the central region, while those that are significantly  
364 negatively correlated with temperature are concentrated in the northeastern  
365 and southern regions. In sum, after removing the trend information and  
366 retaining only the periodic information from the original data, some significant  
367 correlations became insignificant while some others became insignificant.  
368 However, this result does not conflict with the results of Figure 3 or flip polarity.

369

### 370 **Periodic characteristics of scarlet fever infection remains consistent** 371 **before and after 2011**

372 In 2011, the incidence of scarlet fever in China experienced a significant  
373 increase, marking a turning point. This phenomenon has been reported in  
374 previous studies and is thought to be related to changes in the natural  
375 characteristics of the virus (ref). Our results also demonstrate obvious  
376 phenomena (Fig 4A, Fig 5A, B), but the changes in oscillation characteristics  
377 have not been studied. Using the normalized method shown in Figure 4A, it is  
378 clear that the oscillatory phenomenon is comparable before and after 2011. This  
379 is also evident in the tuning curves (Fig 5C). The two peaking months of  
380 epidemic in warm and cold seasons respectively also did not show a significant  
381 difference (Fig 5D). This indicates that although the number of people infected  
382 with scarlet fever increased in 2011, its natural oscillation characteristics  
383 remained unchanged.

384

385

## 386 **Discussion**

### 387 **Principal Findings**

388 This study presents the first endeavor to meticulously examine the temporal  
389 and spatial changes in the oscillation of scarlet fever outbreaks. We explored

390 the oscillatory characteristics of natural meteorological conditions and their  
391 correlation with scarlet fever infections. Additionally, we established a research  
392 framework for analyzing oscillations to explore the relationship between the  
393 oscillatory characteristics of scarlet fever and natural meteorological factors.  
394 Our study not only advances our understanding of these oscillatory patterns but  
395 also holds practical implications for effective public health management and  
396 prevention measures, providing a valuable resource for local authorities.

397

398 First and foremost, the temporal patterns observed present a compelling spatial  
399 progression of scarlet fever incidences. Specifically, varied time lags are  
400 observed across different provinces, with the peak of scarlet fever starting from  
401 the south and then spreading northward (Fig 1). This phenomenon has the  
402 potential to serve as a predictive indicator, assisting northern provinces in  
403 preemptively addressing and managing the emerging epidemic. We found a  
404 significant shift in the oscillation characteristics of scarlet fever from north to  
405 south in China (Fig 1H), which validates the hypothesis we proposed in the  
406 introduction. This also confirms that meteorological factors have a tremendous  
407 impact on the epidemic of scarlet fever in China. This research sample can be  
408 expanded to other countries worldwide.

409

410 Moreover, our study shows a correlation between local scarlet fever oscillation  
411 characteristics and meteorological factors in different provinces of China (Fig 3  
412 & 4). Notably, factors such as humidity (45%) and sunshine hours (42%) have  
413 a higher chance of correlation with scarlet fever outbreaks, which that aligns  
414 with previous research. After removing the trend information and retaining only  
415 the periodic information from the original data, more provinces display  
416 significant outcomes for all four factors, especially the influence of temperature,  
417 which is more salient (27% to 42%).

418

419 Above all, our research reveals the heterogeneous nature of the relationship

420 between different provinces and meteorological influences. This revelation  
421 highlights the imperative for a nuanced and individualized approach to epidemic  
422 prevention. Instead of adopting a uniform strategy across all regions, our study  
423 emphasizes the critical importance of discerning and accounting for the unique  
424 factors that characterize each region. By doing so, authorities can ensure that  
425 their preventive measures are not only effective but also tailored to the specific  
426 exigencies of the region in question. In sum, our study extends on current  
427 knowledge regarding scarlet fever dynamics by unraveling the intricate  
428 relationship between temporal and spatial factors and meteorological  
429 conditions. By aligning public health measures with specific meteorological  
430 conditions, local governments can more effectively customize their  
431 interventions to each unique context, or during the colder months when schools  
432 resume.

433

#### 434 **Comparison With Prior Work**

435 To our knowledge, our study is the first to illustrate the spatiotemporal dynamics  
436 of scarlet fever from an oscillatory view. Previous studies have provided  
437 valuable insights into the characteristics and spatiotemporal distribution of  
438 scarlet fever and have even included meteorological variables [75]. These  
439 studies have, however, primarily focused on fundamental descriptive analysis  
440 [25] rather than providing a detailed characterization and explanation of periodic  
441 features. Some earlier studies attempted to directly characterize the oscillation  
442 of scarlet fever [9,11], but these often utilized national-level data, lacking the  
443 granularity of provincial refinement. For example, Mahara et al., (2016), found  
444 significant correlations between temperature and relative humidity in Beijing  
445 [30].

446

447 Furthermore, it is worth noting that the precision of the data employed primarily  
448 encompasses annual occurrences[61], largely overlooking the potential  
449 influence stemming from meteorological factors that can vary significantly



450 within a single year. Thus, there was little discussion regarding the contribution  
451 of natural meteorological factors on the oscillation characteristics of scarlet  
452 fever over multiple geographical areas. Previous research has generally  
453 focused on infectious diseases in a vaguer and less targeted way in terms of  
454 geography and not on oscillations. Our findings underscore the importance of  
455 considering meteorological factors in the context of disease oscillations,  
456 shedding light on potential links between climate variables and scarlet fever  
457 dynamics. The study presents a data analysis paradigm for studying the  
458 oscillation of infectious diseases (Fig 4). This can be used by future researchers  
459 to further explore various in-depth mechanisms of infectious disease  
460 oscillations.

461

## 462 **Limitations**

463 Our study has some limitations that should be addressed in future research.  
464 Firstly, the availability of more detailed spatial-scale data is currently a  
465 challenge. While our analysis covered all 31 provinces in China, the lack of  
466 finer-scale data prevents us from conducting a more in-depth investigation of  
467 scarlet fever outbreaks within individual cities. This limitation underscores the  
468 need for improved data collection and sharing mechanisms. Additionally, the  
469 absence of consideration for population migration between provinces within  
470 China is another limitation. Despite the scarlet fever population is mainly in  
471 children, we assume that their migration is much weaker than that of adults.  
472 However, future research should still take this factor into account.

473

## 474 **Conclusion**

475 In conclusion, our study represents a significant advancement in the  
476 understanding of scarlet fever dynamics, particularly in terms of its  
477 spatiotemporal oscillations. We have highlighted the importance of considering  
478 meteorological factors in disease oscillation studies and introduced a  
479 comprehensive data analysis paradigm that can be applied to investigate

480 similar phenomena in other infectious diseases. This work provides a  
481 foundation for future investigations to delve deeper into the intricate  
482 mechanisms steering disease oscillations. It can ultimately contribute to more  
483 effective public health interventions.

484

485

486

487

## 488 Reference

- 489 1. Walker MJ, Brouwer S. Scarlet fever makes a comeback. *Lancet Infect Dis* *Lancet*  
490 *Infect Dis*; 2018 Feb 1;18(2):128–129. PMID:29191627
- 491 2. Lee H. Outbreak investigation of scarlet fever in a kindergarten. *Infect Chemother.*  
492 *Korean Society of Infectious Diseases, Korean Society for Chemotherapy*; 2018. p.  
493 65–66. doi: 10.3947/ic.2018.50.1.65
- 494 3. Ryu S, Chun BC. Investigation of scarlet fever outbreak in a kindergarten. *Infect*  
495 *Chemother Korean Society of Infectious Diseases, Korean Society for*  
496 *Chemotherapy*; 2018 Mar 1;50(1):38–42. doi: 10.3947/ic.2018.50.1.38
- 497 4. Cheng W, Li H, Zhang X, Sun W, Chong KC, Lau SYF, Yu Z, Liu S, Ling F, Pan J,  
498 Chen E. The association between ambient particulate matters, nitrogen dioxide, and  
499 childhood scarlet fever in Hangzhou, Eastern China, 2014–2018. *Chemosphere*  
500 *Chemosphere*; 2020 May 1;246. PMID:31918112
- 501 5. Lamden KH. An outbreak of scarlet fever in a primary school. *Arch Dis Child Arch*  
502 *Dis Child*; 2011 Apr;96(4):394–397. PMID:21068078
- 503 6. Morens DM, Folkers GK, Fauci AS. The challenge of emerging and re-emerging  
504 infectious diseases. *Nature* 2004 430:6996 *Nature Publishing Group*; 2004 Jul  
505 8;430(6996):242–249. PMID:15241422
- 506 7. Dietz K. *The Incidence of Infectious Diseases under the Influence of Seasonal*  
507 *Fluctuations*. Springer, Berlin, Heidelberg; 1976;1–15. doi: 10.1007/978-3-642-  
508 93048-5\_1
- 509 8. Altizer S, Dobson A, Hosseini P, Hudson P, Pascual M, Rohani P. Seasonality and  
510 the dynamics of infectious diseases. *Ecol Lett Ecol Lett*; 2006 Apr;9(4):467–484.  
511 PMID:16623732
- 512 9. Han C, Li M, Haihambo N, Cao Y, Zhao X. Enlightenment on oscillatory properties  
513 of 23 class B notifiable infectious diseases in the mainland of China from 2004 to  
514 2020. *PLoS One Public Library of Science*; 2021 Jun 9;16(6):e0252803. Available  
515 from: <https://doi.org/10.1371/journal.pone.0252803>
- 516 10. Cao Y, Li M, Haihambo N, Zhu Y, Zeng Y, Jin J, Qiu J, Li Z, Liu J, Teng J, Li S, Zhao  
517 Y, Zhao X, Wang X, Li Y, Feng X, Han C. Oscillatory properties of class C notifiable  
518 infectious diseases in China from 2009 to 2021. *Front Public Health* 2022;10. doi:  
519 10.3389/fpubh.2022.903025

- 520 11. Zhao X, Li M, Haihambo N, Jin J, Zeng Y, Qiu J, Guo M, Zhu Y, Li Z, Liu J, Teng J,  
521 Li S, Zhao Y, Cao Y, Wang X, Li Y, Gao M, Feng X, Han C. Changes in temporal  
522 properties for epidemics of notifiable infectious diseases in China during the COVID-  
523 19 epidemic: population-based surveillance study. *JMIR Public Health Surveill*  
524 2022;8:1–12. doi: 10.2196/35343
- 525 12. Koelle K, Rodó X, Pascual M, Yunus M, Mostafa G. Refractory periods and climate  
526 forcing in cholera dynamics. *Nature* Nature; 2005 Aug 4;436(7051):696–700.  
527 PMID:16079845
- 528 13. Mills JN, Gage KL, Khan AS. Potential influence of climate change on vector-borne  
529 and zoonotic diseases: a review and proposed research plan. *Environ Health*  
530 *Perspect Environ Health Perspect*; 2010 Nov;118(11):1507–1514. PMID:20576580
- 531 14. Luis AD, Douglass RJ, Mills JN, Bjørnstad ON. The effect of seasonality, density  
532 and climate on the population dynamics of Montana deer mice, important reservoir  
533 hosts for Sin Nombre hantavirus. *J Anim Ecol* *J Anim Ecol*; 2010 Mar;79(2):462–  
534 470. PMID:20015212
- 535 15. Wong SSY, Yuen KY. *Streptococcus pyogenes* and re-emergence of scarlet fever  
536 as a public health problem. *Emerg Microbes Infect.* 2012. PMID:26038416
- 537 16. Guy R, Williams C, Irvine N, Reynolds A, Coelho J, Saliba V, Thomas D, Doherty L,  
538 Chalker V, von Wissmann B, Chand M, Efstratiou A, Ramsay M, Lamagni  
539 TheresaLamagni T, Wissmann von B. 1 Increase in scarlet fever notifications in the  
540 United Kingdom. *Euro Surveill.* 2013. Available from:  
541 [www.eurosurveillance.org:pii=20749](http://www.eurosurveillance.org:pii=20749). Available online: <http://www.eurosurveillance.org/ViewArticle.aspx?ArticleId=20749>
- 542
- 543 17. Chalker V, Jironkin A, Coelho J, Al-Shahib A, Platt S, Kapatai G, Daniel R, Dhami  
544 C, Laranjeira M, Chambers T, Guy R, Lamagni T, Harrison T, Chand M, Johnson AP,  
545 Underwood A, Ramsay M, Fry N, Purohit A, Brown R. Genome analysis following a  
546 national increase in Scarlet Fever in England 2014. *BMC Genomics* *BioMed Central*  
547 Ltd.; 2017 Mar 10;18(1). PMID:28283023
- 548 18. Lamagni T, Guy R, Chand M, Henderson KL, Chalker V, Lewis J, Saliba V, Elliot AJ,  
549 Smith GE, Rushton S, Sheridan EA, Ramsay M, Johnson AP. Resurgence of scarlet  
550 fever in England, 2014–16: a population-based surveillance study. *Lancet Infect Dis*  
551 *Lancet Publishing Group*; 2018 Feb 1;18(2):180–187. PMID:29191628
- 552 19. Duncan1 CJ, Duncan2 SR, Scott1 S. The dynamics of scarlet fever epidemics in  
553 England and Wales in the 19th century. *Epidemiol Infect.* 1996.
- 554 20. McDonald SA, Van Wijhe M, De Gier B, Korthals Altes H, Vlamincx BJM, Hahné S,  
555 Wallinga J. The dynamics of scarlet fever in the Netherlands, 1906–1920: A historical  
556 analysis. *R Soc Open Sci* *Royal Society Publishing*; 2022 Nov 2;9(11). doi:  
557 10.1098/rsos.220030
- 558 21. Park DW, Kim SH, Park JW, Kim MJ, Cho SJ, Park HJ, Jung SH, Seo MH, Lee YS,  
559 Kim BH, Min H, Lee SY, Ha DR, Kim ES, Hong Y, Chung JK. Incidence and  
560 characteristics of scarlet fever, South Korea, 2008–2015. *Emerg Infect Dis* *Centers*  
561 *for Disease Control and Prevention (CDC)*; 2017 Apr 1;23(4):658–661.  
562 PMID:28322696
- 563 22. Lee CF, Cowling BJ, Lau EHY. Epidemiology of reemerging scarlet fever, Hong

- 564 Kong, 2005–2015. Emerg Infect Dis Centers for Disease Control and Prevention  
565 (CDC); 2017 Oct 1;23(10):1707–1710. PMID:28930009
- 566 23. Luk EYY, Lo JYC, Li AZL, Lau MCK, Cheung TKM, Wong AYM, Wong MMH, Wong  
567 CW, Chuang S kwan, Tsang T. Scarlet fever epidemic, Hong Kong, 2011. Emerg  
568 Infect Dis 2012 Oct;18(10):1658–1661. PMID:23018120
- 569 24. Hsieh YC, Huang YC. Scarlet fever outbreak in Hong Kong, 2011. Journal of  
570 Microbiology, Immunology and Infection 2011 Dec;44(6):409–411. PMID:21873124
- 571 25. Liu Y, Chan TC, Yap LW, Luo Y, Xu W, Qin S, Zhao N, Yu Z, Geng X, Liu SL.  
572 Resurgence of scarlet fever in China: a 13-year population-based surveillance study.  
573 Lancet Infect Dis Lancet Publishing Group; 2018 Aug 1;18(8):903–912.  
574 PMID:29858148
- 575 26. Li WT, Feng RH, Li T, Du YB, Zhou N, Hong XQ, Yi SH, Zha WT, Lv Y. Spatial-  
576 temporal china from 2004 analysisto 2017 and visualization of scarlet fever in  
577 mainland China from 2004 to 2017. Geospat Health Page Press Publications;  
578 2020;15(1). PMID:32241094
- 579 27. Zhang Q, Liu W, Ma W, Shi Y, Wu Y, Li Y, Liang S, Zhu Y, Zhou M. Spatiotemporal  
580 epidemiology of scarlet fever in Jiangsu Province, China, 2005-2015. BMC Infect  
581 Dis BioMed Central Ltd.; 2017 Aug 30;17(1). PMID:28854889
- 582 28. Lu J yun, Chen Z qiu, Liu Y hui, Liu W hui, Ma Y, Li T gang, Zhang Z bin, Yang Z  
583 cong. Effect of meteorological factors on scarlet fever incidence in Guangzhou City,  
584 Southern China, 2006–2017. Science of The Total Environment Elsevier; 2019 May  
585 1;663:227–235. PMID:30711589
- 586 29. Tang JH, Tseng TJ, Chan TC. Detecting spatio-temporal hotspots of scarlet fever in  
587 Taiwan with spatio-temporal Gi statistic. PLoS One Public Library of Science; 2019  
588 Apr 1;14(4). PMID:30990838
- 589 30. Mahara G, Wang C, Huo D, Xu Q, Huang F, Tao L, Guo J, Cao K, Long L, Chhetri  
590 JK, Gao Q, Wang W, Wang Q, Guo X. Spatiotemporal pattern analysis of scarlet  
591 fever incidence in Beijing, China, 2005–2014. Int J Environ Res Public Health MDPI;  
592 2016 Jan 15;13(1). PMID:26784213
- 593 31. Chen H, Chen Y, Sun B, Wen L, An X. Epidemiological study of scarlet fever in  
594 Shenyang, China. BMC Infect Dis BioMed Central Ltd.; 2019 Dec 21;19(1).  
595 PMID:31864293
- 596 32. Yang P, Peng X, Zhang D, Wu S, Liu Y, Cui S, Lu G, Duan W, Shi W, Liu S, Li J,  
597 Wang Q. Group a Streptococcus strains circulating during scarlet fever epidemic,  
598 Beijing, China, 2011. Emerg Infect Dis 2013 Jun;19(6):909–915. PMID:23735582
- 599 33. Wu WW, Li Q, Tian DC, Zhao H, Xia Y, Xiong Y, Su K, Tang WG, Chen X, Wang J,  
600 Qi L. Forecasting the monthly incidence of scarlet fever in Chongqing, China using  
601 the SARIMA model. Epidemiol Infect Cambridge University Press; 2022 Apr 21;150.  
602 PMID:35543101
- 603 34. Paaijmans KP, Read AF, Thomas MB. Understanding the link between malaria risk  
604 and climate. Proc Natl Acad Sci U S A Proc Natl Acad Sci U S A; 2009 Aug  
605 18;106(33):13844–13849. PMID:19666598
- 606 35. Brownlee J. The Relationship between Rainfall and Scarlet Fever. Royal Society of  
607 Medicine 1923;

- 608 36. Zhang WY, Gu WD, Fang LQ, Li CP, Bi P, Glass GE, Jiang JF, Sun SH, Qian Q, Liu  
609 W, Yan L, Yang H, Tong SL, Cao WC. Climate variability and hemorrhagic fever with  
610 renal syndrome transmission in Northeastern China. *Environ Health Perspect*  
611 *Environ Health Perspect*; 2010;118(7):915–920. PMID:20142167
- 612 37. Liu X, Jiang B, Gu W, Liu Q. Temporal trend and climate factors of hemorrhagic  
613 fever with renal syndrome epidemic in Shenyang City, China. *BMC Infect Dis BMC*  
614 *Infect Dis*; 2011 Dec 2;11. PMID:22133347
- 615 38. Fang LQ, Wang XJ, Liang S, Li YL, Song SX, Zhang WY, Qian Q, Li YP, Wei L,  
616 Wang ZQ, Yang H, Cao WC. Spatiotemporal trends and climatic factors of  
617 hemorrhagic fever with renal syndrome epidemic in Shandong Province, China.  
618 *PLoS Negl Trop Dis PLoS Negl Trop Dis*; 2010 Aug;4(8). PMID:20706629
- 619 39. Liu X, Qiu S, Liu Z, Chen D, Liu H, Ding G. Effects of floods on the incidence of  
620 acute hemorrhagic conjunctivitis in Mengshan, China, from 2005 to 2012. *American*  
621 *Journal of Tropical Medicine and Hygiene* 2020;102(6):1263–1268.  
622 PMID:32228794
- 623 40. Xiao H, Huang R, Gao LD, Huang CR, Lin XL, Li N, Liu HN, Tong SL, Tian HY.  
624 Effects of Humidity Variation on the Hantavirus Infection and Hemorrhagic Fever  
625 with Renal Syndrome Occurrence in Subtropical China. *Am J Trop Med Hyg Am J*  
626 *Trop Med Hyg*; 2016 Feb 1;94(2):420–427. PMID:26711521
- 627 41. Bi P, Wu X, Zhang F, Parton KA, Long S. Seasonal rainfall variability, the incidence  
628 of hemorrhagic fever with renal syndrome, and prediction of the disease in low-lying  
629 areas of China. *Am J Epidemiol Am J Epidemiol*; 1998 Aug 1;148(3):276–281.  
630 PMID:9690365
- 631 42. Patz JA, Hulmet M, Rosenzweig C, Mitchell TD, Goldberg RA, Githeko AK, Lele S,  
632 McMichael AJ, Le Sueur D. Climate change: Regional warming and malaria  
633 resurgence. *Nature Nature*; 2002 Dec 12;420(6916):627–628. PMID:12478282
- 634 43. Gething PW, Smith DL, Patil AP, Tatem AJ, Snow RW, Hay SI. Climate change and  
635 the global malaria recession. *Nature Nature*; 2010 May 20;465(7296):342–345.  
636 PMID:20485434
- 637 44. Paaijmans KP, Read AF, Thomas MB. Understanding the link between malaria risk  
638 and climate. *Proc Natl Acad Sci U S A Proc Natl Acad Sci U S A*; 2009 Aug  
639 18;106(33):13844–13849. PMID:19666598
- 640 45. Pascual M, Ahumada JA, Chaves LF, Rodó X, Bouma M. Malaria resurgence in the  
641 East African highlands: temperature trends revisited. *Proc Natl Acad Sci U S A Proc*  
642 *Natl Acad Sci U S A*; 2006 Apr 11;103(15):5829–5834. PMID:16571662
- 643 46. Parham PE, Michael E. Modeling the effects of weather and climate change on  
644 malaria transmission. *Environ Health Perspect Environ Health Perspect*; 2010  
645 May;118(5):620–626. PMID:20435552
- 646 47. Paaijmans KP, Blanford S, Bell AS, Blanford JI, Read AF, Thomas MB. Influence of  
647 climate on malaria transmission depends on daily temperature variation. *Proc Natl*  
648 *Acad Sci U S A Proc Natl Acad Sci U S A*; 2010 Aug 24;107(34):15135–15139.  
649 PMID:20696913
- 650 48. Parham PE, Michael E. Modeling the effects of weather and climate change on  
651 malaria transmission. *Environ Health Perspect Environ Health Perspect*; 2010

- 652 May;118(5):620–626. PMID:20435552
- 653 49. Hay SI, Cox J, Rogers DJ, Randolph SE, Stern DI, Shanks GD, Myers MF, Snow  
654 RW. Climate change and the resurgence of malaria in the East African highlands.  
655 Nature Nature; 2002;415(6874):905–909. PMID:11859368
- 656 50. Hay SI, Cox J, Rogers DJ, Randolph SE, Stern DI, Shanks GD, Myers MF, Snow  
657 RW. Climate change and the resurgence of malaria in the East African highlands.  
658 Nature Nature; 2002;415(6874):905–909. PMID:11859368
- 659 51. Mordecai EA, Ryan SJ, Caldwell JM, Shah MM, LaBeaud AD. Climate change could  
660 shift disease burden from malaria to arboviruses in Africa. Lancet Planet Health  
661 Lancet Planet Health; 2020 Sep 1;4(9):e416–e423. PMID:32918887
- 662 52. Baeza A, Santos-Vega M, Dobson AP, Pascual M. The rise and fall of malaria under  
663 land-use change in frontier regions. Nat Ecol Evol Nat Ecol Evol; 2017 Mar 20;1(5).  
664 PMID:28812707
- 665 53. Patz JA, Olson SH. Malaria risk and temperature: influences from global climate  
666 change and local land use practices. Proc Natl Acad Sci U S A Proc Natl Acad Sci  
667 U S A; 2006 Apr 11;103(15):5635–5636. PMID:16595623
- 668 54. Wang Z, Liu Y, Li Y, Wang G, Lourenço J, Kraemer M, He Q, Cazelles B, Li Y, Wang  
669 R. The relationship between rising temperatures and malaria incidence in Hainan ,  
670 China , from 1984 to 2010 : a longitudinal cohort study. Lancet Planet Health 2022;  
671 doi: 10.1016/S2542-5196(22)00039-0
- 672 55. Raghavan RK, Hanlon CA, Goodin DG, Davis R, Moore M, Moore S, Anderson GA.  
673 Bayesian Spatiotemporal Pattern and Eco-climatological Drivers of Striped Skunk  
674 Rabies in the North Central Plains. PLoS Negl Trop Dis PLoS Negl Trop Dis; 2016  
675 Apr 29;10(4). PMID:27127994
- 676 56. Samia NI, Kausrud KL, Heesterbeek H, Ageyev V, Begon M, Chan KS, Stenseth  
677 NC. Dynamics of the plague-wildlife-human system in Central Asia are controlled  
678 by two epidemiological thresholds. Proc Natl Acad Sci U S A Proc Natl Acad Sci U  
679 S A; 2011 Aug 30;108(35):14527–14532. PMID:21856946
- 680 57. Stenseth NC, Samia NI, Viljugrein H, Kausrud KL, Begon M, Davis S, Leirs H,  
681 Dubyanskiy VM, Esper J, Ageyev VS, Klassovskiy NL, Pole SB, Chan KS. Plague  
682 dynamics are driven by climate variation. Proc Natl Acad Sci U S A Proc Natl Acad  
683 Sci U S A; 2006 Aug 29;103(35):13110–13115. PMID:16924109
- 684 58. Colwell RR. Global climate and infectious disease: The cholera paradigm. Science  
685 (1979) 1996;274(5295):2025–2031. PMID:8953025
- 686 59. Rao H xiang, Li DM, Zhao X yin, Yu J. Spatiotemporal clustering and meteorological  
687 factors affected scarlet fever incidence in mainland China from 2004 to 2017.  
688 Science of the Total Environment Elsevier B.V.; 2021 Jul 10;777. PMID:33684741
- 689 60. Duan Y, Yang L juan, Zhang Y jie, Huang X lei, Pan G xia, Wang J. Effects of  
690 meteorological factors on incidence of scarlet fever during different periods in  
691 different districts of China. Sci Total Environ Sci Total Environ; 2017 Mar 1;581–  
692 582:19–24. PMID:28073056
- 693 61. Liu Y, Ding H, Chang S ting, Lu R, Zhong H, Zhao N, Lin TH, Bao Y, Yap L, Xu W,  
694 Wang M, Li Y, Qin S, Zhao Y, Geng X, Wang S, Chen E, Yu Z, Chan TC, Liu S.  
695 Exposure to air pollution and scarlet fever resurgence in China: a six-year

- 696 surveillance study. *Nat Commun Nature Research*; 2020 Dec 1;11(1).  
697 PMID:32843631
- 698 62. Zhang R, Zhang Y. Modeling the effects of air pollutants and meteorological factors  
699 on scarlet fever in five provinces, Northwest China, 2013–2018. *J Theor Biol*  
700 *Academic Press*; 2022 Jul 7;544. PMID:35469892
- 701 63. Mahara G, Chhetri JK, Guo X. Increasing prevalence of scarlet fever in China. *BMJ*  
702 *BMJ*; 2016 May 17;353. PMID:27188472
- 703 64. Han C, Wang T, Yang Y, Wu Y, Li Y, Dai W, Zhang Y, Wang B, Yang G, Cao Z, Kang  
704 J, Wang G, Li L, Yu H, Yeh CI, Xing D. Multiple gamma rhythms carry distinct spatial  
705 frequency information in primary visual cortex. *PLoS Biol PLoS Biol*; 2021 Dec  
706 1;19(12). PMID:34932558
- 707 65. Wang J, Zhao X, Bi Y, Jiang S, Sun Y, Lang J, Han C. Executive function elevated  
708 by long term high-intensity physical activity and the regulation role of beta-band  
709 activity in human frontal region. *Cogn Neurodyn Springer Science and Business*  
710 *Media B.V.*; 2022 Nov 7;1–10. doi: 10.1007/S11571-022-09905-Z/FIGURES/6
- 711 66. Han C, Zhao X, Li M, Haihambo N, Teng J, Li S, Qiu J, Feng X, Gao M.  
712 Enhancement of the neural response during 40 Hz auditory entrainment in closed-  
713 eye state in human prefrontal region. *Cogn Neurodyn Springer Netherlands*; 2022;  
714 doi: 10.1007/s11571-022-09834-x
- 715 67. Cao Y, Han C, Peng X, Su Z, Liu G, Xie Y. Correlation Between Resting Theta Power  
716 and Cognitive Performance in Patients With Schizophrenia. *Front Hum Neurosci*  
717 2022;16(April). doi: 10.3389/fnhum.2022.853994
- 718 68. Han C, Guo M, Ke X, Zeng L, Li M, Haihambo N, Lu J, Wang L. Oscillatory  
719 biomarkers of autism : evidence from the innate visual fear evoking paradigm. *Cogn*  
720 *Neurodyn Springer Netherlands*; 2022;6. doi: 10.1007/s11571-022-09839-6
- 721 69. Han C, Wang T, Wu Y, Li H, Wang E, Zhao X, Cao Q, Qian Q, Wang Y, Dou F, Liu  
722 JK, Sun L, Xing D. Compensatory mechanism of attention-deficit / hyperactivity  
723 disorder recovery in resting state alpha rhythms. *Front Comput Neurosci*  
724 2022;(September):1–10. doi: 10.3389/fncom.2022.883065
- 725 70. Zhao X, Li M, Haihambo N, Wang X, Wang B, Sun M, Guo M, Han C. Periodic  
726 Characteristics of Hepatitis Virus Infections From 2013 to 2020 and Their  
727 Association With Meteorological Factors in Guangdong, China: Surveillance Study.  
728 *JMIR Public Health Surveill JMIR Public Health Surveill*; 2023 Jun 15;9:e45199.  
729 PMID:37318858
- 730 71. Anderson RM, Grenfell BT, May RM. Oscillatory fluctuations in the incidence of  
731 infectious disease and the impact of vaccination: time series analysis. *J Hyg (Lond)*  
732 *J Hyg (Lond)*; 1984;93(3):587–608. PMID:6512259
- 733 72. Cazelles B, Chavez M, De Magny GC, Guégan JF, Hales S. Time-dependent  
734 spectral analysis of epidemiological time-series with wavelets. *J R Soc Interface J*  
735 *R Soc Interface*; 2007 Aug 22;4(15):625–636. PMID:17301013
- 736 73. Oshinubi K, Amakor A, Peter OJ, Rachdi M, Demongeot J, Oshinubi K, Amakor A,  
737 Peter OJ, Rachdi M, Demongeot J. Approach to COVID-19 time series data using  
738 deep learning and spectral analysis methods. *AIMS Bioengineering* 2022 1:1  
739 American Institute of Mathematical Sciences (AIMS); 2021;9(1):1–21. doi:

740 10.3934/BIOENG.2022001

741 74. Bokil H, Andrews P, Kulkarni JE, Mehta S, Mitra PP. Chronux: A platform for  
742 analyzing neural signals. J Neurosci Methods 2010; PMID:20637804

743 75. Yu W, Guo L, Shen X, Wang Z, Cai J, Liu H, Mao L, Yao W, Sun Y. Epidemiological  
744 characteristics and spatiotemporal clustering of scarlet fever in Liaoning Province,  
745 China, 2010-2019. Acta Trop Acta Trop; 2023 Sep;245:106968. PMID:37307889

746

747



748 **Figures and the legends**

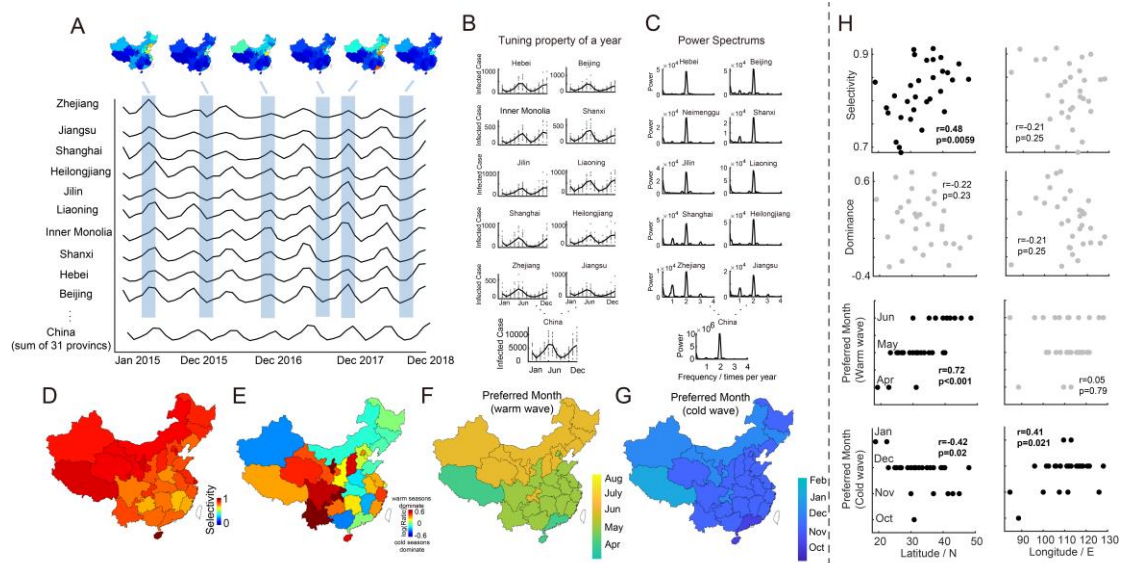

749

750 **Figure 1 Periodic phenomena of scarlet fever epidemics with tuning curve,**  
 751 **power spectrum and topographic map of several indices**

752 A. Monthly incidence of scarlet fever infections in 10 representative provinces,  
 753 accompanied with topographic maps depicting infected case distribution at  
 754 specific intervals.

755 B. Tuning curves of scarlet fever epidemics in example provinces.

756 C. Spectrogram of scarlet fever epidemics from January 2005 to December  
 757 2018 in the aforementioned example provinces.

758 D. Geospatial distribution of the selectivity of scarlet fever epidemics across  
 759 provinces.

760 E. Geospatial distribution of the dominance level of scarlet fever epidemics for  
 761 each province.

762 F. Geospatial distribution of the peaking month of scarlet fever epidemics in  
 763 warm seasons for each province.

764 G. Geospatial distribution of the peaking month of scarlet fever epidemics in  
 765 cold seasons for each province.

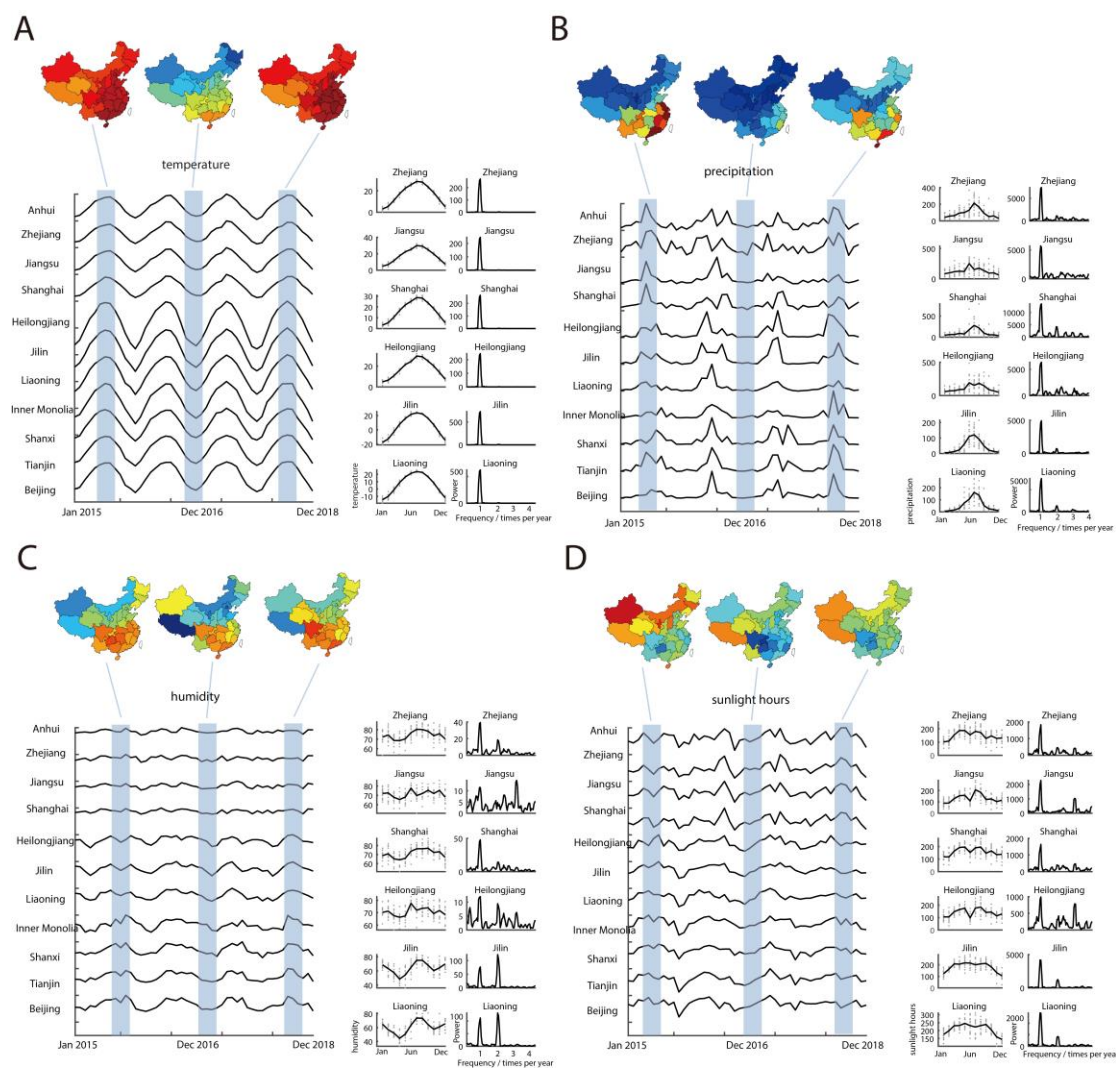

766

767 **Figure 2 Oscillatory patterns (power spectrum and tuning curves) of**  
 768 **various meteorological elements**

769 Panels A–D show the monthly time series of meteorological elements  
 770 (temperature, precipitation, humidity, and sunshine hours) and their  
 771 spectrogram from January 2005 to December 2018 in China. The geospatial  
 772 distribution of the infected cases in 31 provinces was shown in the topographic  
 773 map above each panel. The tuning curves and power spectrum of time series  
 774 data are shown on the right side in example provinces.

775

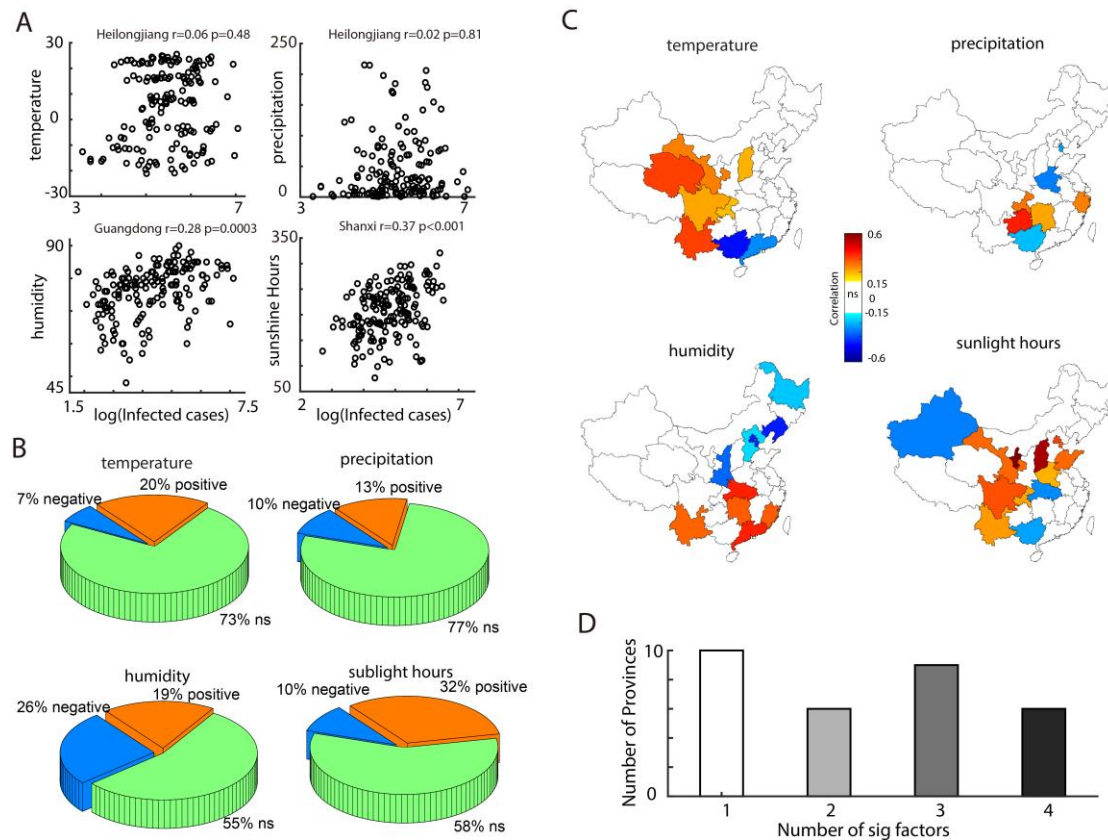

776

777 **Figure 3 Relationship between infected cases of scarlet fever epidemic**  
 778 **and meteorological elements**

779 A. Scatter plots illustrating the number of cases of scarlet fever in some  
 780 example provinces and temperature, precipitation, humidity, and sunshine  
 781 hours, respectively (Heilongjiang: northeast region, Guangdong: south region,  
 782 Shanxi, central region).

783 B. Pie chart shows the proportion of different types of correlations between  
 784 scarlet fever cases and four meteorological elements (Orange for positive  
 785 correlation, blue for negative correlation, green for no significant correlation).

786 C. Geospatial distribution of scarlet fever epidemics in provinces with significant  
 787 correlations to specific meteorological elements.

788 D. Count of provinces related to different significant numbers (from 1 to 4) of  
 789 meteorological factors.

790

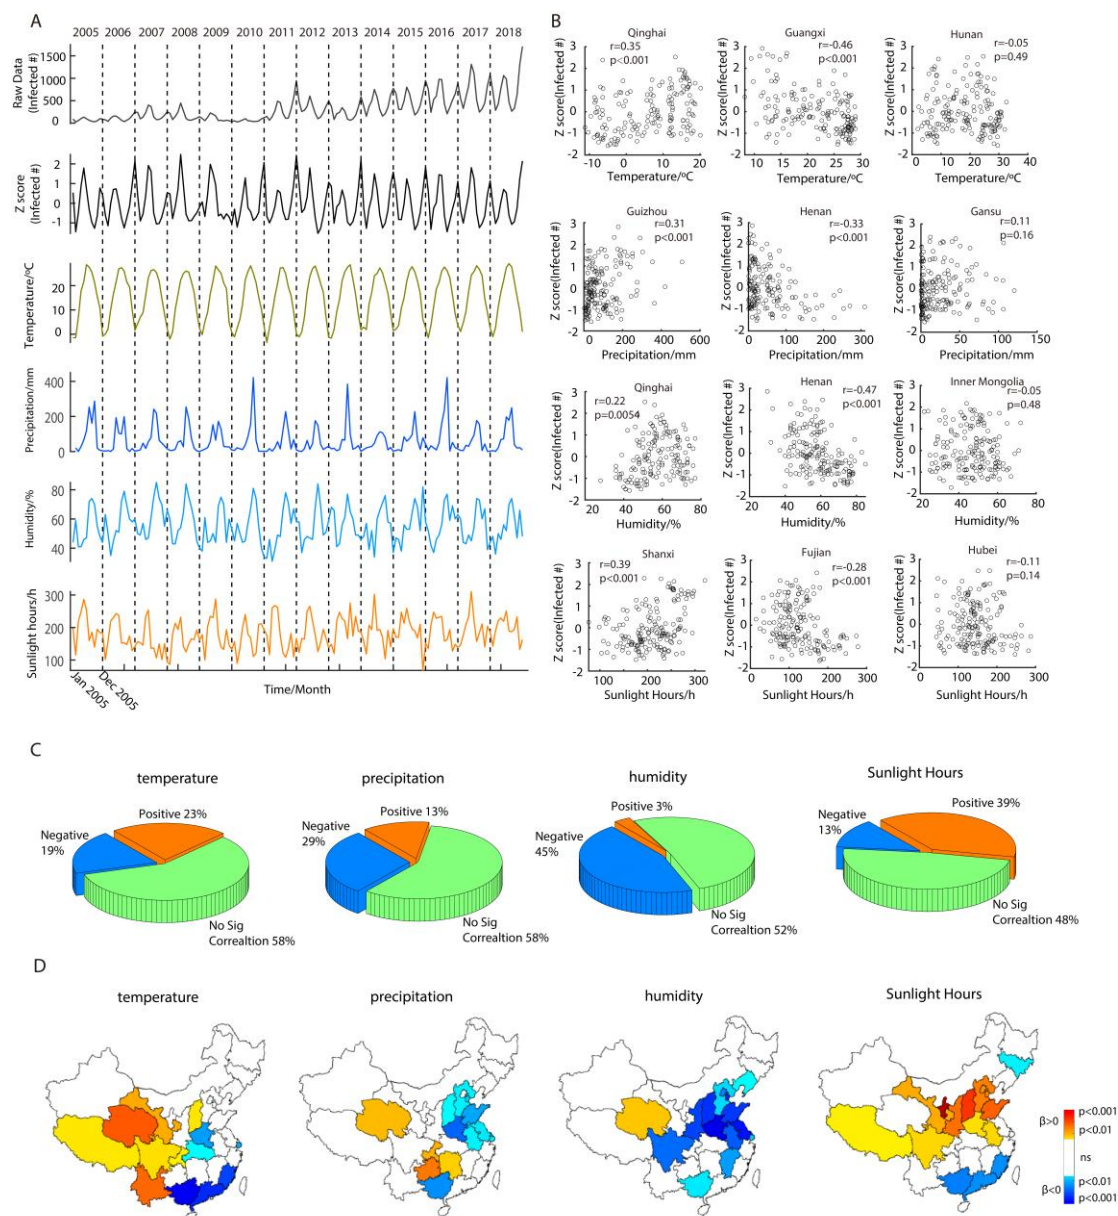

791

792 **Figure 4 Relationship between oscillation characteristics of scarlet fever**  
 793 **epidemic and meteorological elements**

794 A. The monthly incidences of scarlet fever, associated filtered time series data  
 795 and four meteorological elements (shown in different colors) in Shandong (as  
 796 an illustrative example).

797 B. Scatter plots illustrate the number of cases of scarlet fever in some example  
 798 provinces and temperature, precipitation, humidity, and sunshine hours,  
 799 respectively (Central region: Shanxi, Henan, Hubei; southwest region: Qinghai,  
 800 Guizhou; North region: inner Mongolia, Gansu; Southeast region: Fujian).

801 C. Pie chart shows the proportion of different types of correlations between

802 scarlet fever oscillations and four meteorological elements (Orange for positive  
803 correlation, blue for negative correlation, and green for no significant  
804 correlation).

805 D. Geospatial distribution of scarlet fever oscillations in provinces that have  
806 significant correlations with specific meteorological elements.

807  
808

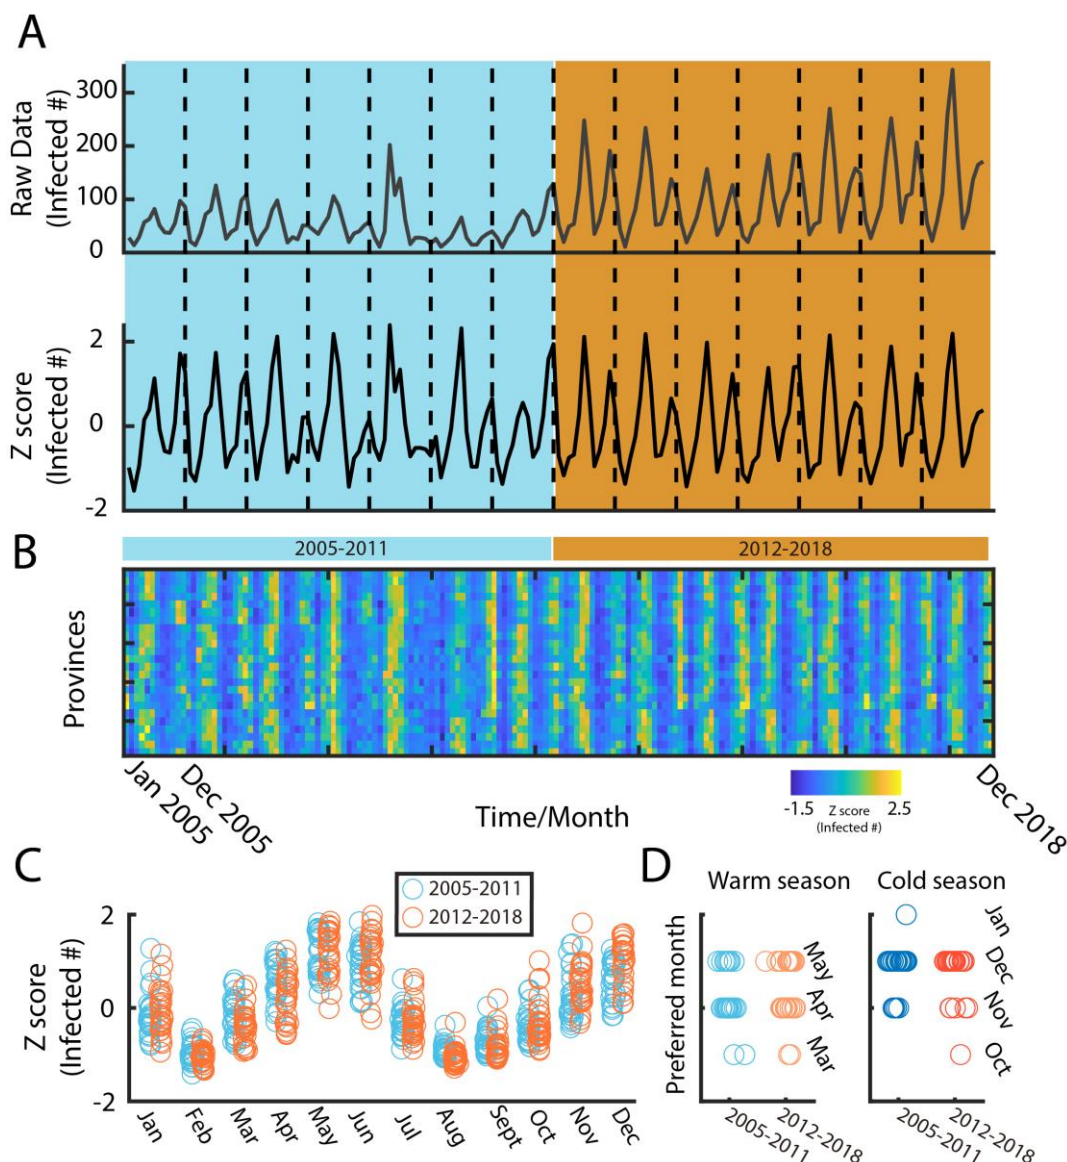

809

810 **Figure 5 Oscillation characteristics before and after 2011**

811 A. The monthly incidences of scarlet fever, associated filtered time series data  
812 in Gansu (as an illustrative example).

813 B. The monthly incidences of scarlet fever, associated filtered time series data

814 in multiple provinces (n=25).

815 C. The blue dots indicate the number of infected cases every month in year  
816 from 2005-2011, while orange dots indicate that in year from 2012-2018.

817 D. The peaking month of scarlet fever epidemics in warm and cold seasons for  
818 each province in year from 2005-2011, while orange dots indicate that in year  
819 from 2012-2018.

820

821

822 **Appendix-tables**

| City           | Selectivity | Dominance level | Peaking month (warm season) | Peaking month (cold season) |
|----------------|-------------|-----------------|-----------------------------|-----------------------------|
| Beijing        | 0.86        | 0.29            | May                         | Dec                         |
| Tianjin        | 0.89        | 0.13            | May                         | Dec                         |
| Hebei          | 0.82        | 0.09            | Jun                         | Dec                         |
| Shanxi         | 0.85        | 0.49            | Jun                         | Dec                         |
| Inner Mongolia | 0.88        | -0.10           | Jun                         | Nov                         |
| Liaoning       | 0.78        | -0.05           | Jun                         | Dec                         |
| Jilin          | 0.84        | -0.06           | Jun                         | Nov                         |
| Heilongjiang   | 0.85        | 0.01            | Jun                         | Dec                         |
| Shanghai       | 0.90        | 0.10            | May                         | Dec                         |
| Jiangsu        | 0.84        | 0.25            | May                         | Dec                         |
| Zhejiang       | 0.80        | 0.39            | May                         | Dec                         |
| Anhui          | 0.81        | 0.23            | May                         | Dec                         |
| Fujian         | 0.71        | 0.28            | May                         | Dec                         |
| Jiangxi        | 0.69        | -0.24           | May                         | Dec                         |
| Shandong       | 0.80        | -0.07           | May                         | Dec                         |
| Henan          | 0.74        | -0.18           | May                         | Dec                         |
| Hubei          | 0.78        | -0.11           | May                         | Dec                         |
| Hunan          | 0.76        | 0.18            | May                         | Dec                         |
| Guangdong      | 0.78        | 0.02            | Apr                         | Jan                         |
| Guangxi        | 0.77        | -0.30           | May                         | Dec                         |
| Hainan         | 0.84        | 0.49            | Apr                         | Jan                         |
| Chongqing      | 0.83        | 0.70            | Jun                         | Nov                         |
| Sichuan        | 0.76        | 0.52            | May                         | Dec                         |
| Guizhou        | 0.70        | 0.32            | May                         | Dec                         |
| Yunnan         | 0.81        | 0.64            | May                         | Dec                         |
| Xizang         | 0.91        | 0.26            | Apr                         | Oct                         |
| Shaanxi        | 0.80        | 0.15            | May                         | Dec                         |
| Gansu          | 0.89        | 0.36            | Jun                         | Nov                         |
| Qinghai        | 0.89        | 0.42            | Jun                         | Dec                         |
| Ningxia        | 0.91        | 0.68            | Jun                         | Dec                         |
| Xinjiang       | 0.86        | -0.29           | Jun                         | Nov                         |

823 **Table 1 Descriptive statistics of periodic phenomena of scarlet fever**  
824 **epidemics.**

825 *Note.* In China, *Spring* = March, April & May. *Summer* = June, July & August.  
826 *Autumn* = September, October & November. *Winter* = December, January &  
827 February.

828

829 **Table 2 Relationship between infected cases of scarlet fever epidemic and**  
830 **meteorological elements.**

|                | Tempearture |          | Percipitation |          | Humidity |          | Sunshine hours |          |
|----------------|-------------|----------|---------------|----------|----------|----------|----------------|----------|
|                | <i>r</i>    | <i>p</i> | <i>r</i>      | <i>p</i> | <i>r</i> | <i>p</i> | <i>r</i>       | <i>p</i> |
| Beijing        | 0.05        | 0.51     | 0.08          | 0.32     | 0.24     | 0.00     | 0.25           | 0.00     |
| Tianjin        | -0.02       | 0.77     | 0.17          | 0.04     | 0.32     | 0.00     | 0.23           | 0.00     |
| Hebei          | 0.09        | 0.25     | 0.11          | 0.16     | 0.12     | 0.11     | 0.11           | 0.17     |
| Shanxi         | 0.16        | 0.04     | 0.12          | 0.14     | 0.24     | 0.00     | 0.37           | 0.00     |
| Inner Mongolia | 0.01        | 0.85     | 0.05          | 0.54     | 0.02     | 0.75     | -0.05          | 0.52     |
| Liaoning       | -0.04       | 0.61     | 0.13          | 0.08     | 0.20     | 0.01     | -0.02          | 0.77     |
| Jilin          | 0.01        | 0.89     | 0.09          | 0.23     | 0.12     | 0.11     | -0.03          | 0.66     |
| Heilongjiang   | 0.06        | 0.48     | 0.02          | 0.81     | 0.07     | 0.39     | -0.08          | 0.32     |
| Shanghai       | -0.15       | 0.05     | 0.00          | 0.98     | 0.06     | 0.47     | -0.06          | 0.43     |
| Jiangsu        | -0.07       | 0.36     | 0.02          | 0.82     | 0.12     | 0.11     | 0.04           | 0.60     |
| Zhejiang       | -0.03       | 0.69     | 0.20          | 0.01     | 0.08     | 0.28     | -0.10          | 0.18     |
| Anhui          | -0.06       | 0.48     | 0.00          | 1.00     | 0.05     | 0.52     | -0.04          | 0.63     |
| Fujian         | -0.10       | 0.21     | 0.02          | 0.83     | 0.21     | 0.01     | -0.13          | 0.10     |
| Jiangxi        | -0.06       | 0.41     | 0.01          | 0.89     | 0.04     | 0.57     | -0.04          | 0.63     |
| Shandong       | -0.08       | 0.30     | 0.15          | 0.06     | 0.17     | 0.02     | 0.22           | 0.00     |
| Henan          | -0.12       | 0.12     | 0.20          | 0.01     | 0.27     | 0.00     | 0.16           | 0.04     |
| Hubei          | -0.11       | 0.14     | 0.03          | 0.66     | 0.30     | 0.00     | -0.19          | 0.02     |
| Hunan          | -0.03       | 0.74     | 0.17          | 0.03     | 0.27     | 0.00     | -0.09          | 0.23     |
| Guangdong      | -0.19       | 0.01     | 0.02          | 0.84     | 0.28     | 0.00     | -0.09          | 0.27     |
| Guangxi        | -0.29       | 0.00     | 0.15          | 0.05     | 0.02     | 0.80     | -0.17          | 0.03     |
| Hainan         | -0.11       | 0.52     | 0.09          | 0.62     | 0.08     | 0.65     | 0.03           | 0.87     |
| Chongqing      | 0.15        | 0.05     | 0.21          | 0.01     | 0.09     | 0.24     | 0.17           | 0.03     |
| Sichuan        | 0.17        | 0.03     | 0.02          | 0.79     | 0.19     | 0.01     | 0.24           | 0.00     |
| Guizhou        | 0.11        | 0.14     | 0.28          | 0.00     | 0.23     | 0.00     | -0.07          | 0.38     |
| Yunnan         | 0.25        | 0.00     | 0.15          | 0.07     | 0.00     | 0.95     | 0.18           | 0.02     |
| Xizang         | 0.13        | 0.10     | 0.00          | 0.99     | 0.12     | 0.14     | 0.08           | 0.29     |
| Shaanxi        | 0.04        | 0.58     | 0.09          | 0.27     | 0.24     | 0.00     | 0.14           | 0.08     |
| Gansu          | 0.20        | 0.01     | 0.11          | 0.16     | 0.06     | 0.44     | 0.22           | 0.00     |
| Qinghai        | 0.25        | 0.00     | 0.12          | 0.14     | 0.16     | 0.04     | 0.06           | 0.45     |
| Ningxia        | 0.33        | 0.12     | 0.02          | 0.92     | 0.24     | 0.25     | 0.55           | 0.01     |
| Xinjiang       | -0.06       | 0.47     | 0.16          | 0.06     | 0.15     | 0.07     | -0.20          | 0.02     |

831 *Note.* *r* = correlation coefficient (Pearson), *p* = significance level.

832



833

834 **Table 3 Relationship between oscillation characteristics of scarlet fever**  
 835 **epidemic and meteorological elements.**

|                | Temperature |          | Precipitation |          | Humidity |          | Sunshine hours |          |
|----------------|-------------|----------|---------------|----------|----------|----------|----------------|----------|
|                | <i>r</i>    | <i>p</i> | <i>r</i>      | <i>p</i> | <i>r</i> | <i>p</i> | <i>r</i>       | <i>p</i> |
| Beijing        | 0.04        | 0.62     | -0.13         | 0.08     | -0.29    | 0.00     | 0.28           | 0.00     |
| Tianjin        | -0.02       | 0.78     | -0.19         | 0.01     | -0.40    | 0.00     | 0.29           | 0.00     |
| Hebei          | 0.12        | 0.12     | -0.16         | 0.04     | -0.19    | 0.01     | 0.30           | 0.00     |
| Shanxi         | 0.18        | 0.02     | -0.15         | 0.05     | -0.39    | 0.00     | 0.39           | 0.00     |
| Inner Mongolia | 0.05        | 0.52     | -0.06         | 0.07     | -0.05    | 0.48     | -0.03          | 0.72     |
| Liaoning       | -0.05       | 0.52     | -0.09         | 0.06     | -0.15    | 0.05     | -0.05          | 0.50     |
| Jilin          | 0.03        | 0.67     | -0.04         | 0.04     | -0.11    | 0.16     | -0.16          | 0.04     |
| Heilongjiang   | 0.07        | 0.38     | 0.10          | 0.03     | -0.08    | 0.31     | -0.11          | 0.16     |
| Shanghai       | -0.24       | 0.00     | -0.17         | 0.03     | -0.21    | 0.01     | -0.04          | 0.60     |
| Jiangsu        | -0.10       | 0.19     | -0.17         | 0.03     | -0.43    | 0.00     | 0.13           | 0.11     |
| Zhejiang       | -0.01       | 0.88     | 0.08          | 0.08     | -0.13    | 0.08     | 0.00           | 0.99     |
| Anhui          | -0.12       | 0.12     | -0.16         | 0.04     | -0.34    | 0.00     | 0.20           | 0.01     |
| Fujian         | -0.37       | 0.00     | -0.05         | 0.02     | 0.08     | 0.31     | -0.28          | 0.00     |
| Jiangxi        | -0.19       | 0.12     | -0.13         | 0.06     | -0.26    | 0.02     | -0.01          | 0.94     |
| Shandong       | -0.13       | 0.10     | -0.25         | 0.00     | -0.38    | 0.00     | 0.34           | 0.00     |
| Henan          | -0.26       | 0.00     | -0.33         | 0.00     | -0.47    | 0.00     | 0.19           | 0.01     |
| Hubei          | -0.15       | 0.05     | 0.04          | 0.03     | -0.11    | 0.15     | -0.11          | 0.14     |
| Hunan          | -0.05       | 0.49     | 0.21          | 0.01     | -0.07    | 0.34     | -0.06          | 0.45     |
| Guangdong      | -0.40       | 0.00     | -0.06         | 0.04     | -0.08    | 0.32     | -0.28          | 0.00     |
| Guangxi        | -0.46       | 0.00     | -0.28         | 0.00     | -0.17    | 0.02     | -0.30          | 0.00     |
| Hainan         | -0.23       | 0.12     | -0.13         | 0.06     | -0.02    | 0.87     | -0.14          | 0.34     |
| Chongqing      | 0.17        | 0.03     | 0.24          | 0.00     | 0.02     | 0.81     | 0.12           | 0.12     |
| Sichuan        | 0.19        | 0.01     | -0.08         | 0.08     | -0.32    | 0.00     | 0.20           | 0.01     |

|          |       |      |      |     |       |      |       |      |
|----------|-------|------|------|-----|-------|------|-------|------|
|          |       |      | 0.02 | 1   |       |      |       |      |
| Guizhou  | 0.14  | 0.06 | 0.31 | 0.0 | 0.03  | 0.74 | -0.09 | 0.25 |
| Yunnan   | 0.33  | 0.00 | 0.03 | 0.6 | -0.14 | 0.08 | 0.15  | 0.06 |
| Xizang   | 0.18  | 0.02 | 0.06 | 0.4 | 0.14  | 0.07 | 0.17  | 0.03 |
| Shaanxi  | 0.14  | 0.07 | -    | 0.2 | -0.37 | 0.00 | 0.32  | 0.00 |
| Gansu    | 0.25  | 0.00 | 0.11 | 0.1 | 0.00  | 0.99 | 0.25  | 0.00 |
| Qinghai  | 0.35  | 0.00 | 0.23 | 0.0 | 0.22  | 0.01 | 0.14  | 0.09 |
| Ningxia  | 0.32  | 0.12 | 0.00 | 0.9 | -0.24 | 0.27 | 0.54  | 0.01 |
| Xinjiang | -0.05 | 0.58 | 0.15 | 0.0 | 0.10  | 0.24 | -0.13 | 0.11 |

836 *Note.*  $r$  = correlation coefficient (Pearson),  $p$  = significance level.

837

838

839

840

841

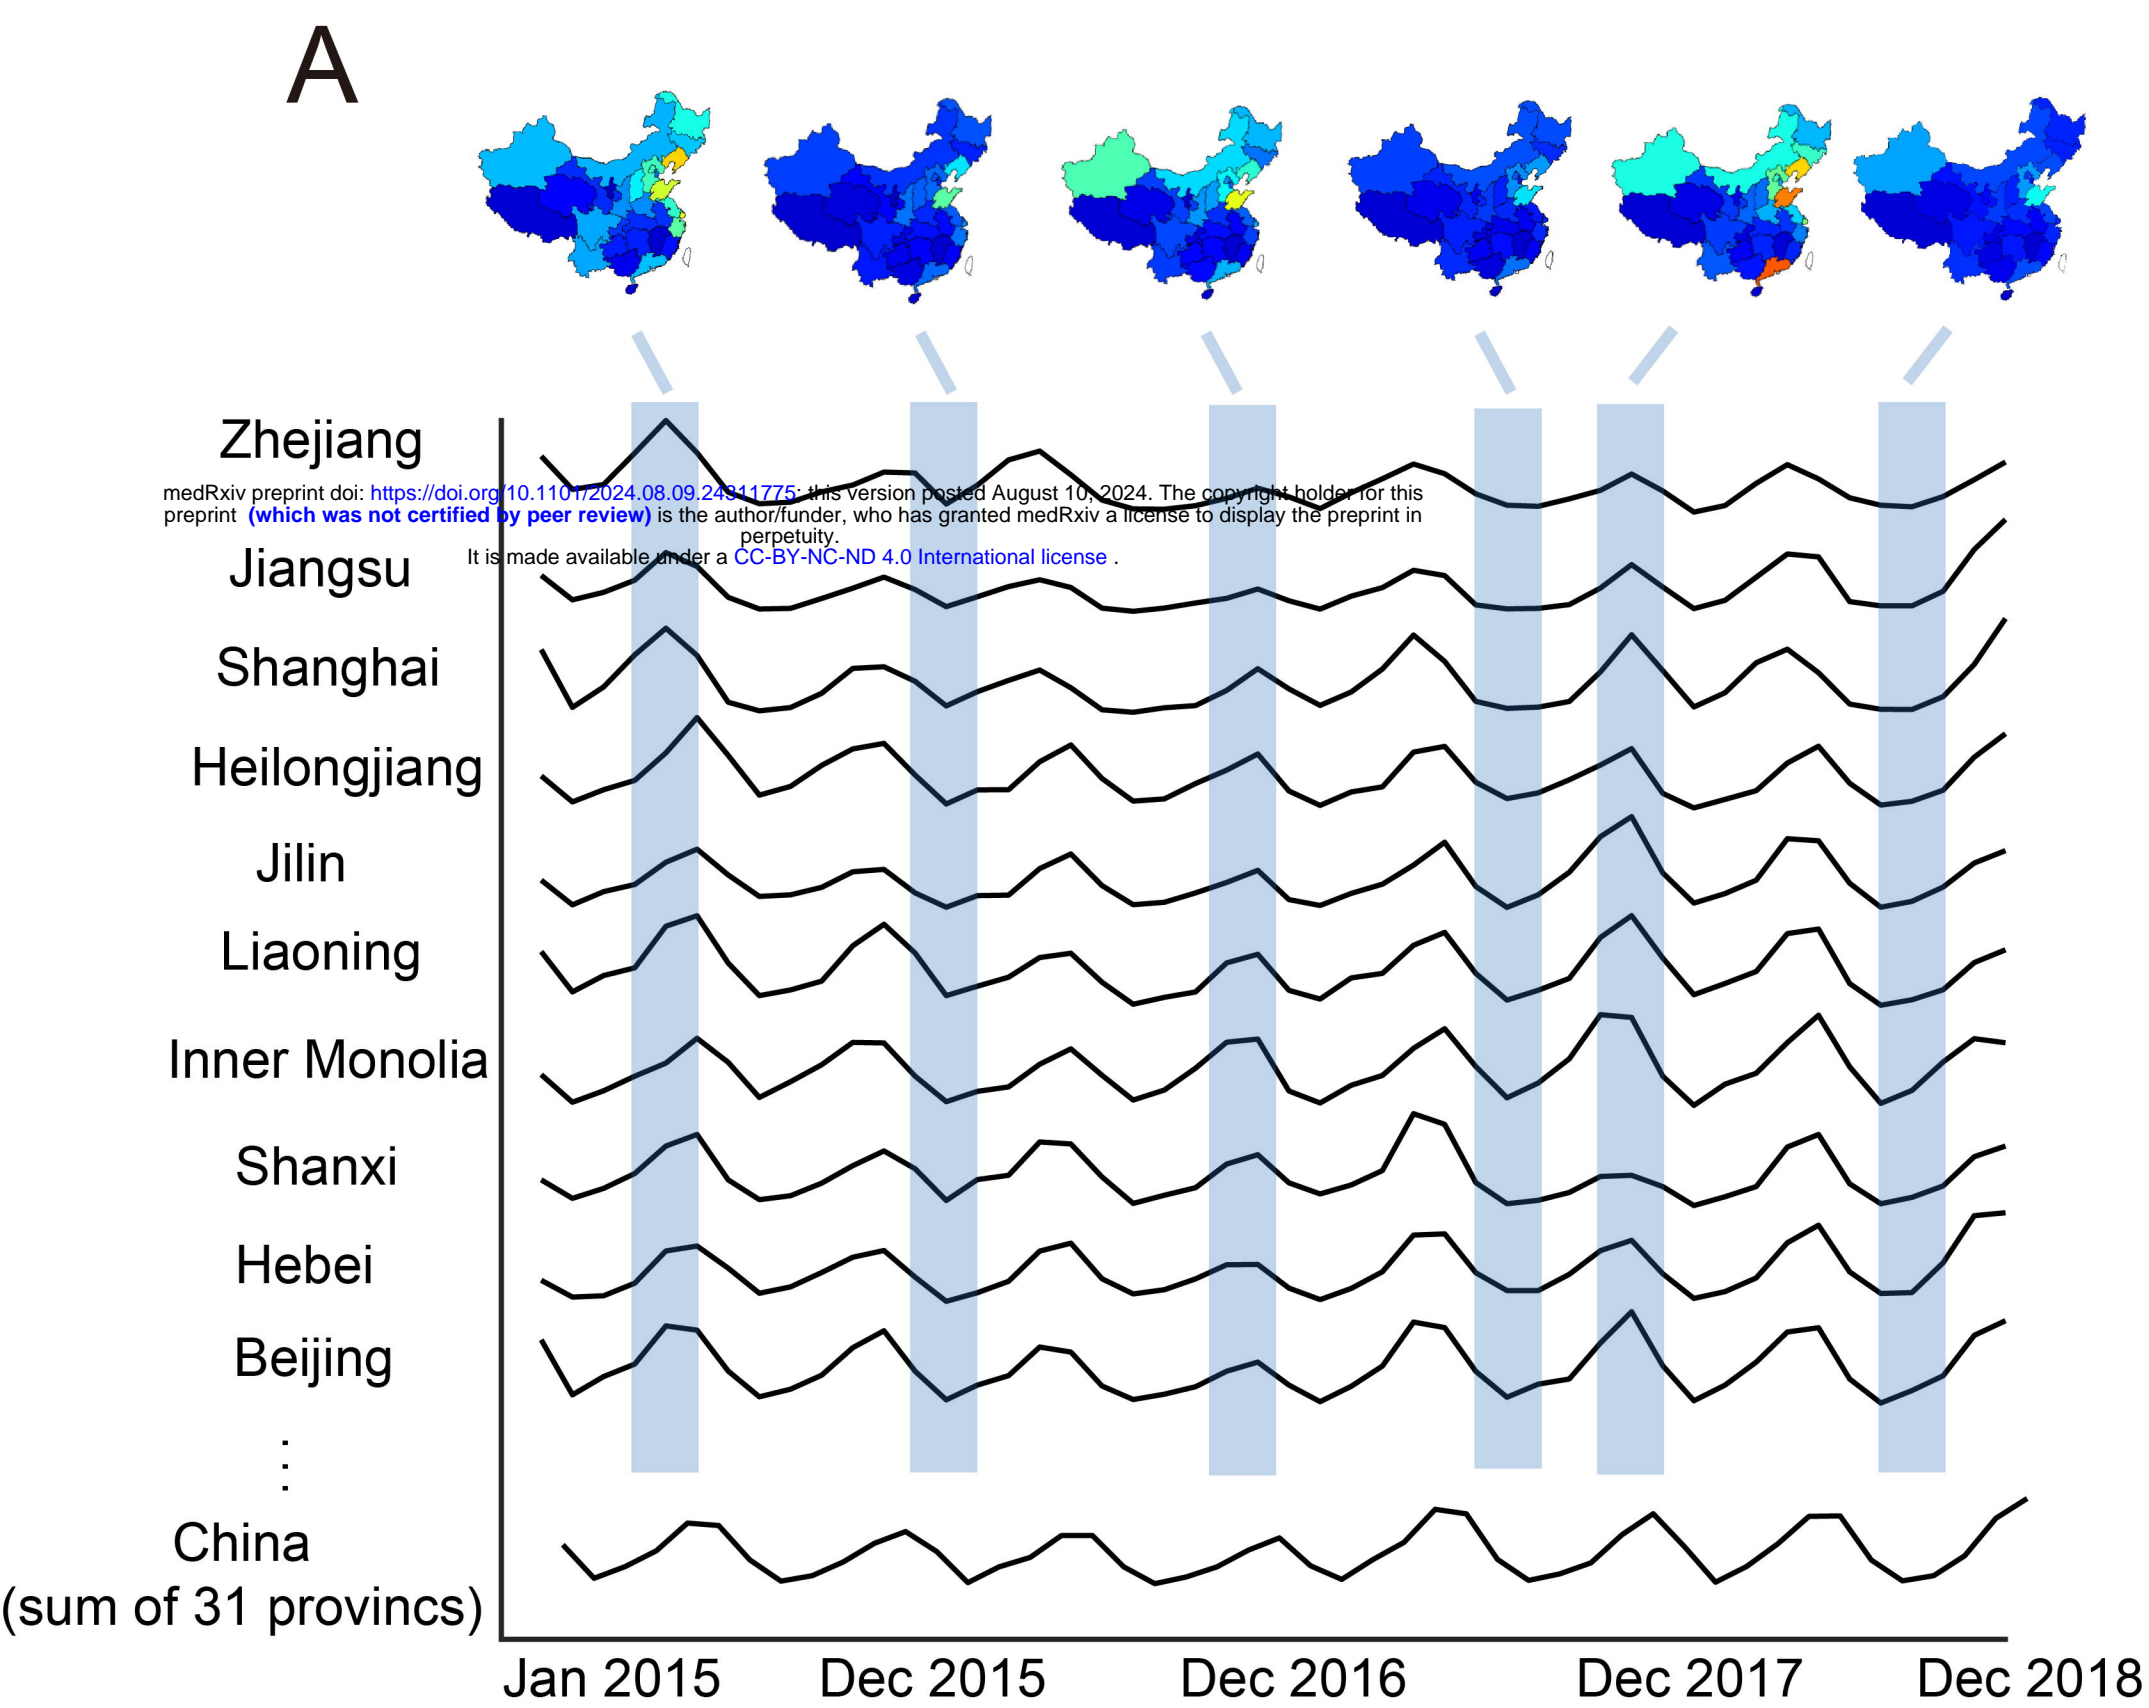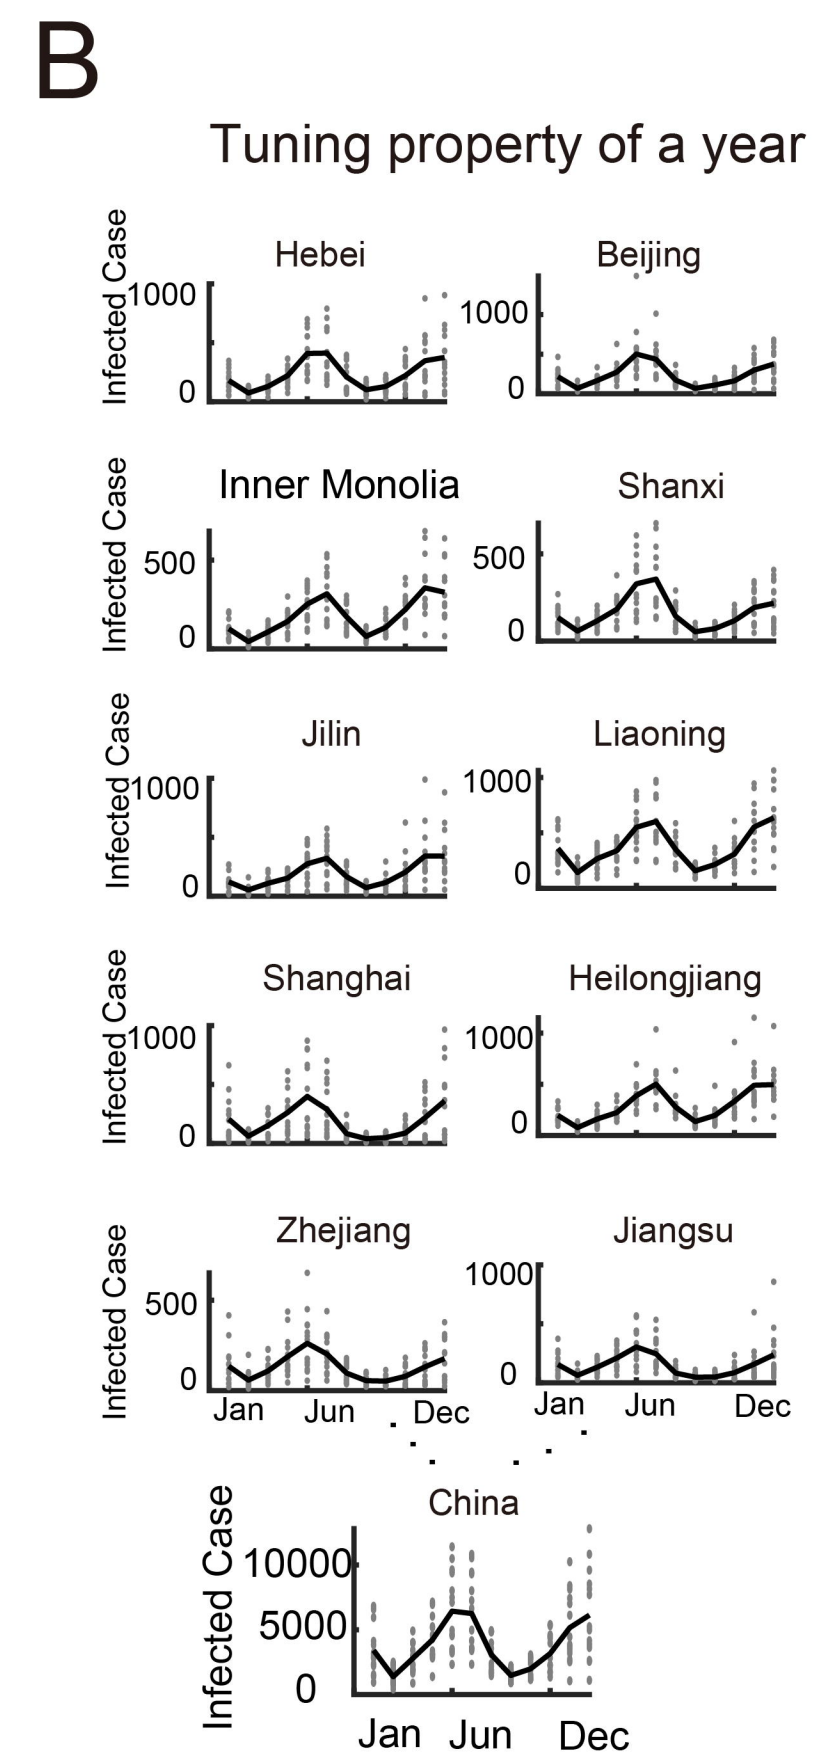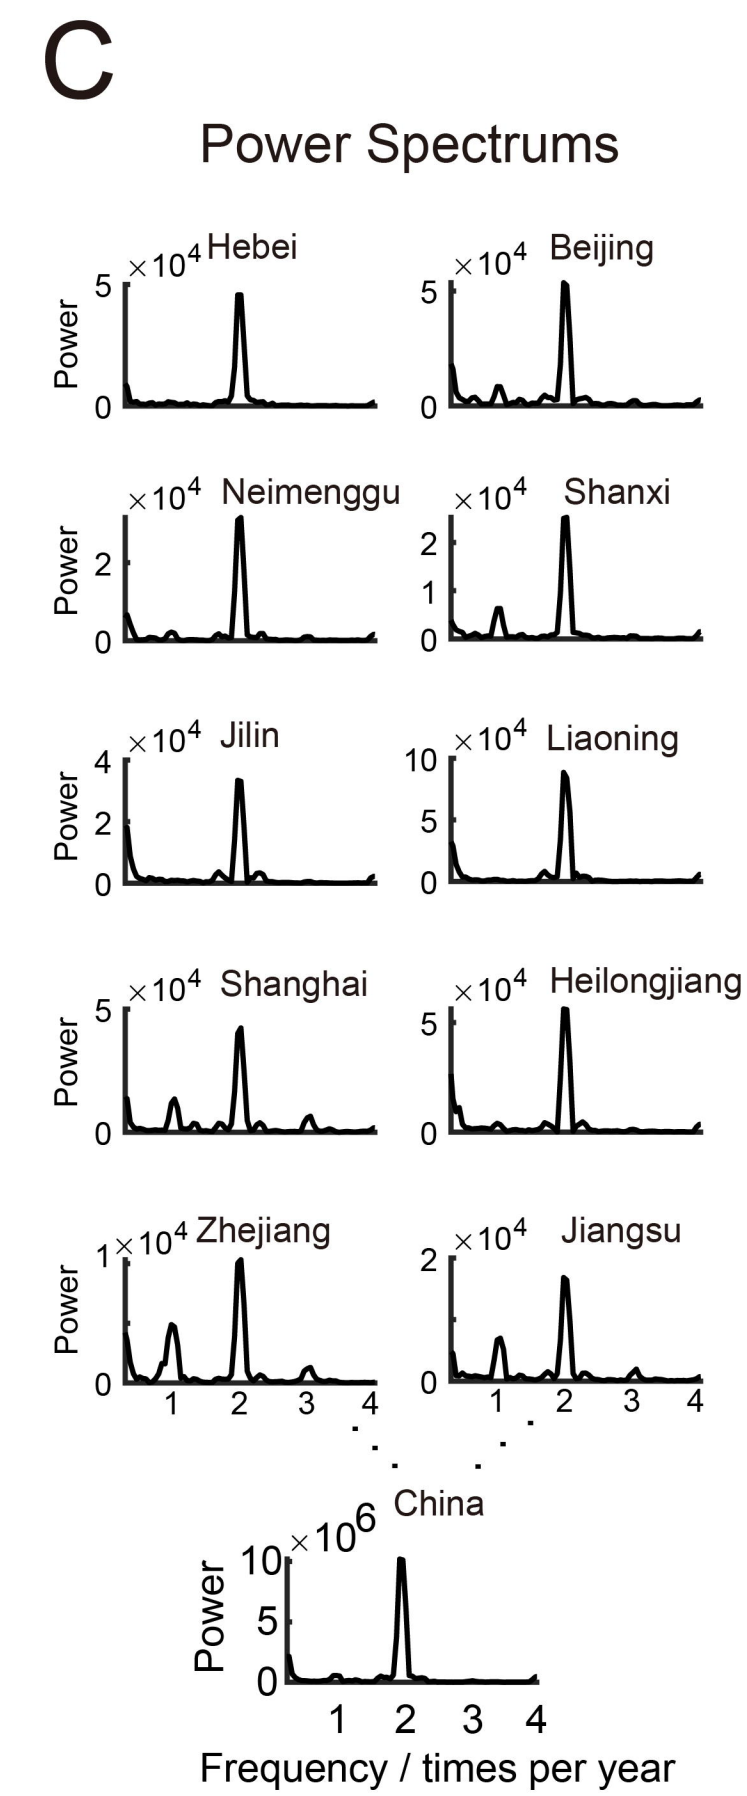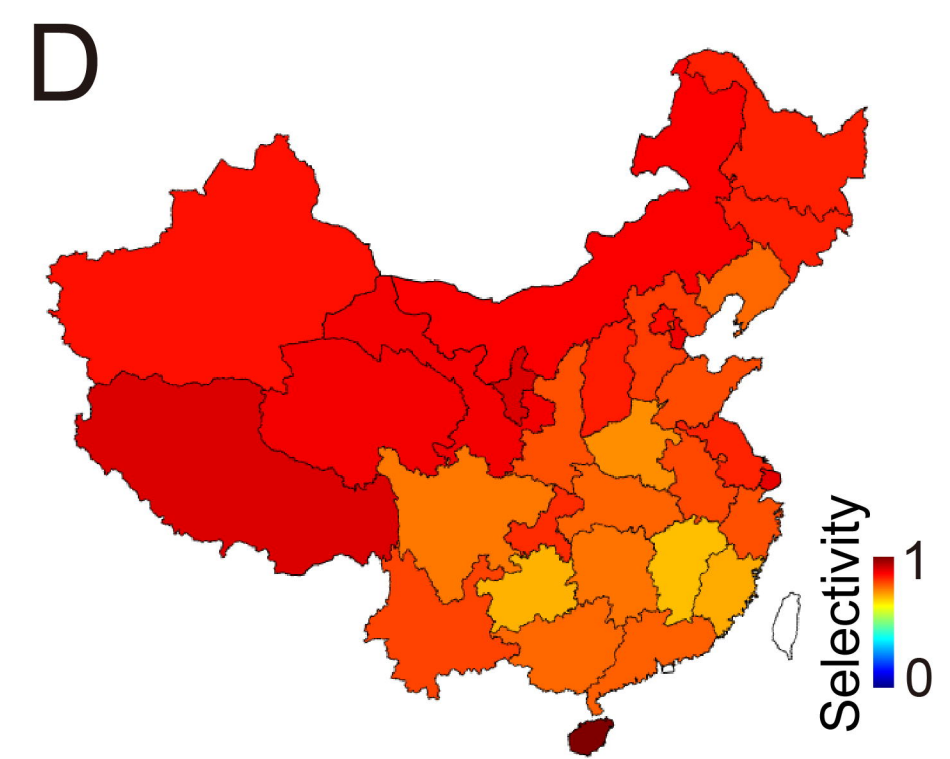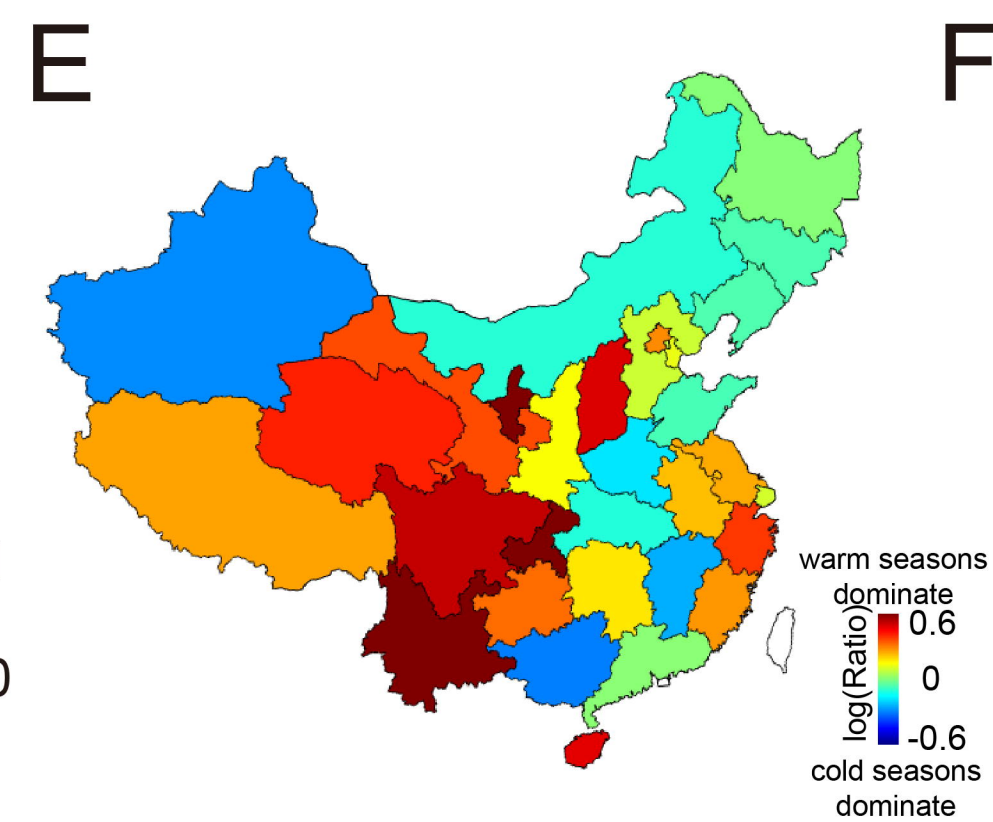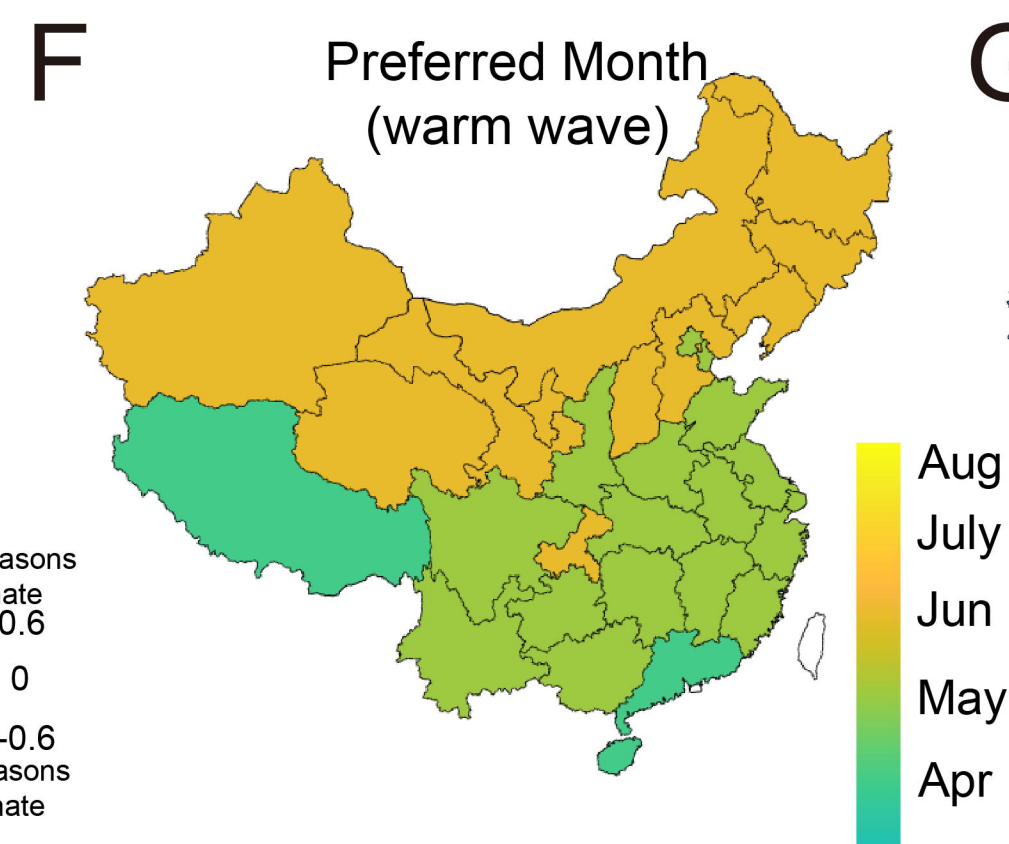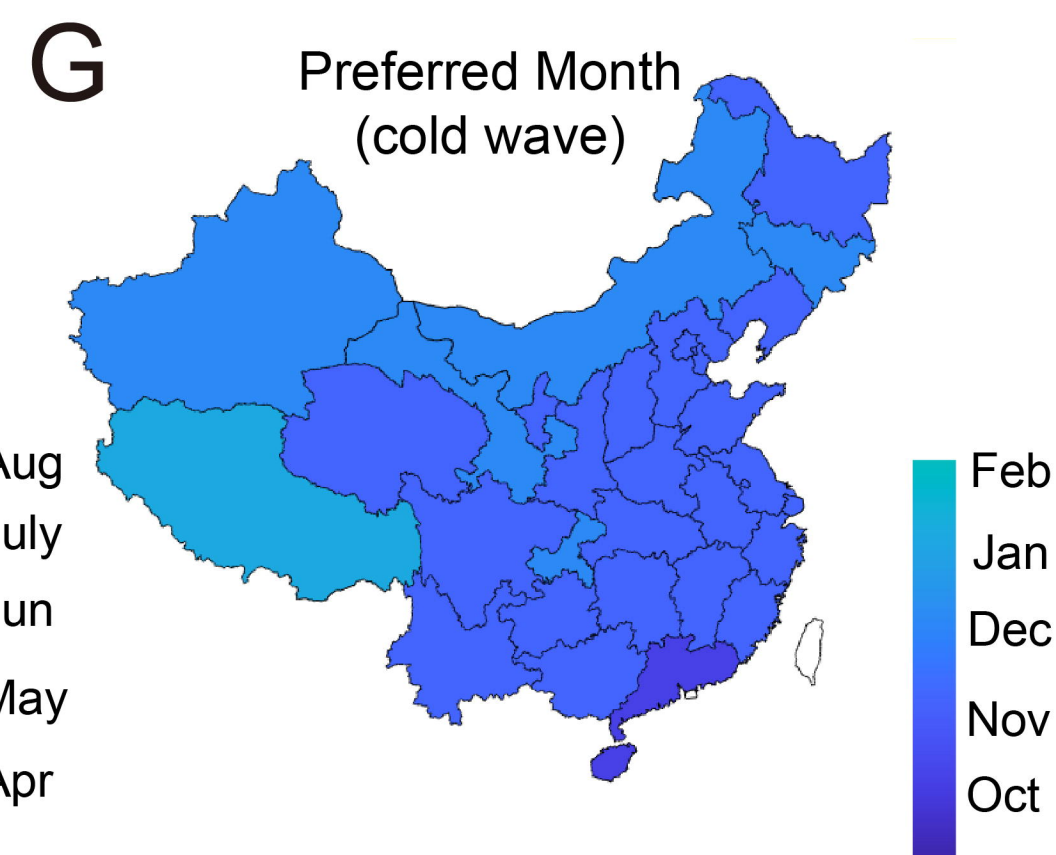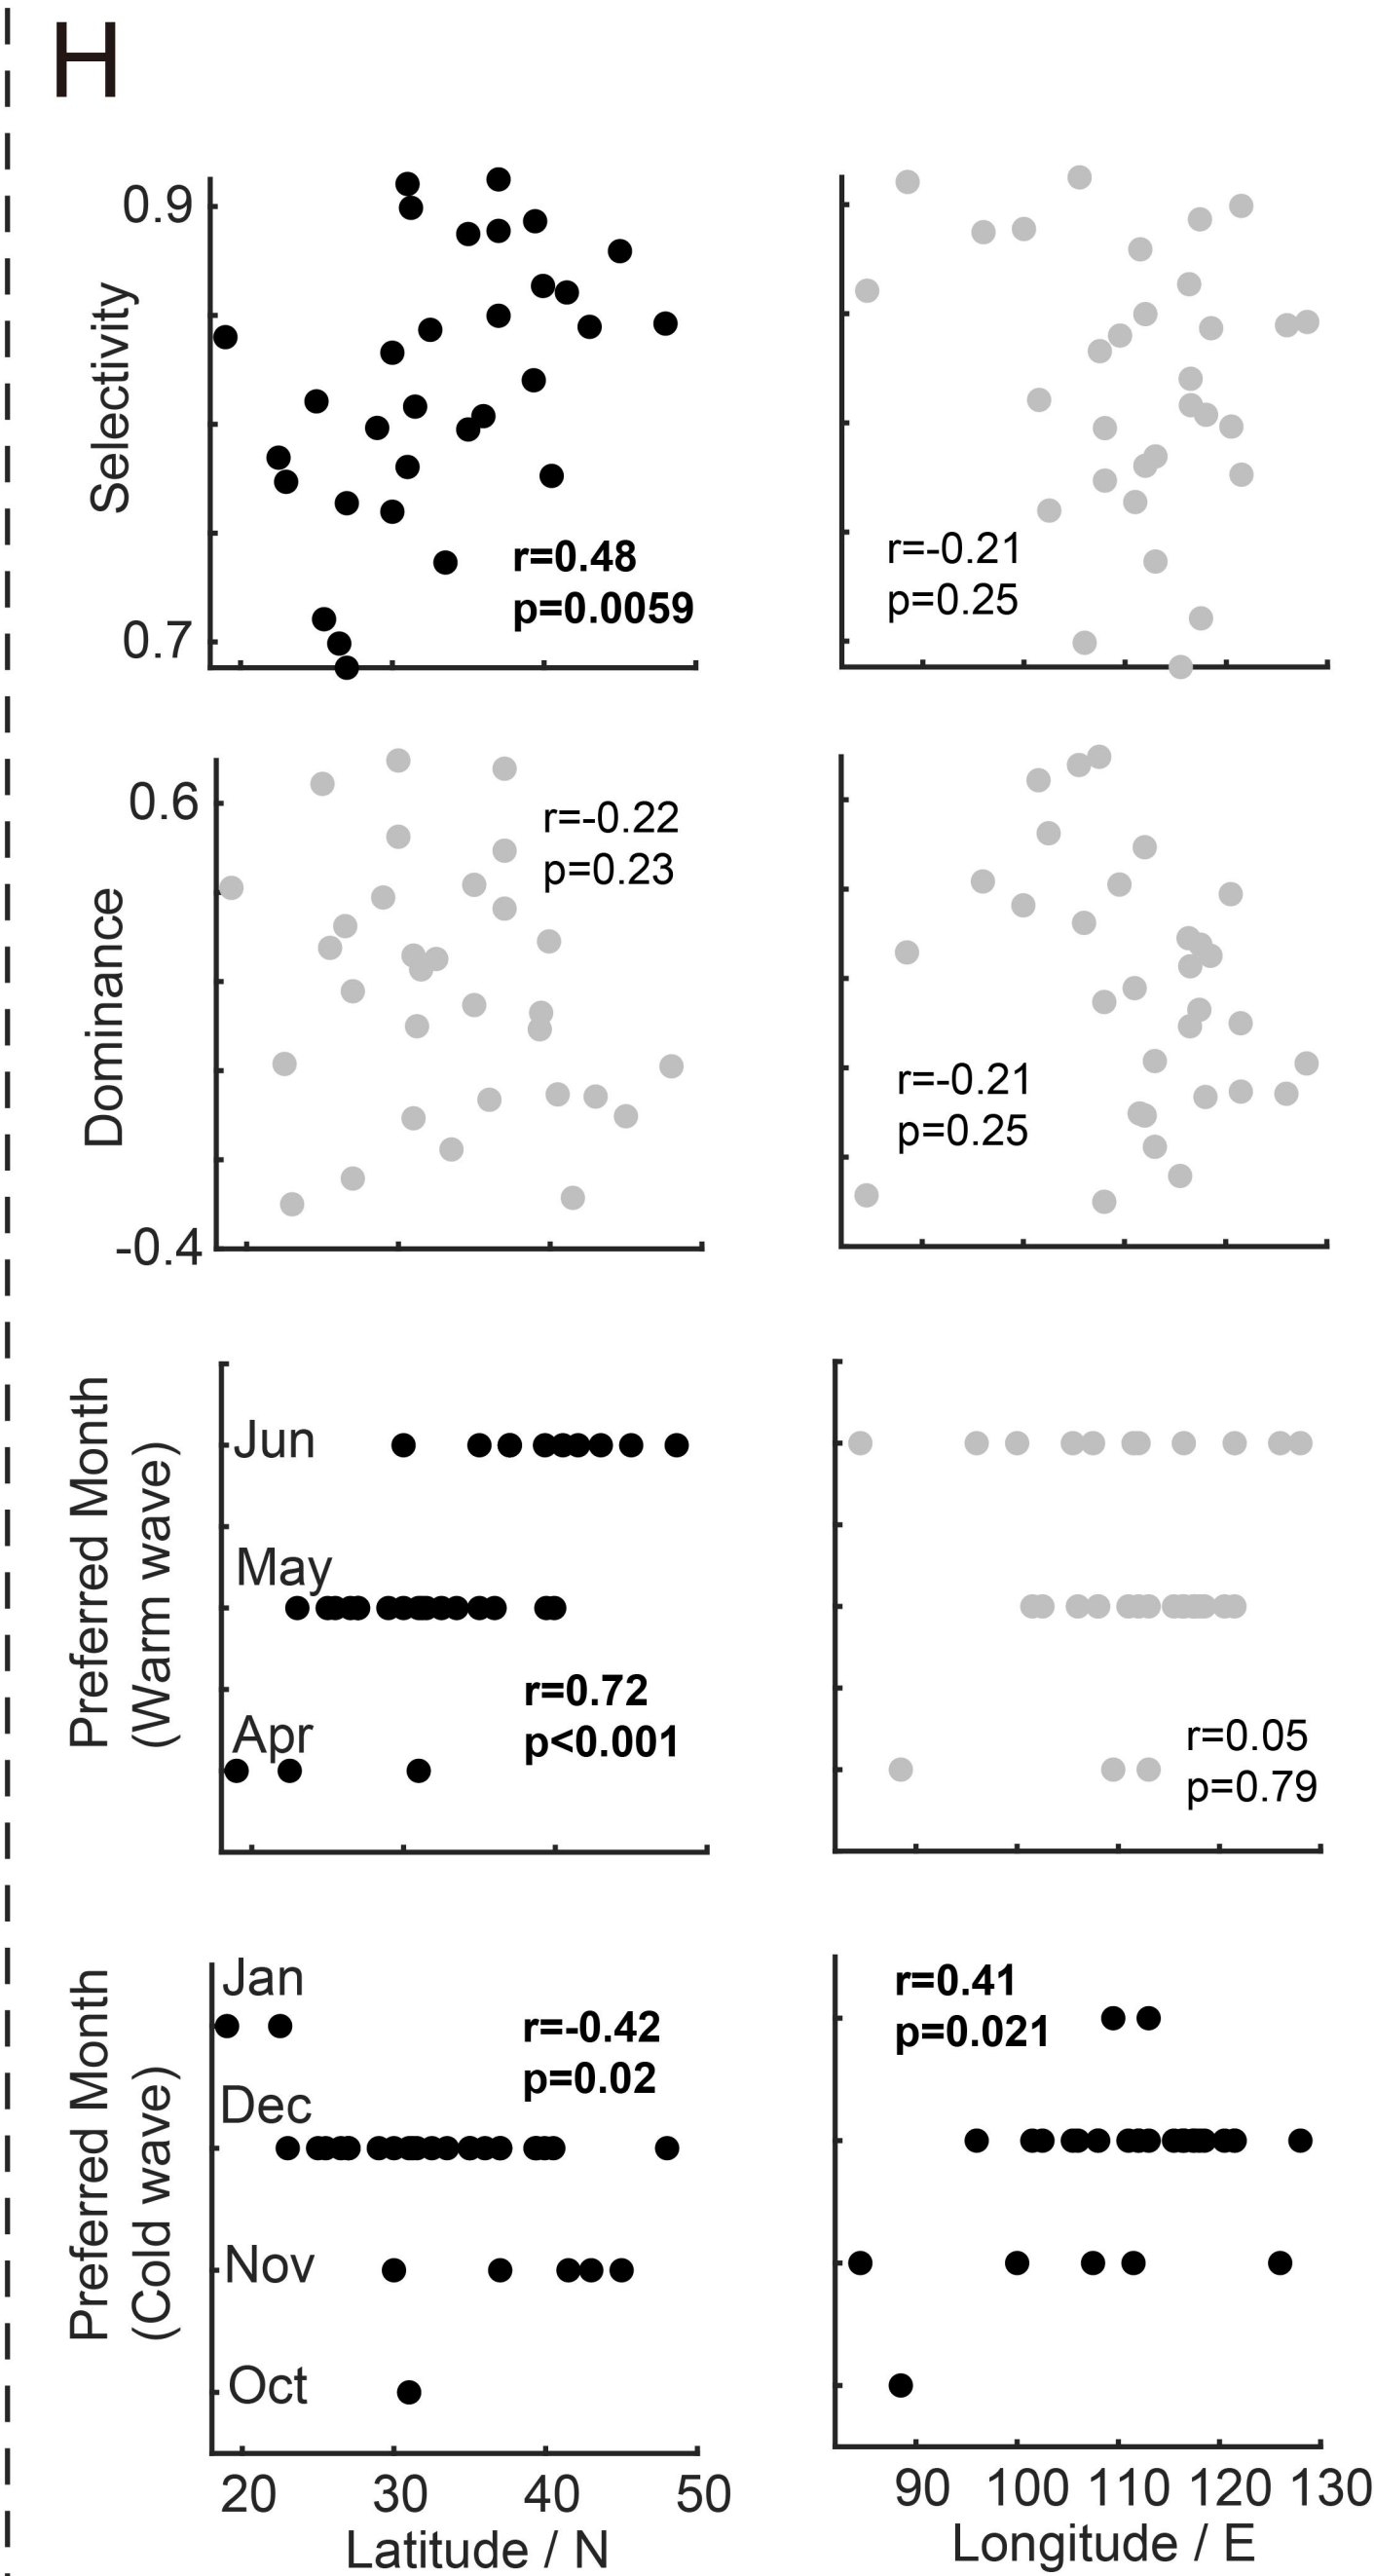

**A**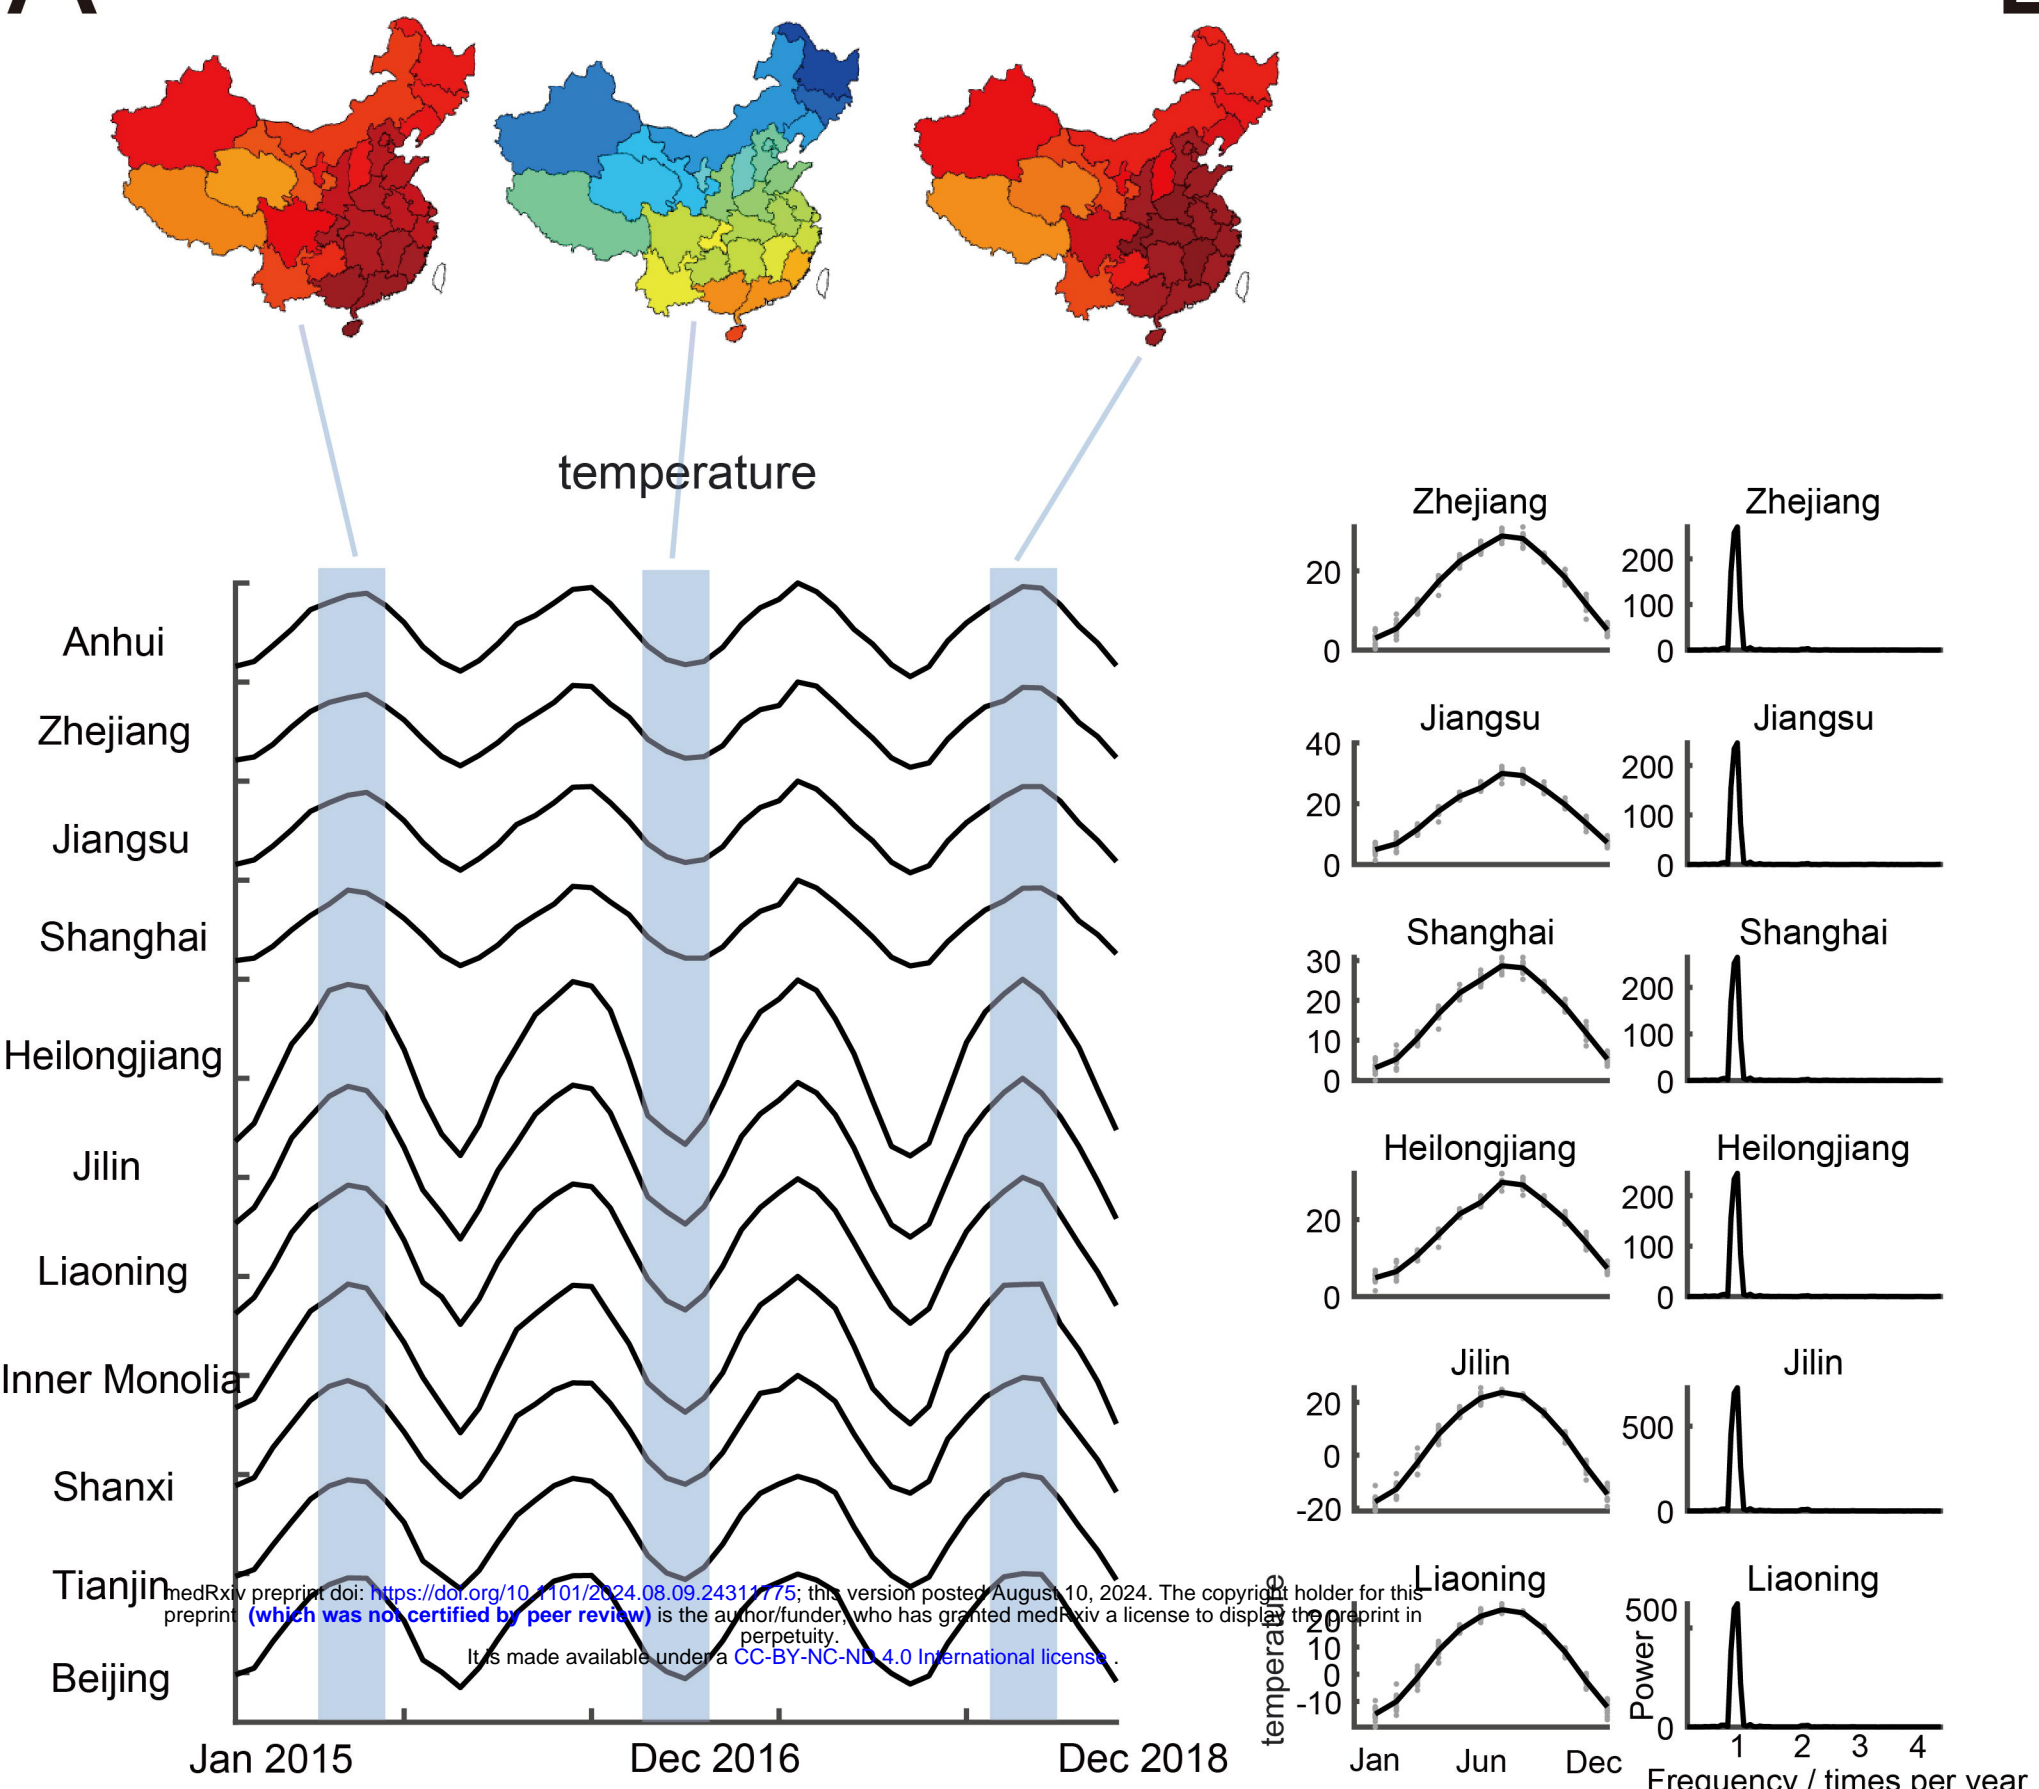**B**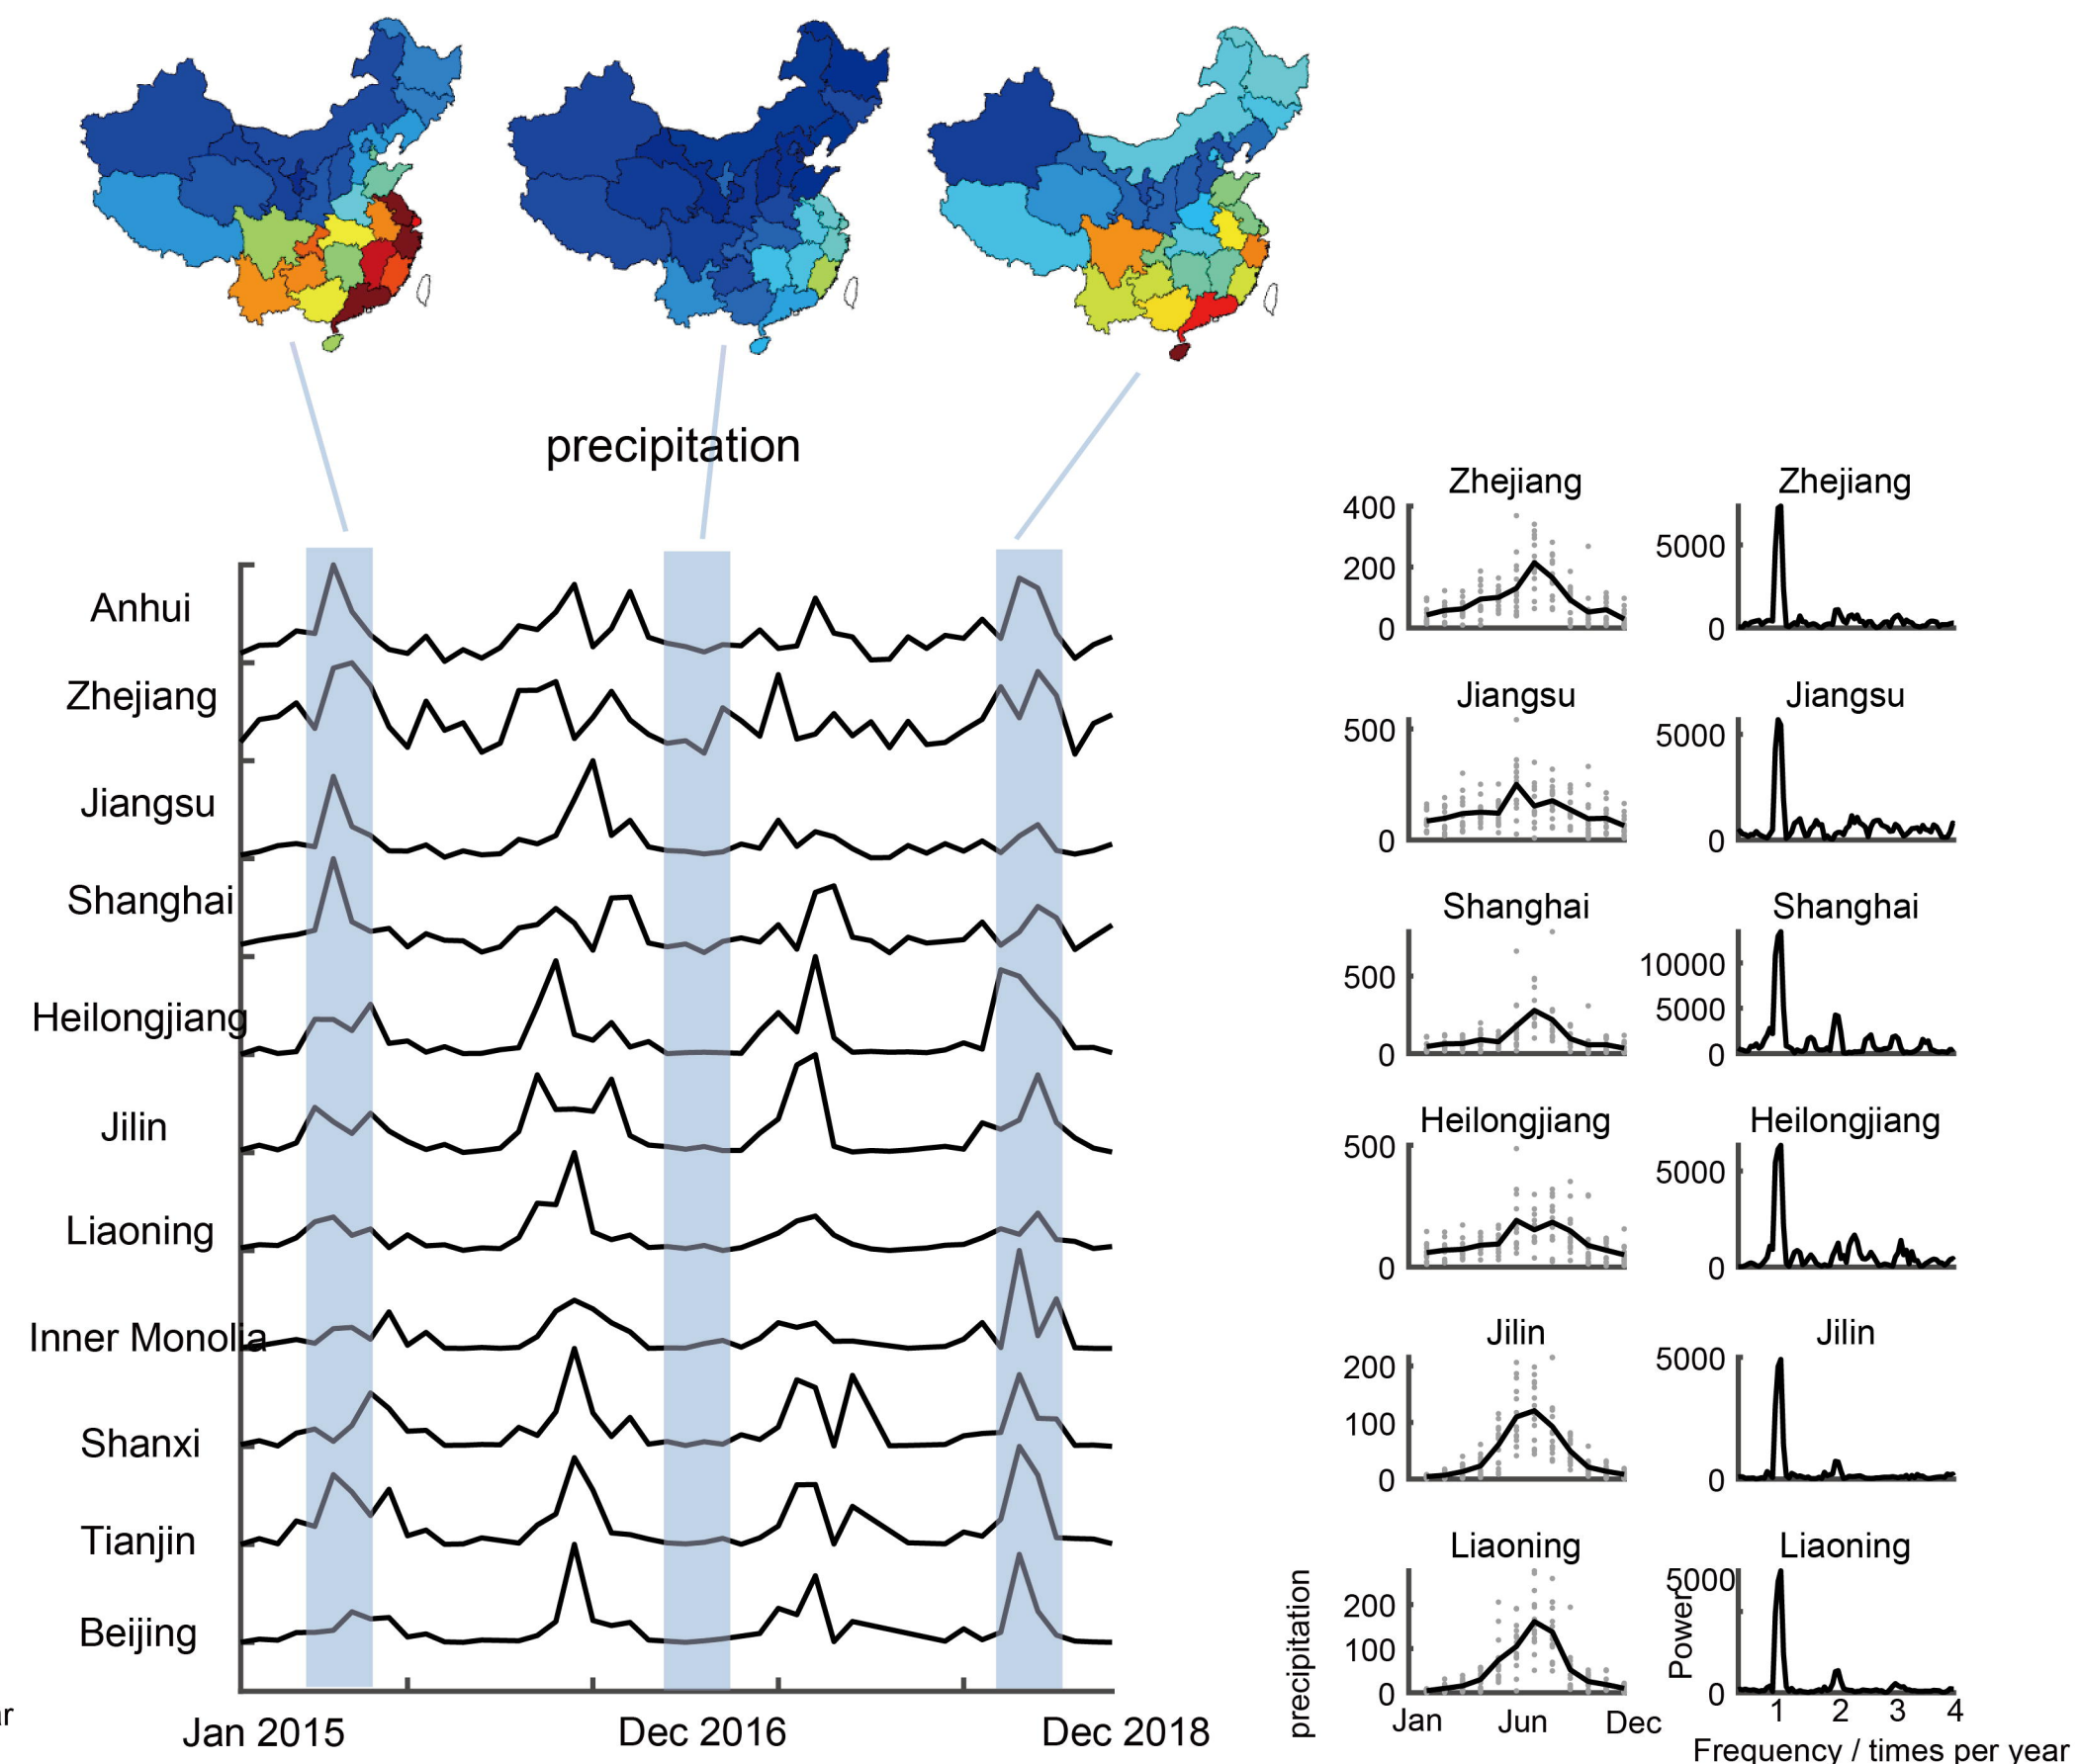**C**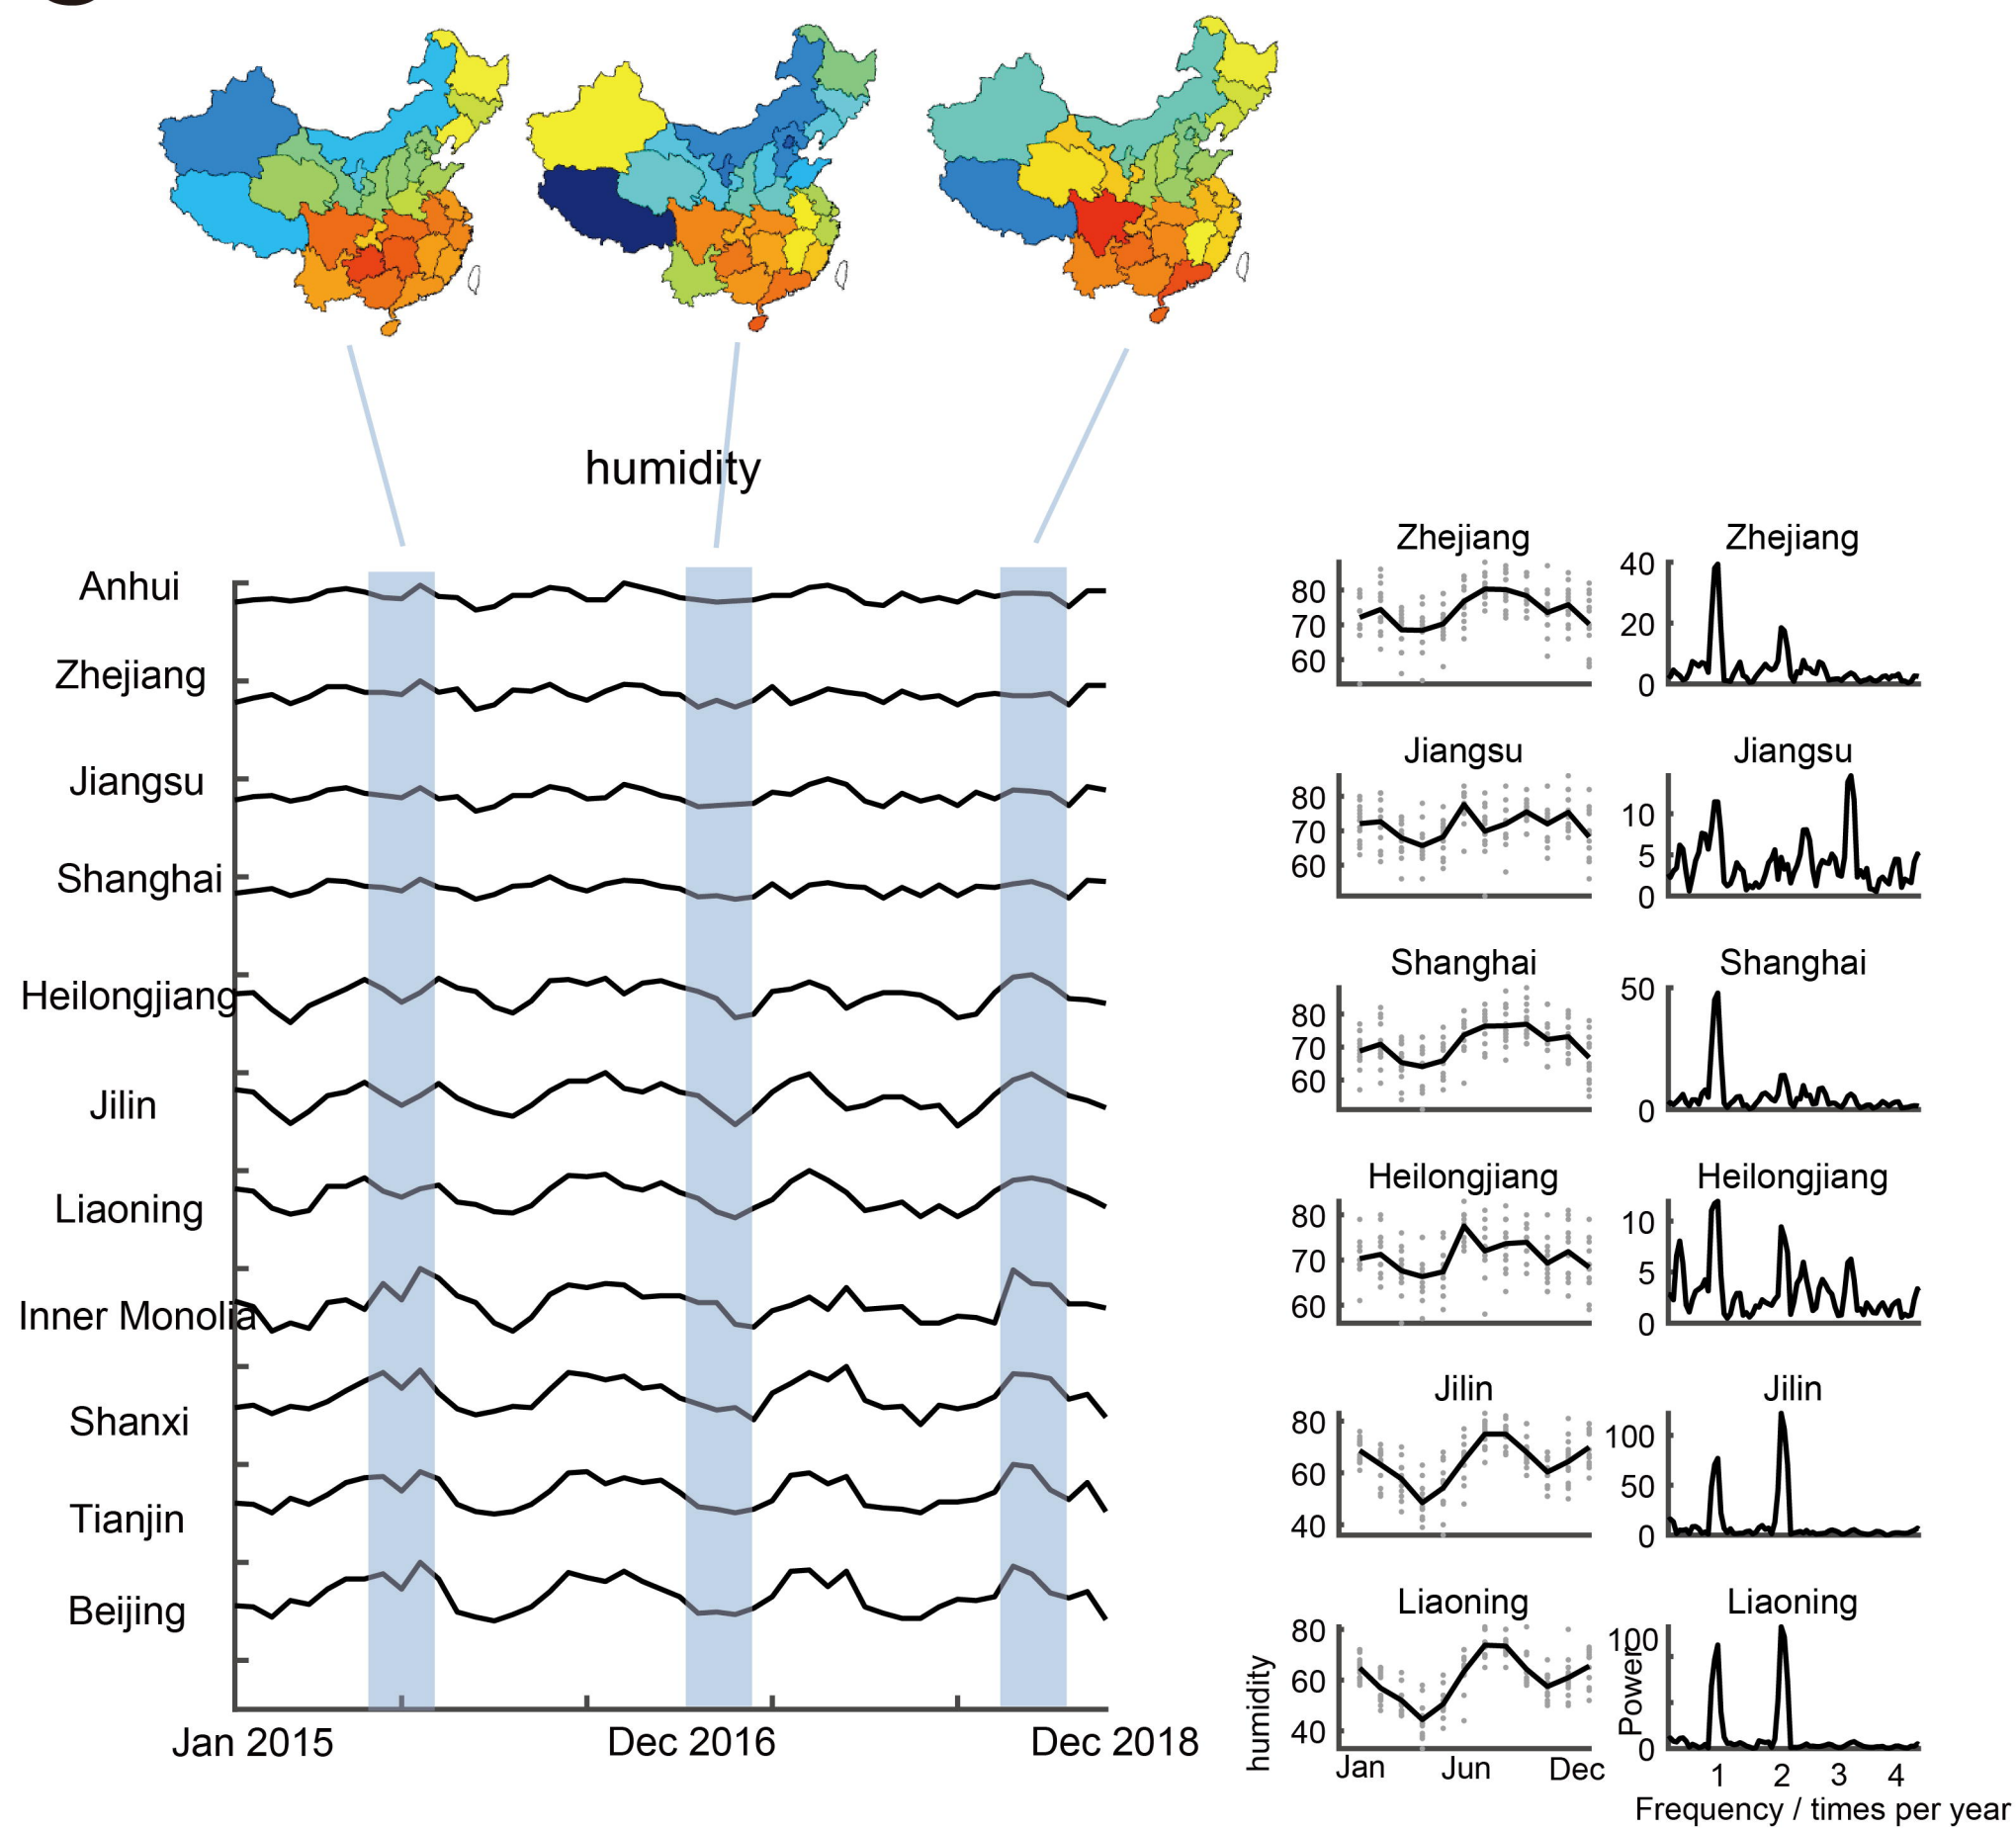**D**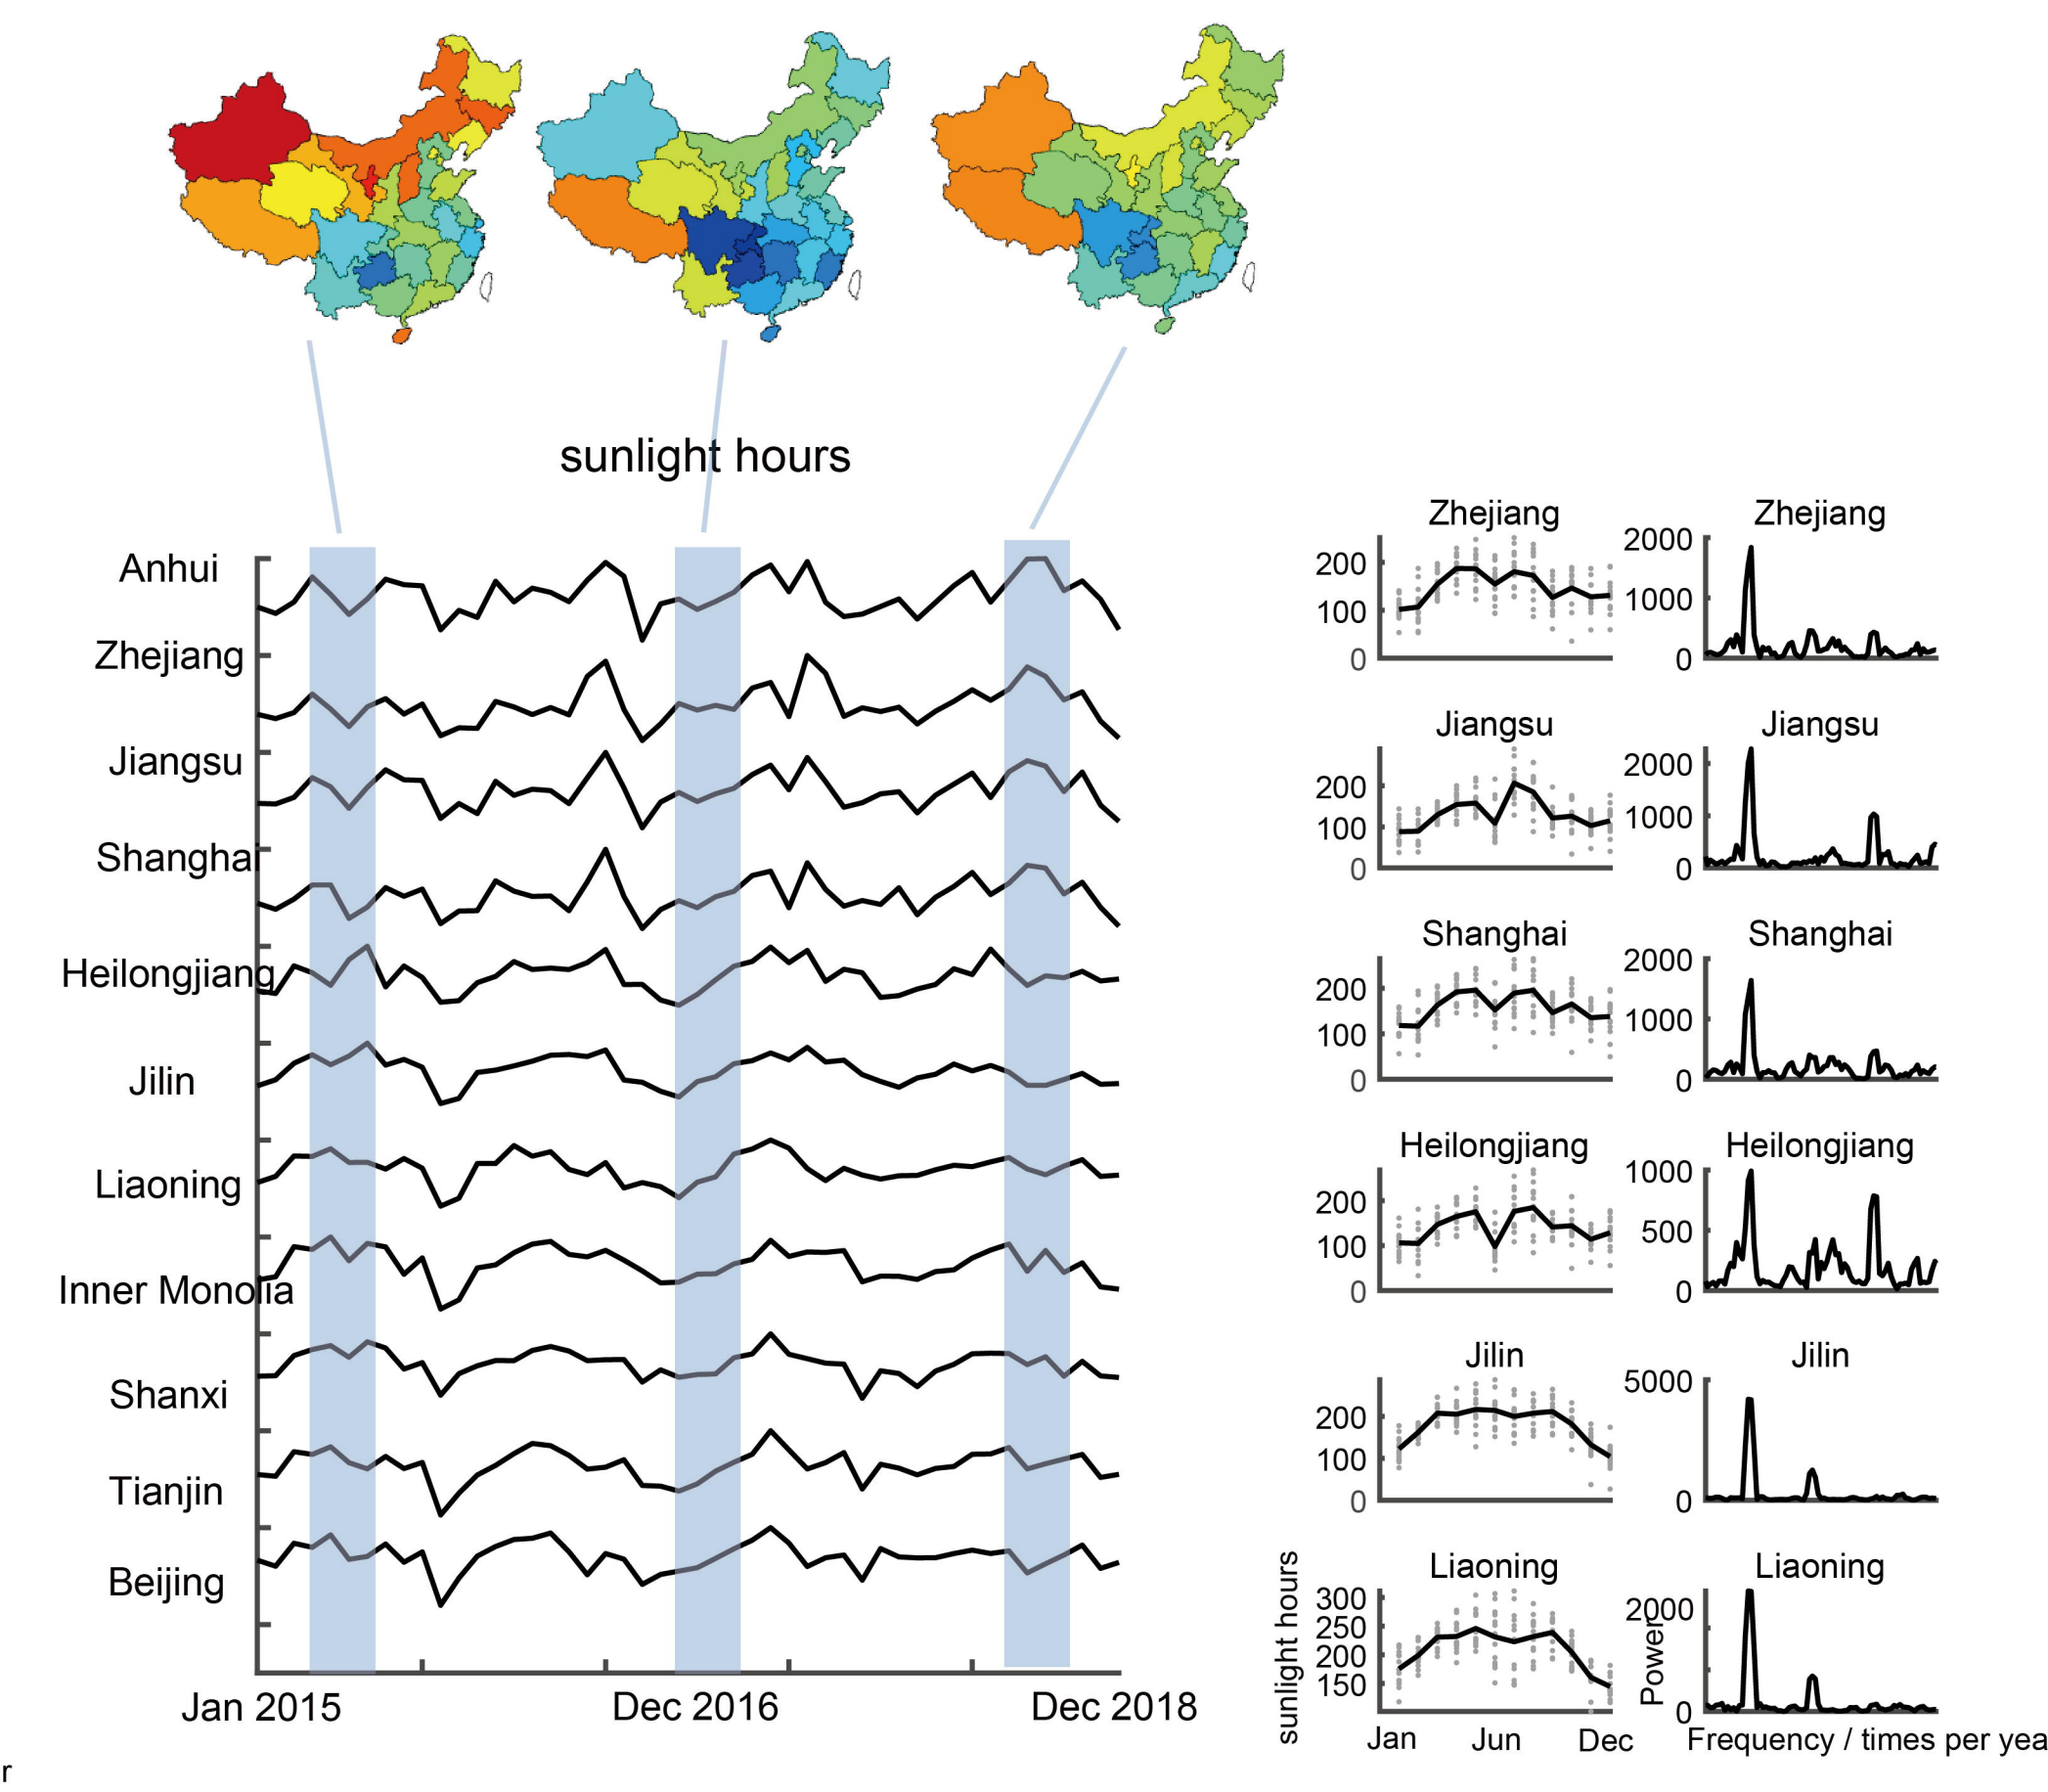

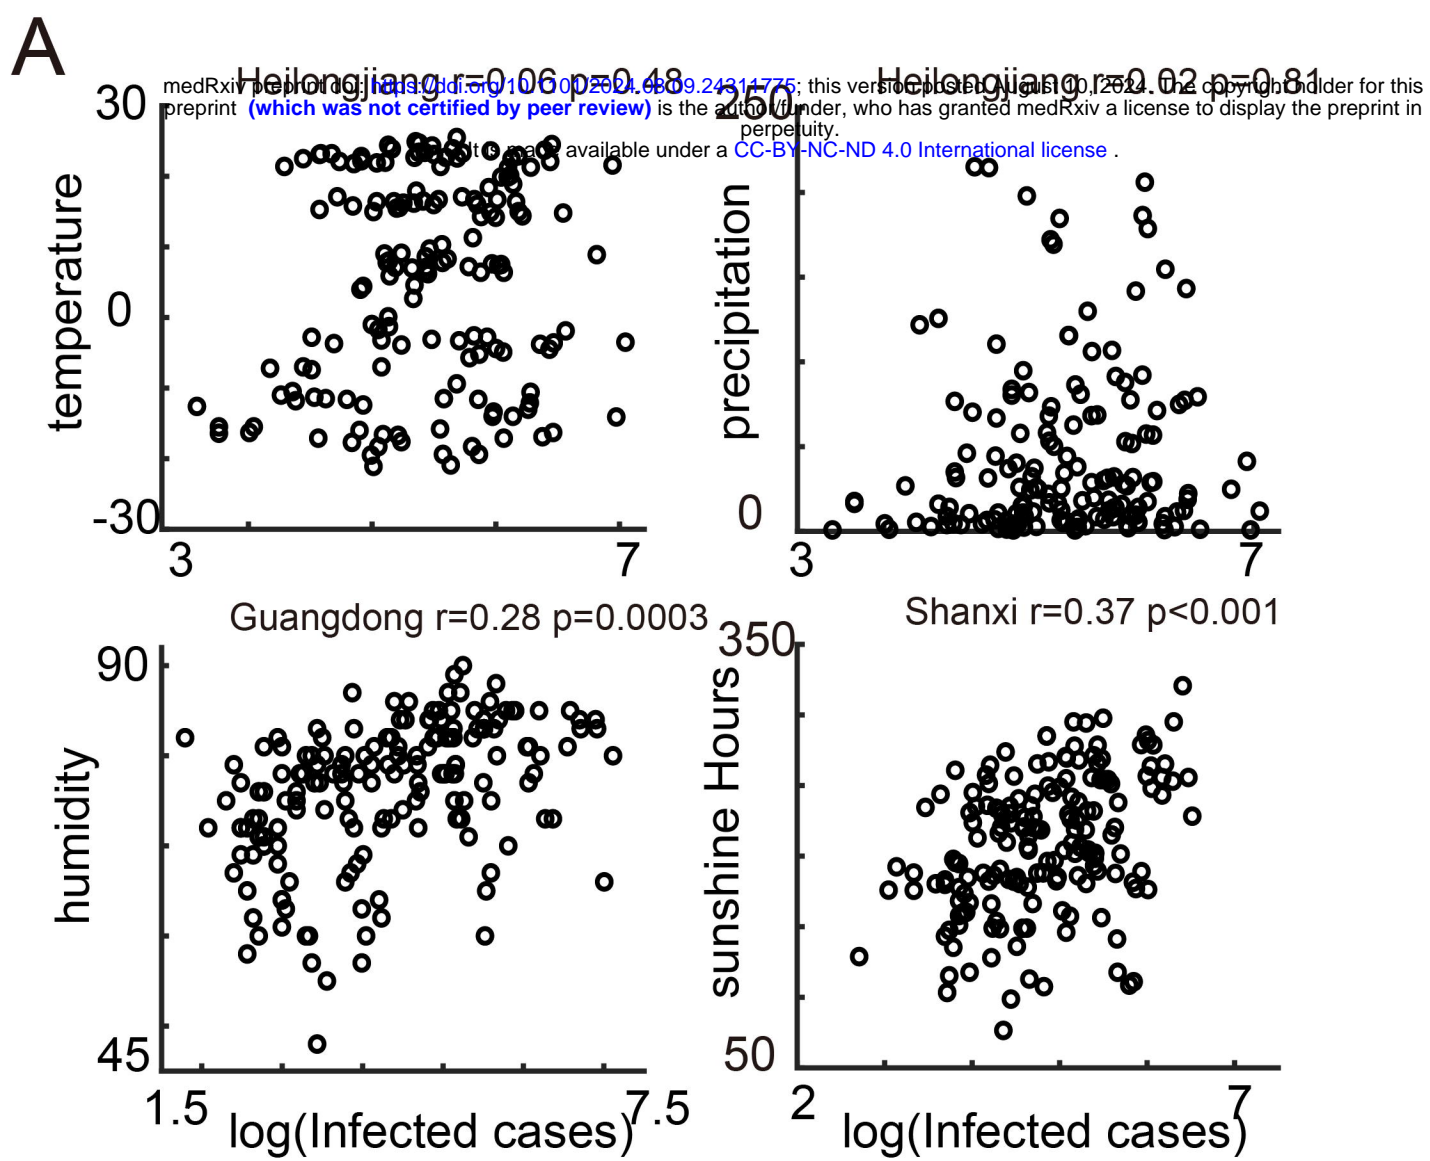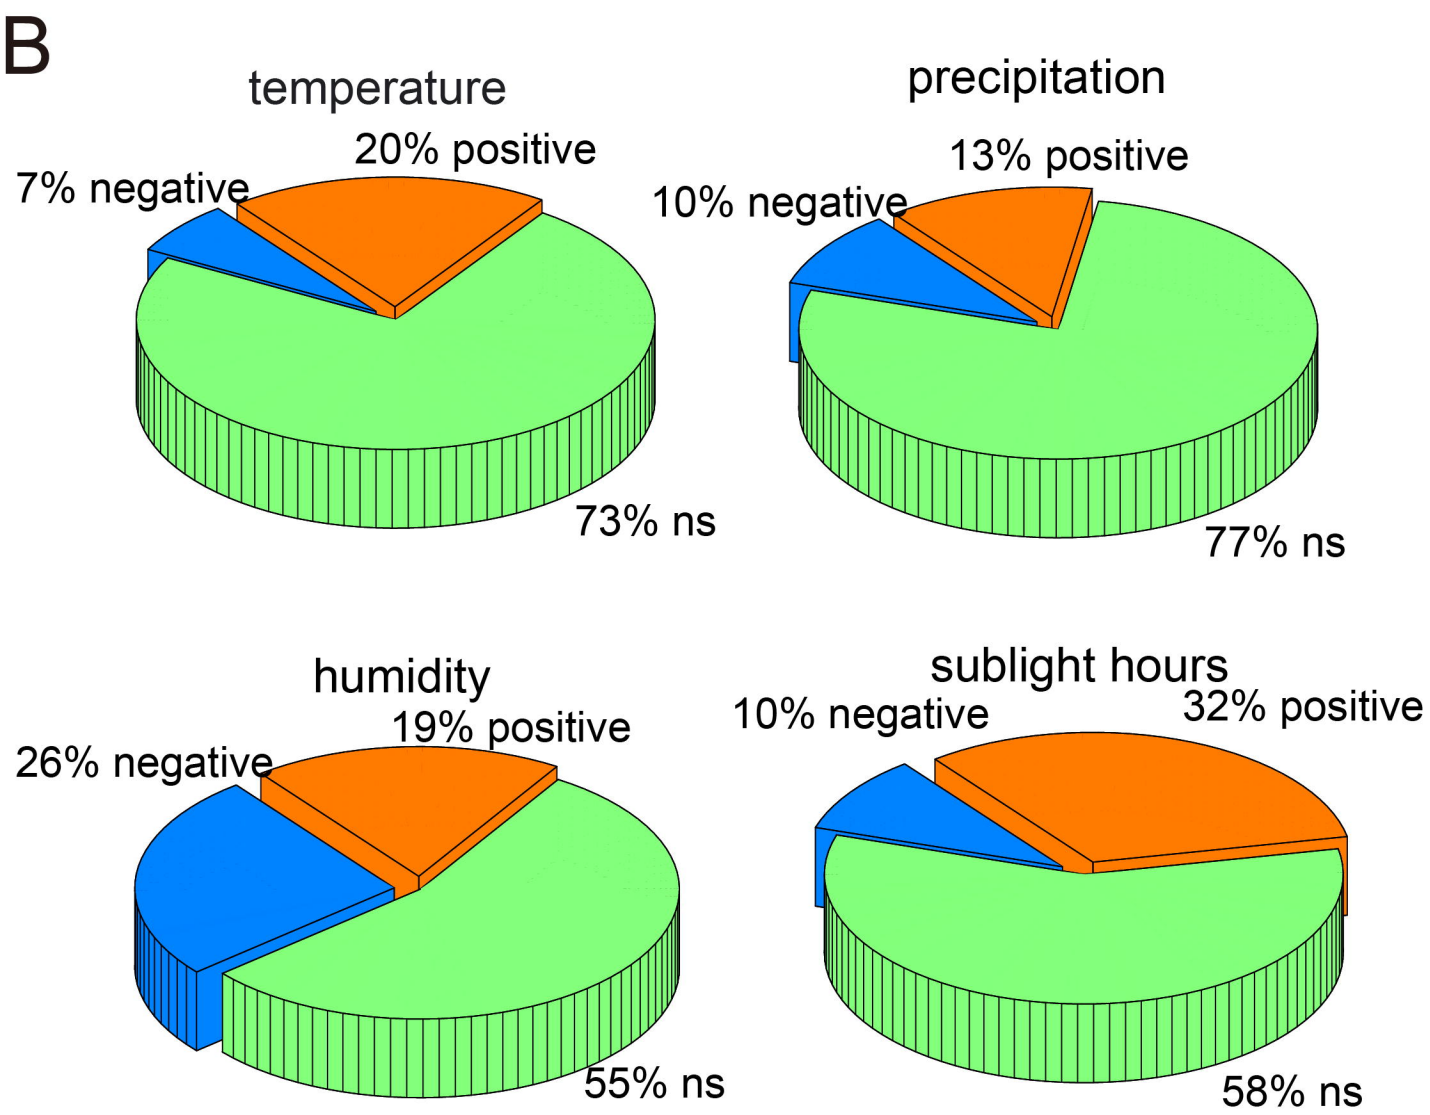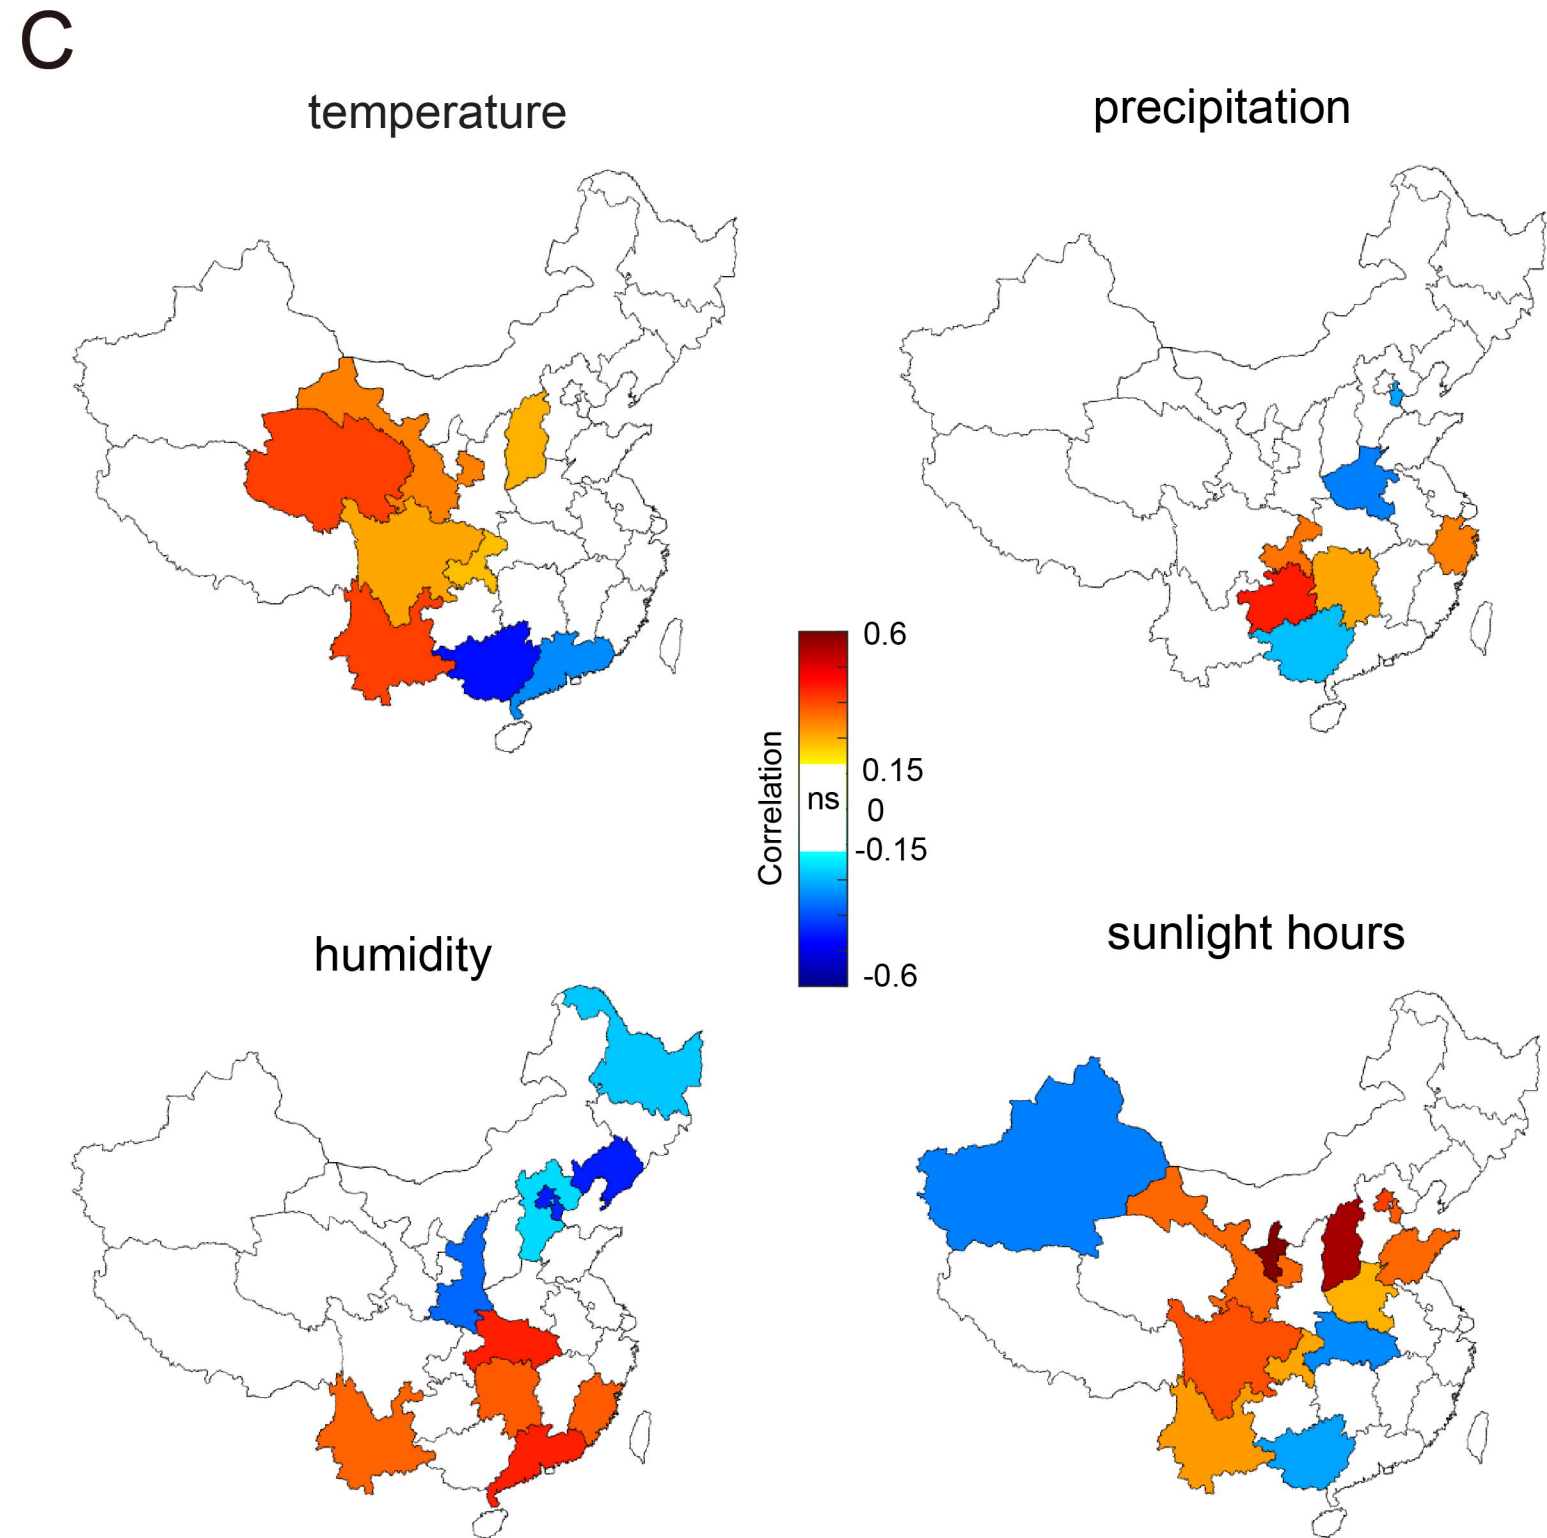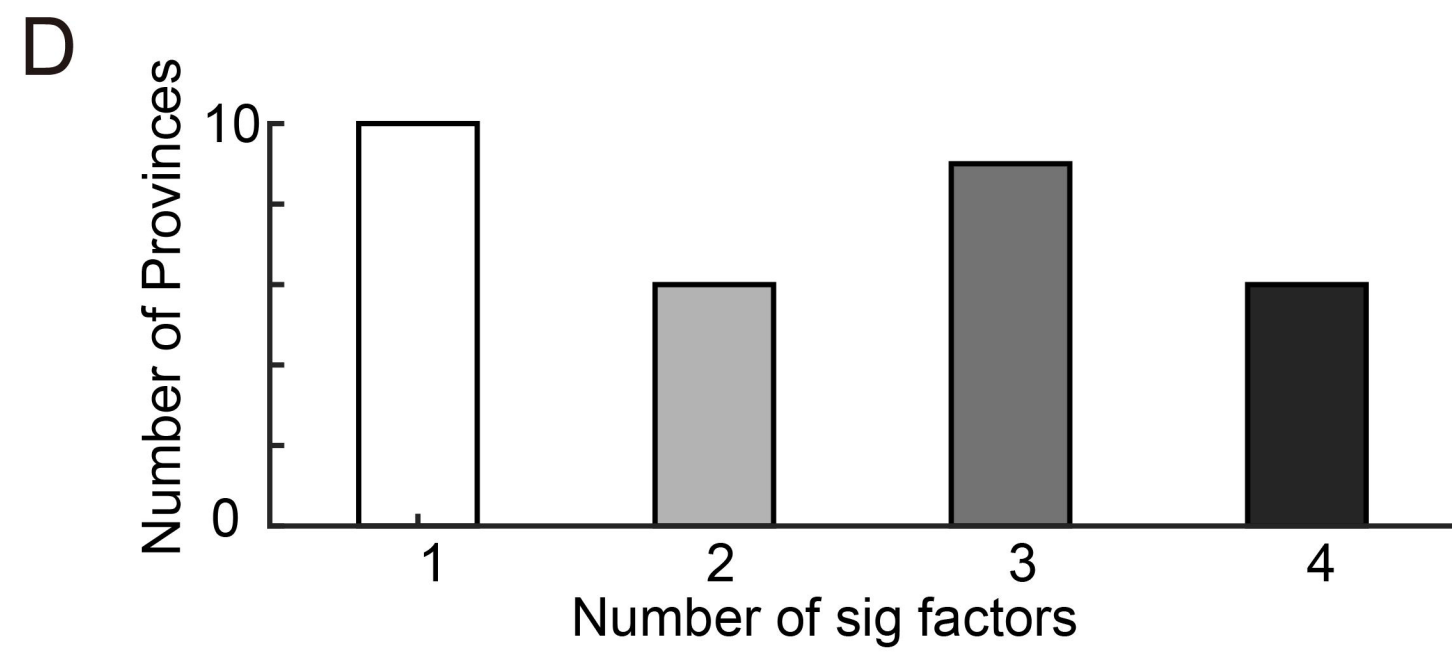

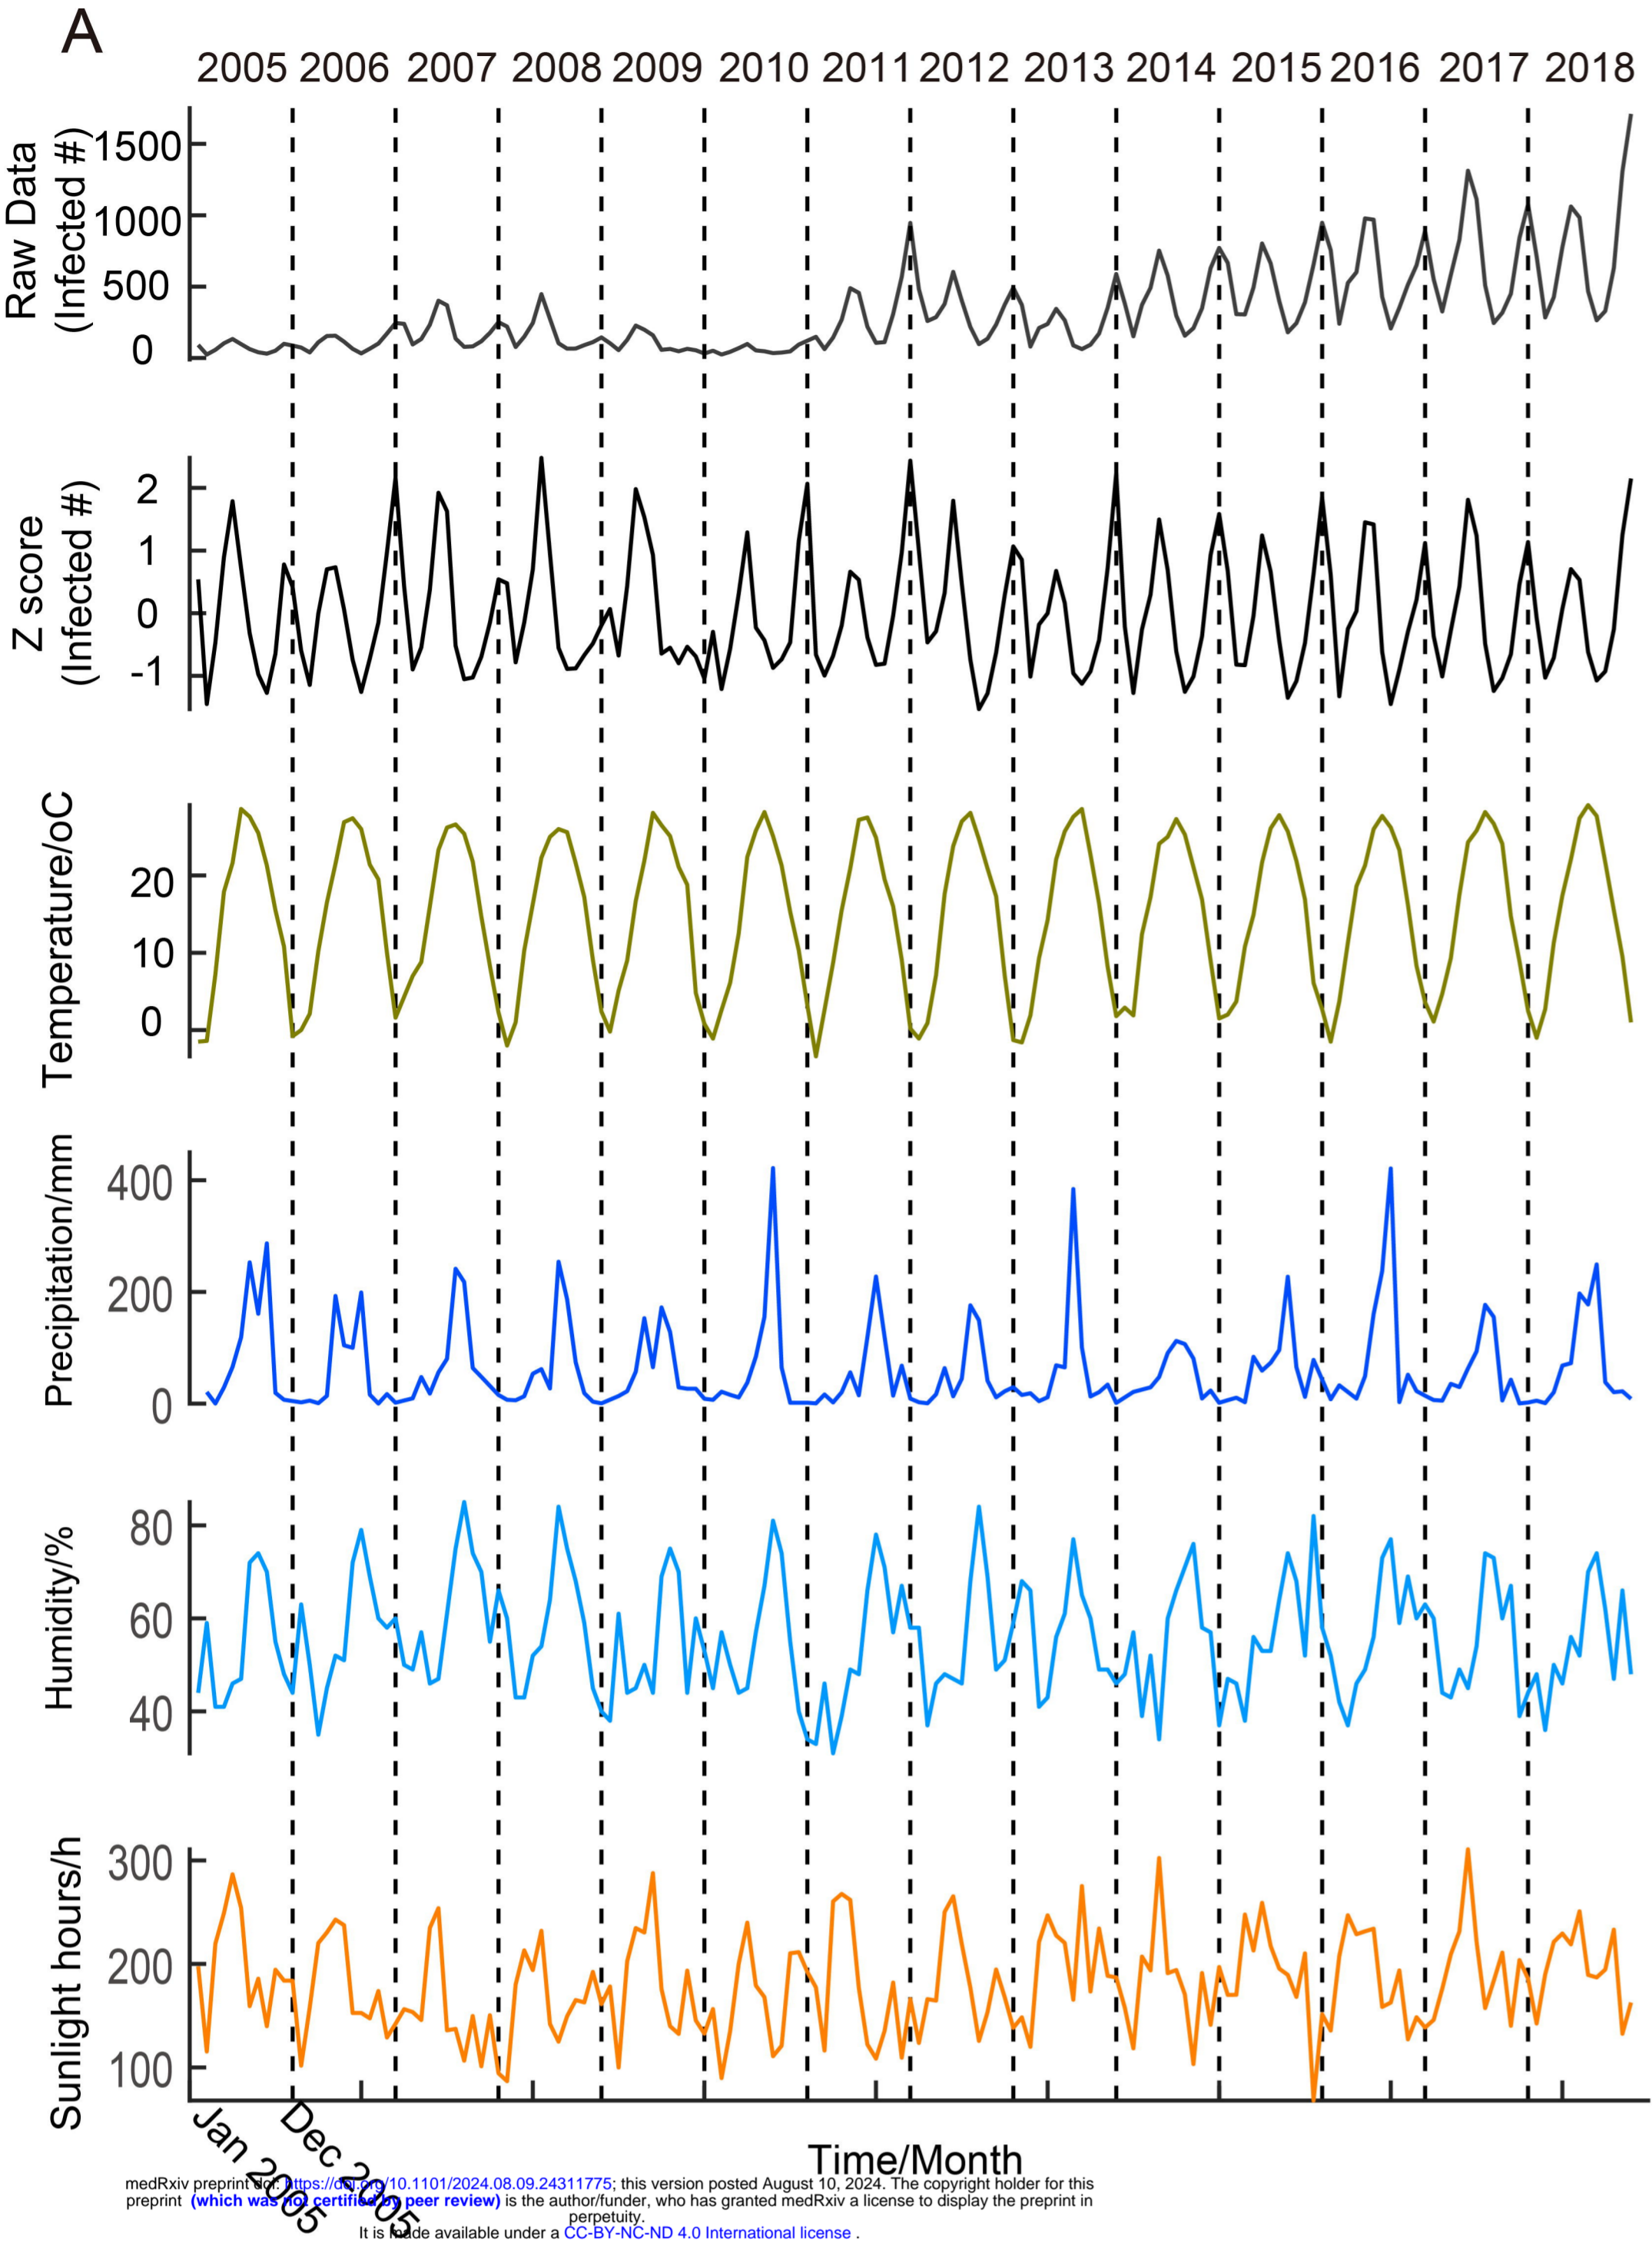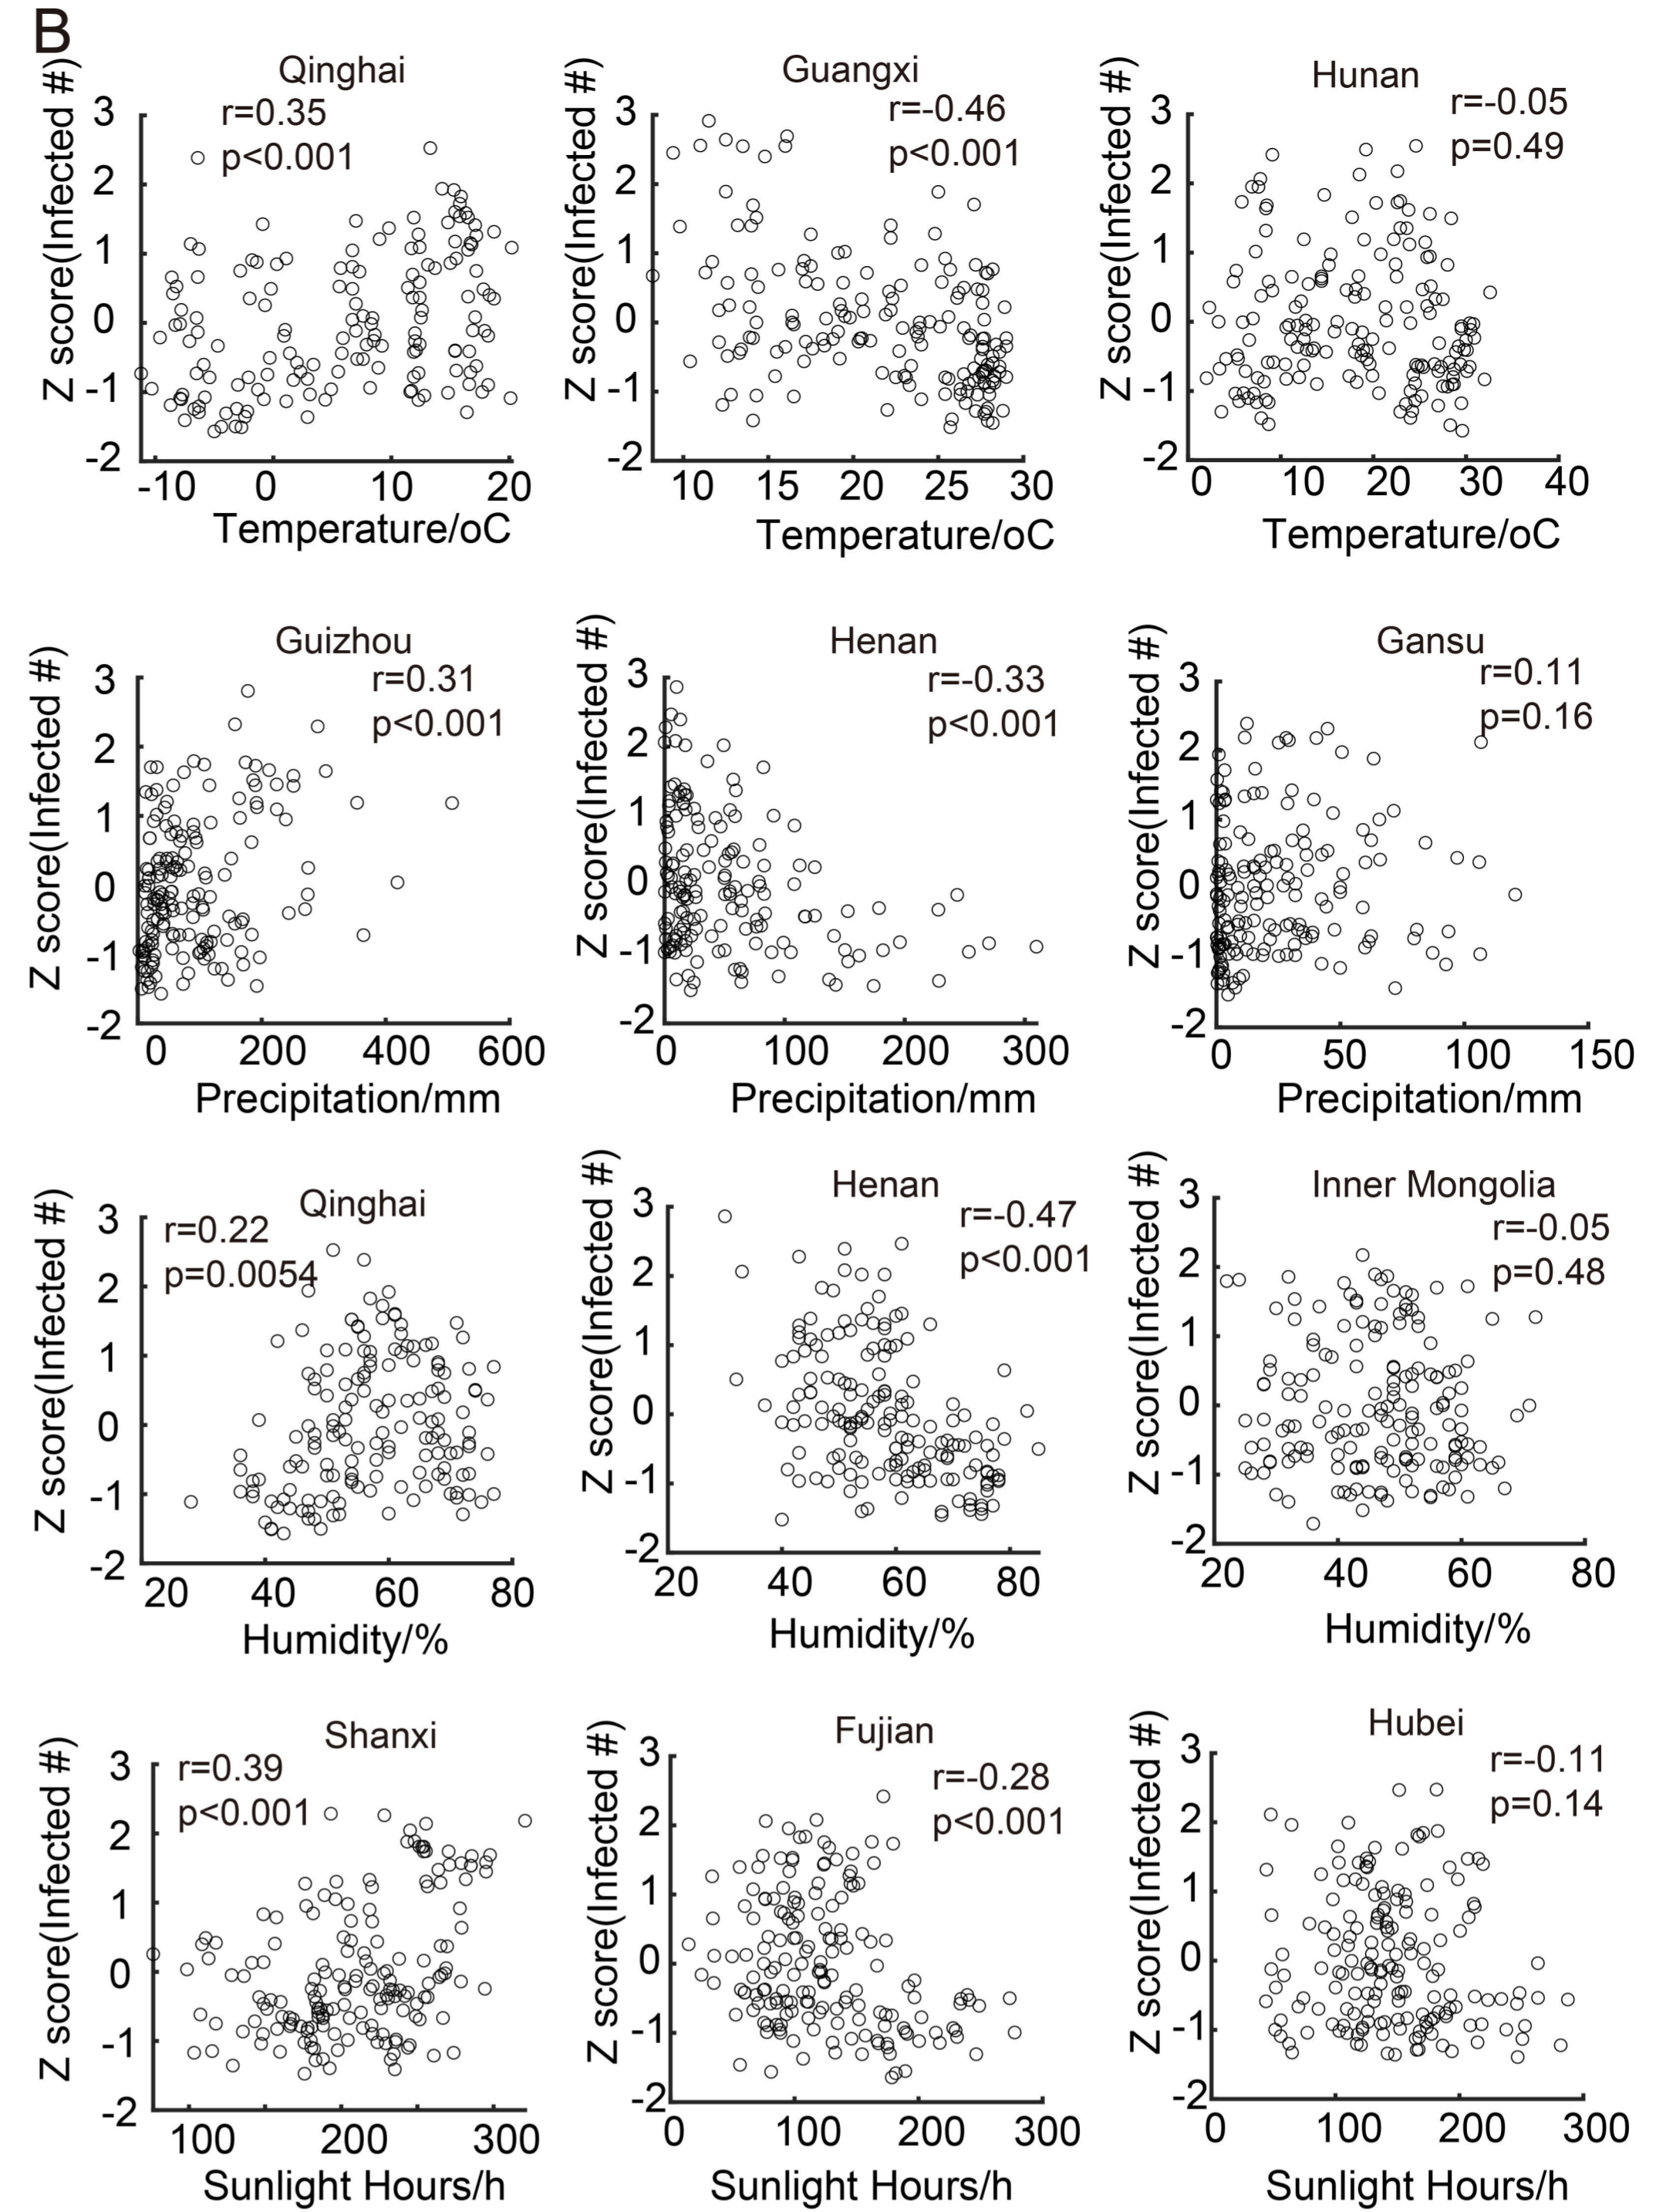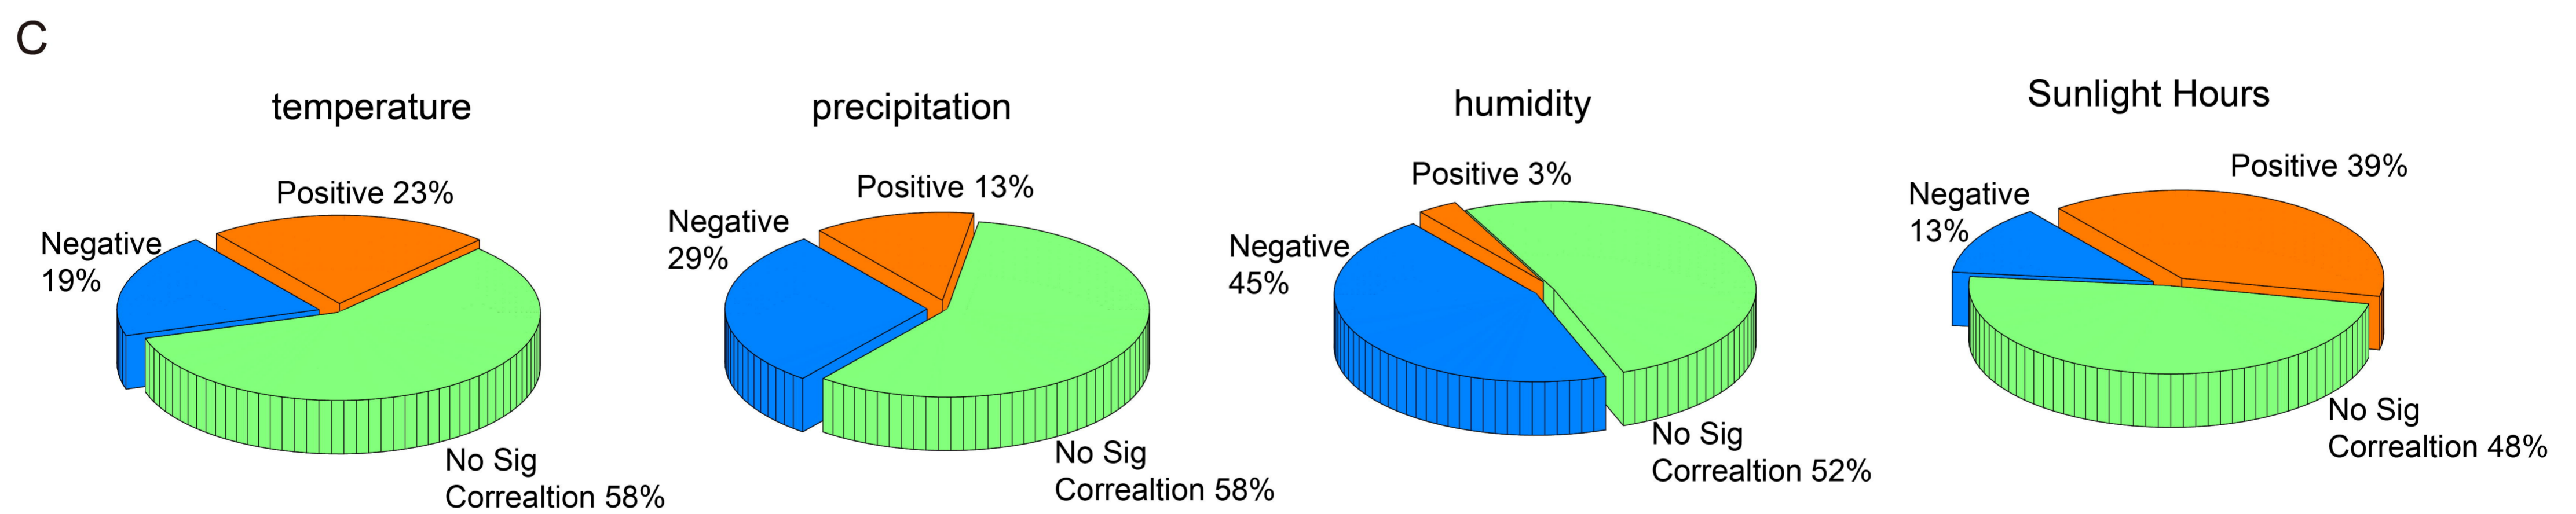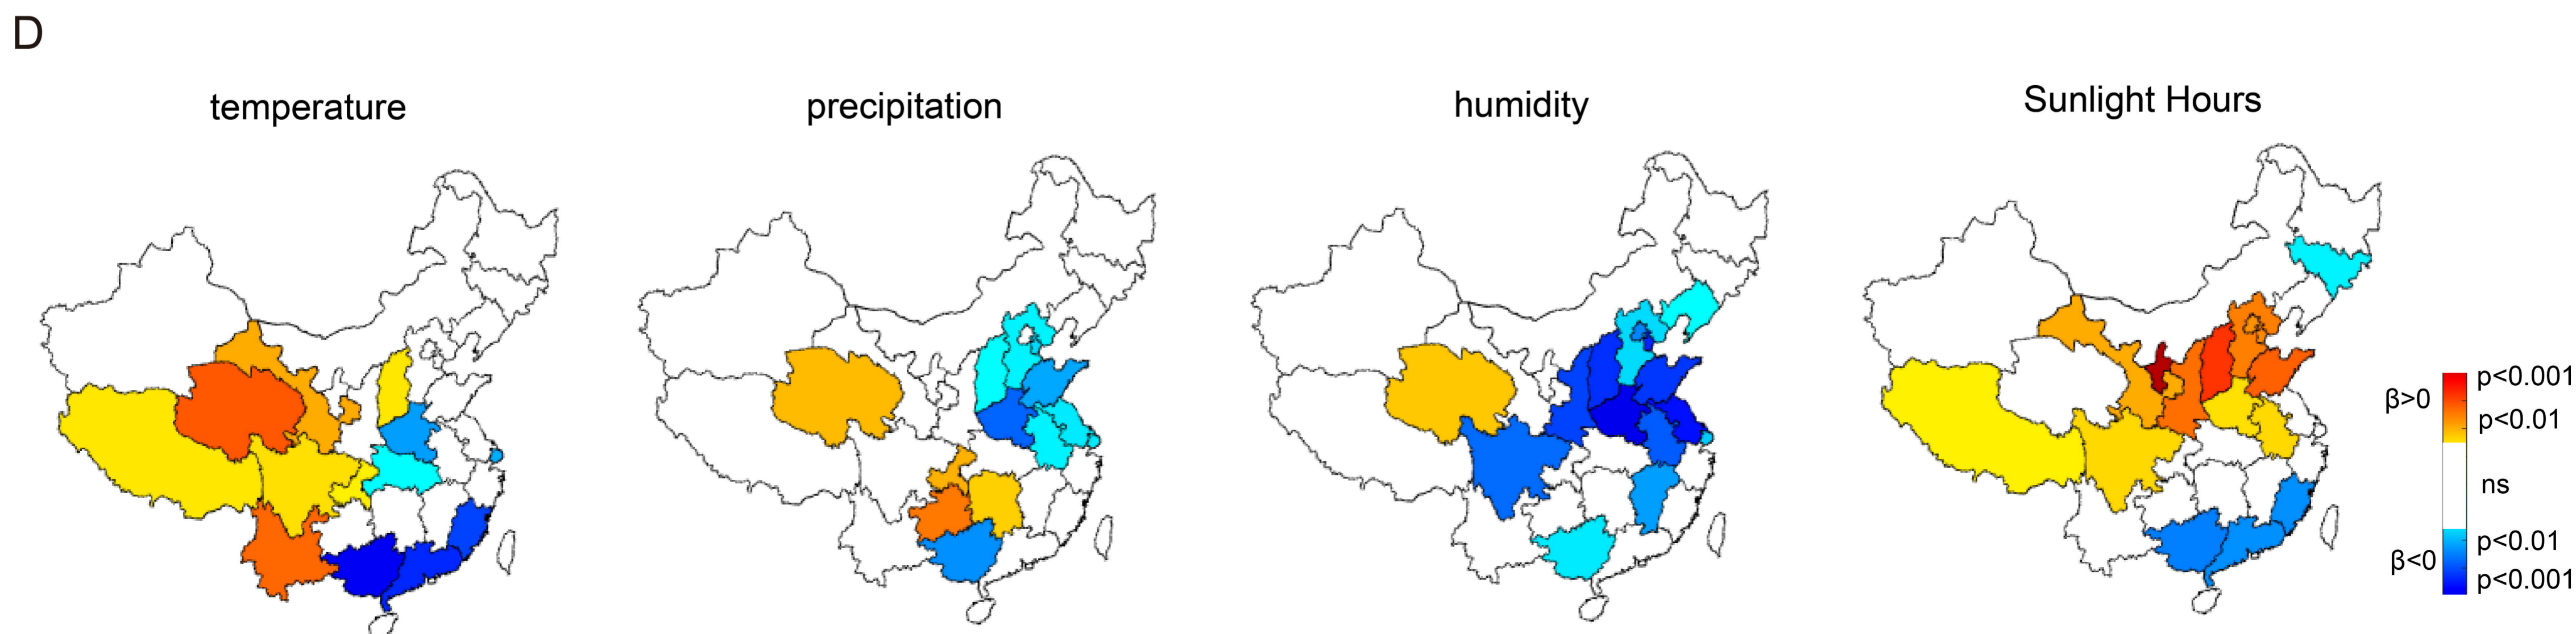

**A**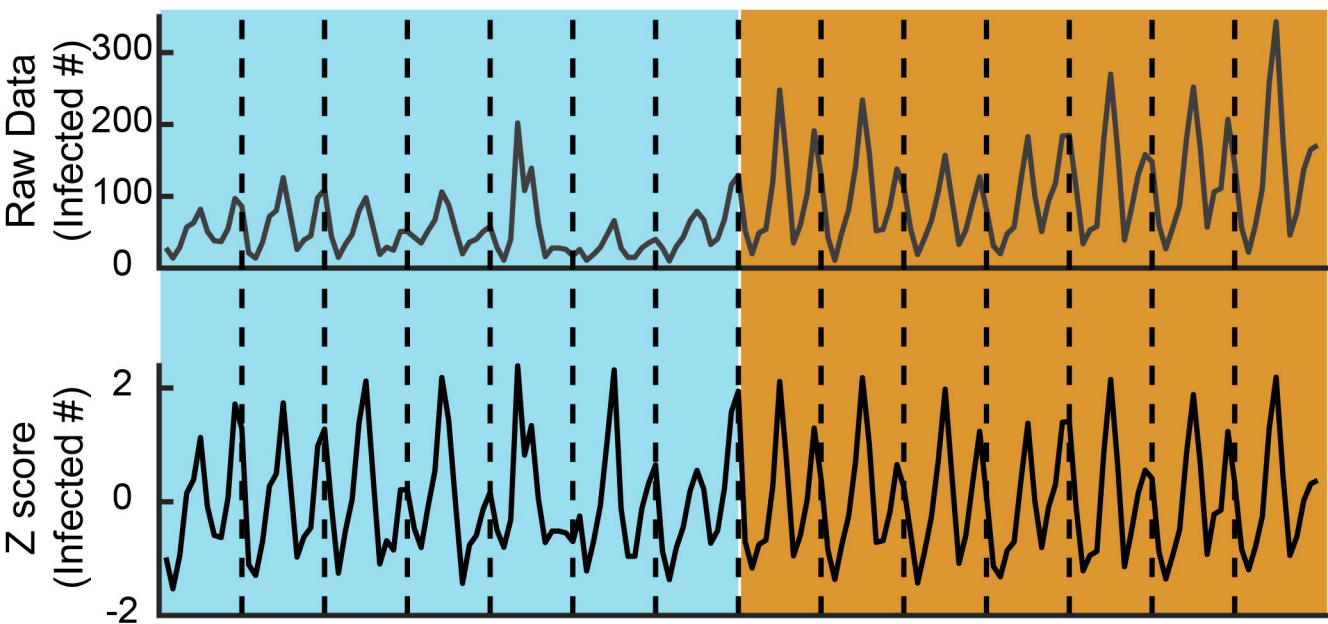**B**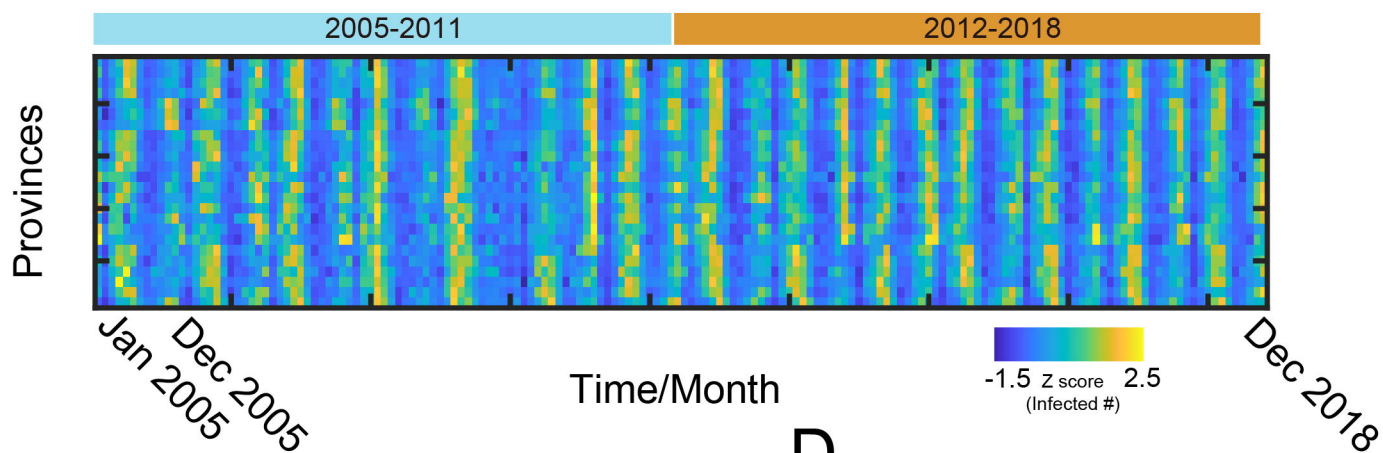**C**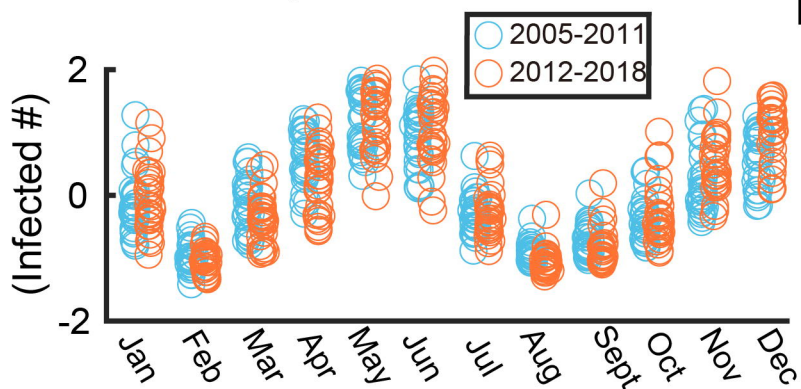**D**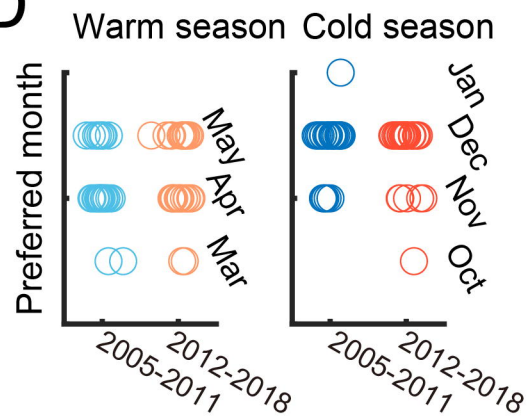

Source: https://medrxiv.org/content/10.1101/2024.08.09.24311775v1.full.pdf
